# Supplementary material
Source: PubMed Central journal article supplement (PMC9475544)
Supplement: EMBJ-41-e110488-s005.pdf [file EMBJ-41-e110488-s005.pdf]

**Binary organization of epidermal basal domains highlights robustness to environmental exposure**

Sangeeta Ghuwalewala\*, Seon A Lee\*, Kevin Jiang, Joydeep Baidya, Gopal Chovatiya, Pritinder Kaur<sup>2</sup>, David Shalloway and Tudorita Tumber<sup>#</sup>

\*Equal contributions

Department of Molecular Biology and Genetics, Cornell University, Ithaca, NY, USA

<sup>2</sup>Curtin Medical School/Curtin Health Innovation Research Institute, Curtin University, Perth, WA, Australia

<sup>#</sup>Corresponding author, [tt252@cornell.edu](mailto:tt252@cornell.edu)

## **APPENDIX MATERIAL**

- **Appendix Figures S1-5 (pages 3-10)**
  
- **Appendix Figure S1-5 Legends (pages 4-11)**
  
- **Appendix Tables S1-3 (pages 12-61)**

# Appendix figure and figure legends

## Appendix Figure S1 (Associated with Figure 4)

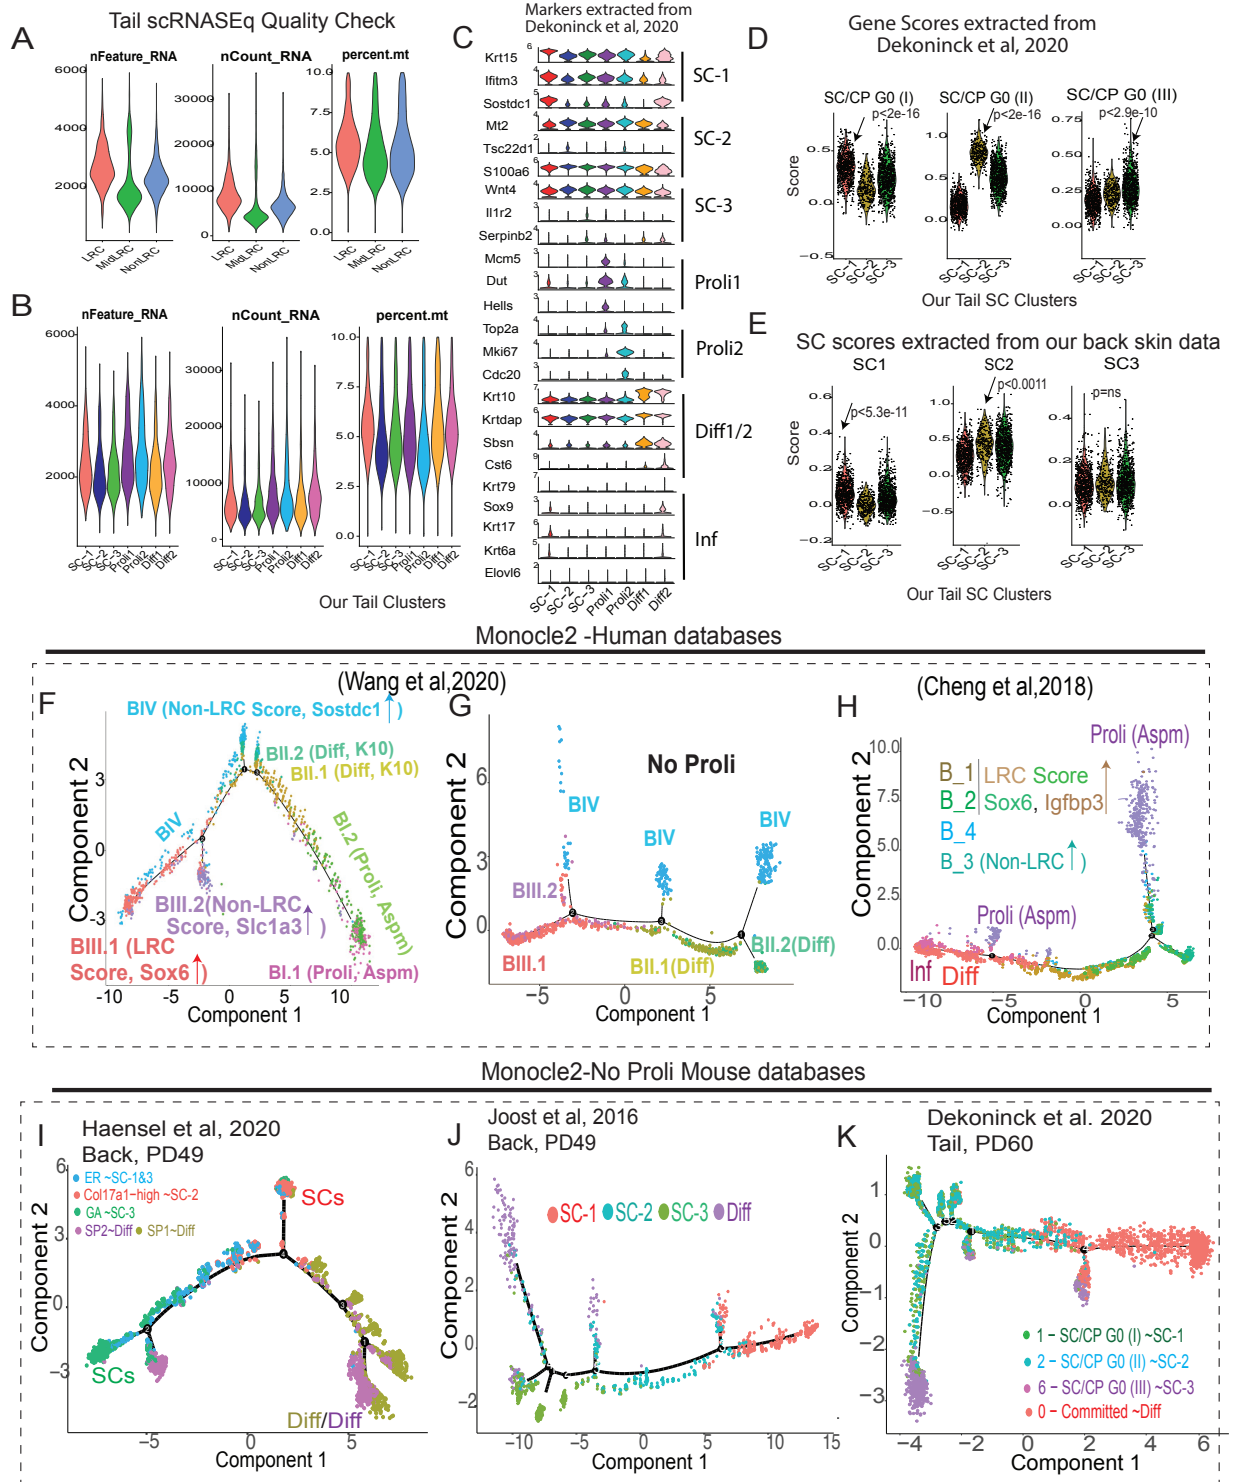

## Appendix Figure S1:

### Tail and human skin scRNA-seq analysis of sorted basal LRCs, Mid-LRCs, Non-LRCs

(Associated with Figure 4)

(A, B) (A) mRNA or gene count and percent mitochondrial genes showing the quality controls for cells used for scRNA-seq analysis are shown as violin plots for the tail sorted samples from 2 replicates and its (B) seven clusters.

(C, D) (C) Violin plots showing expression of genes to assign cell identity to each cell cluster and (D) SC gene scores extracted from (Dekoninck *et al.*, 2020). These data indicate correlations amongst the 3 SC populations from our tail databases. P value was calculated using pairwise Wilcoxon rank-sum tests with Benjamini-Hochberg correction.

(E) Correlations of our tail and back skin SC clusters. P value was calculated using pairwise Wilcoxon rank-sum tests with Benjamini-Hochberg correction.

(F-H) Lineage trajectory using Monocle 2 showing all clusters (F) or non-proliferative only clusters (G) from human foreskin (Wang *et al.*, 2020) and all clusters from adult human scalp (Cheng *et al.*, 2018) (H).

(I-K) No Proli(ferative) clusters extracted from published databases as indicated (Dekoninck *et al.*, 2020; Haensel *et al.*, 2020; Joost *et al.*, 2016) used to generate Monocle 2 lineage trajectories.

# Appendix Figure S2 (Associated with Figure 5)

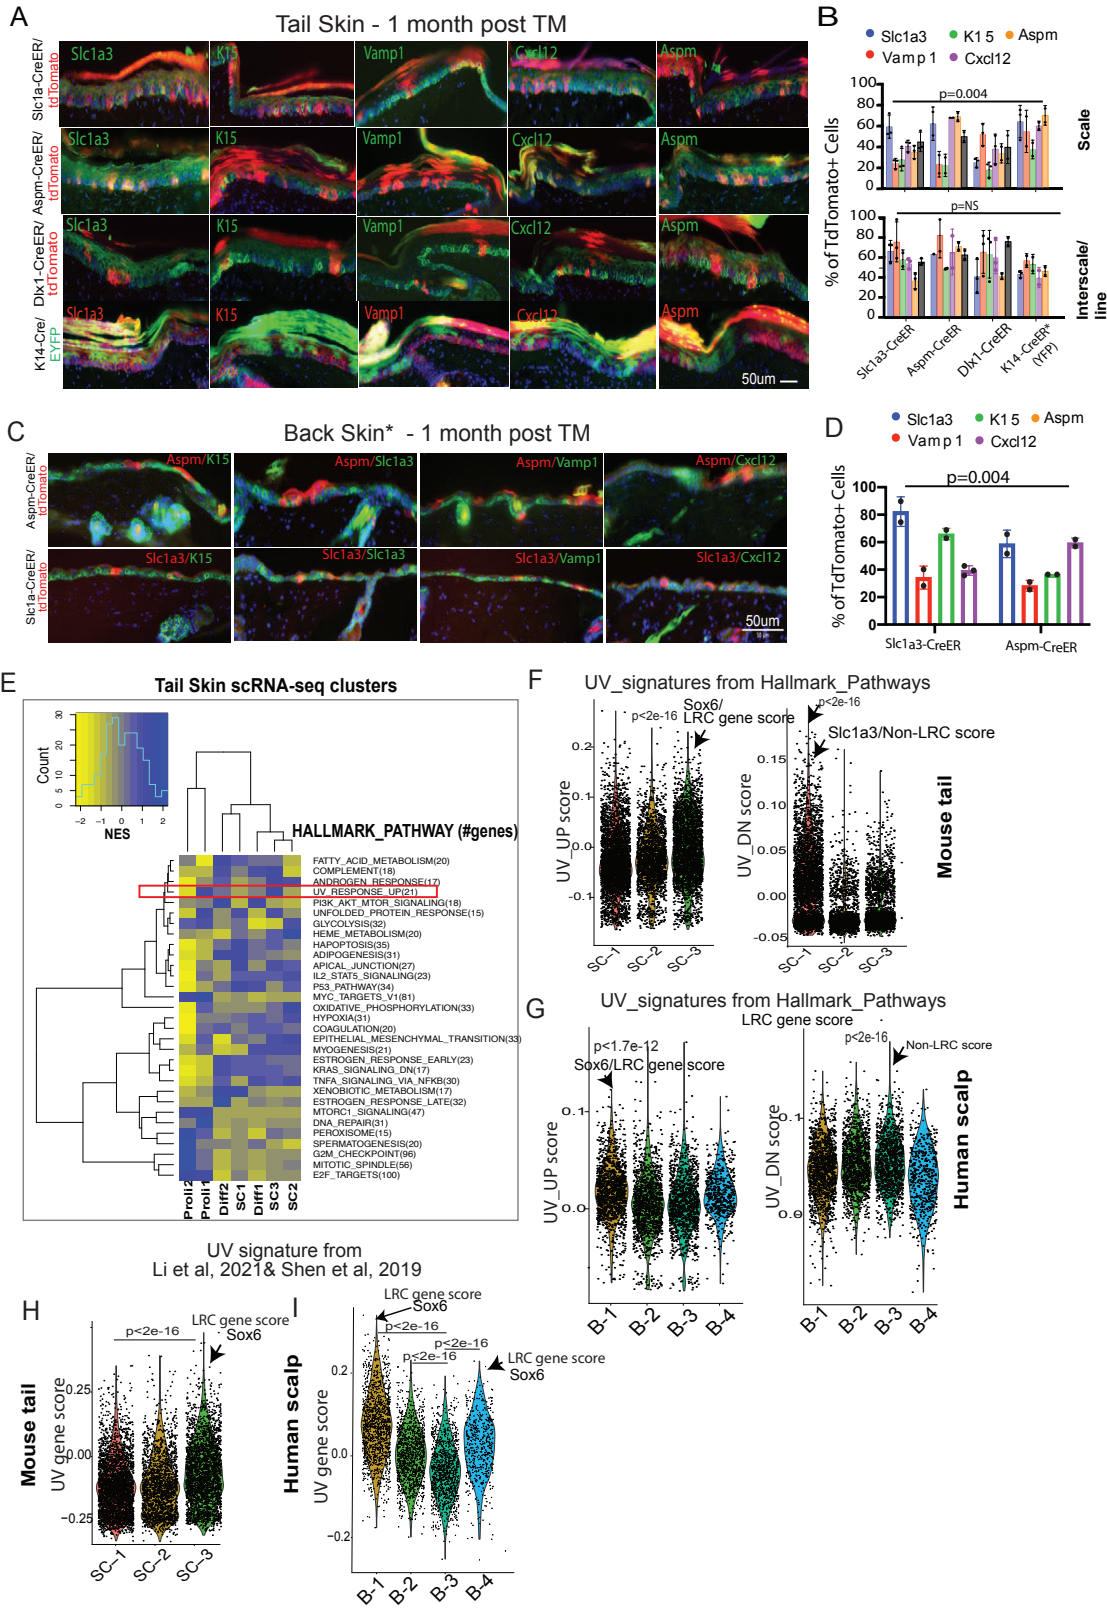

## Appendix Figure S2:

### **Molecular characterization reveals the distinct nature of IFE population and differential expression of UV-response genes** (Associated with Figure 5)

(A) Images showing immunofluorescence staining of all the IFE markers within the lineage-traced Slc1a3-CreER, Aspm-CreER, Dlx1-CreER and K14-CreER basal cells in the tail epidermis. Scale bar~200  $\mu\text{m}$ .

(B) Fraction of tdTomato<sup>+</sup> (EYFP for K14-CreER) cells positive for the respective markers in scale vs interscale for N= 2 or 3 mice per experiment (6-7 images per mouse). Error bars are SDs. P-values calculated by Student's t-test (mixed effects model)

(C) Images of back skin stained for indicated markers show co-localization in lineage-traced Slc1a3-CreER and Aspm-CreER labeled progenies (asterisks indicate back skin equivalence). Scale bar=50  $\mu\text{m}$

(D) Quantification of data in (C). Error bars are SDs. P-values calculated by Student's t-test (mixed effects model) from 2 mice and 5-6 images per replicate.

(E) Heat map of pathways differentially expressed in scRNA-seq clustered generated from mouse tail skin shows differential regulation of UV-response genes.

(F, G). Hallmark\_Pathway of UV-UP or DN regulated genes in mouse tail (F) and (G) human scalp. Note UV-UP gene scores is higher in the SC clusters with high Sox6 and LRC gene expression scores. P value was calculated using pairwise Wilcoxon rank-sum tests with Benjamini-Hochberg correction.

(H) Similar analysis as in (F,G) but with a different UV-gene signature (Dataset EV1) extracted from studies indicated shows enrichment in the Sox6 clusters, which is located in the more exposed epidermal regions. P value was calculated using pairwise Wilcoxon rank-sum tests with Benjamini-Hochberg correction.

# Appendix Figure S3 (Associated with Figures 5/6)

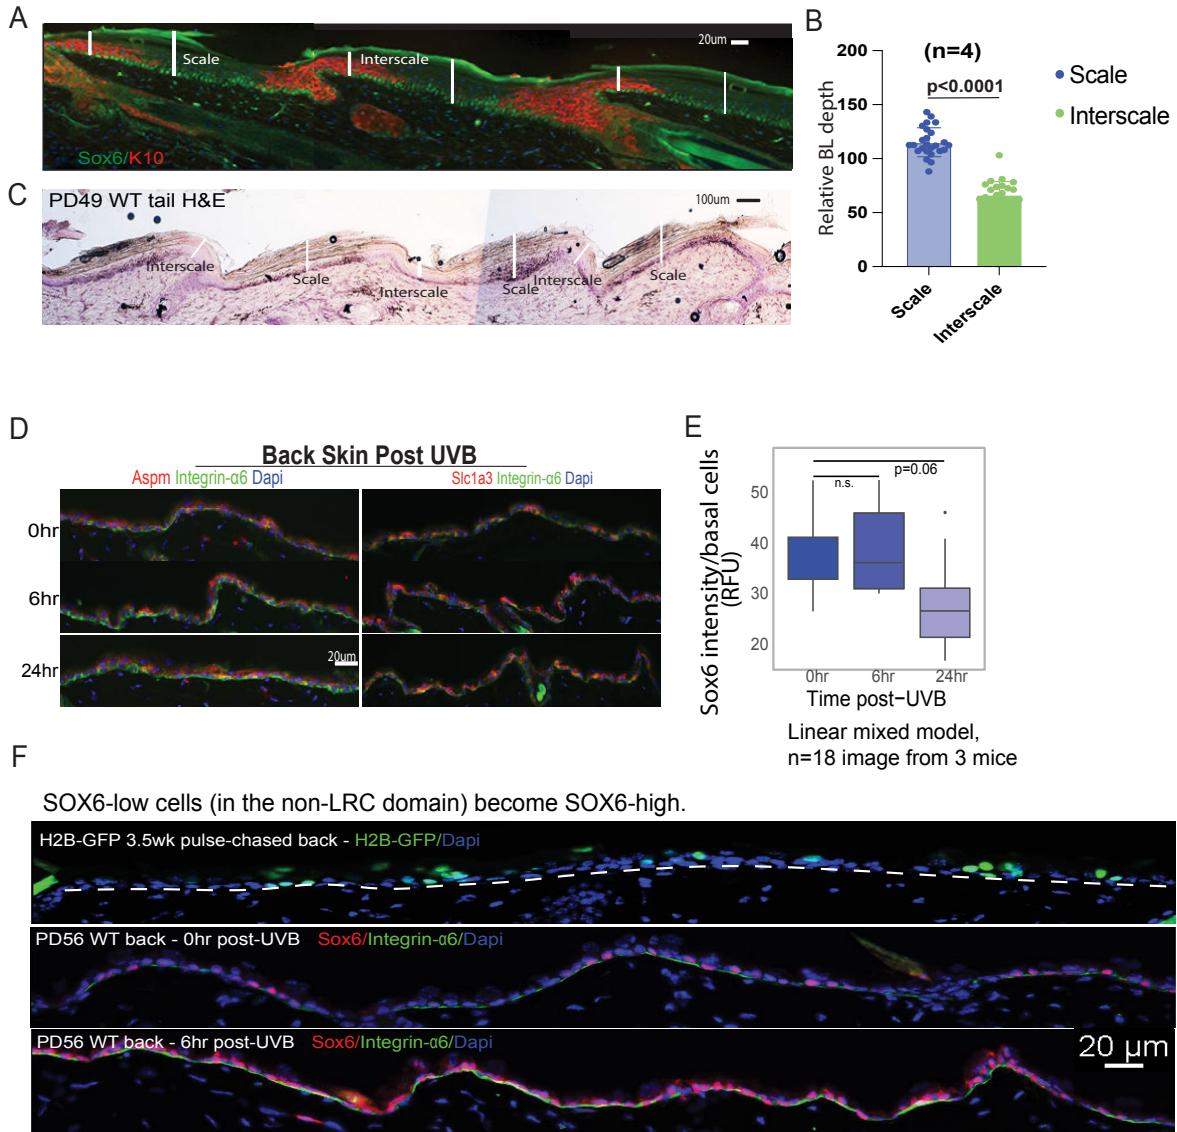

### Appendix Figure S3:

#### Thickness of scale vs interscale and expression of LRC/non-LRC genes in response to UVB

(Associated with Figure 5)

(A, B) (A) Images showing the long view of tail skin with Sox6/K10 staining used to measure the basal layer depth of scale vs interscale, quantified in (B). Scale bar =20  $\mu\text{m}$ ; lines indicate examples of depth measurements obtained at scale and interscale from N= 4 mice (6-7 images per mouse). Error bars are SDs. P-values calculated by Student's t-test.

(C) H&E images of the same tissue. Scale bar on right top = 100 $\mu\text{m}$ .

(D) Expression of *Aspm* and *Slc1a3* in the basal layer of back skin at time points after acute UVB exposure show no apparent changes.

(E) Box plot of average Sox6 intensity changes in Sox6<sup>high</sup> basal cells in response to UVB. RFU=relative fluorescence unit. Central band is the mean value, the top of box indicates 25th percentile, while the bottom of the box indicates 75th percentile. Whiskers indicate minimum and maximum values in the data, with dots indicating potential outliers. Linear mixed model statistical test was used with data from 18 images from 3 biological replicates.

(F) Representative long-view immunofluorescence images of LRC clusters in back skin, compared to similarly sized Sox6<sup>high</sup> clusters interspersed with Sox6<sup>low</sup> cells during homeostasis (0hr UVB); note larger Sox6<sup>high</sup> clusters at 6hrs post-UVB demonstrating that Sox6<sup>low</sup> cells acquire Sox6<sup>high</sup> levels. % Sox6 high cells are quantified in Figure 5H. Dashed line indicates basement membrane.



Appendix Figure S4 (Associated with Figures 5/6)

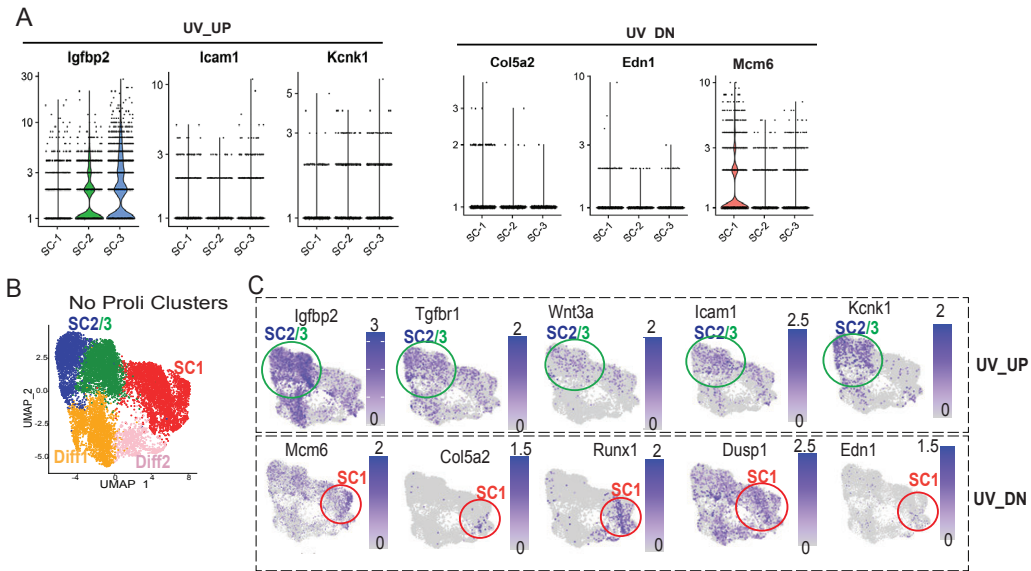

**Appendix Figure S4:**

**Expression of UV signature genes in scRNAseq clusters (Associated with Figure 5/6)**

(A-C) Violin (A) and feature plots (B-C) of individual genes listed in the UV regulated signatures that show differential expression in the different SC clusters.

# Appendix Figure S5 (Associated with Figure 6)

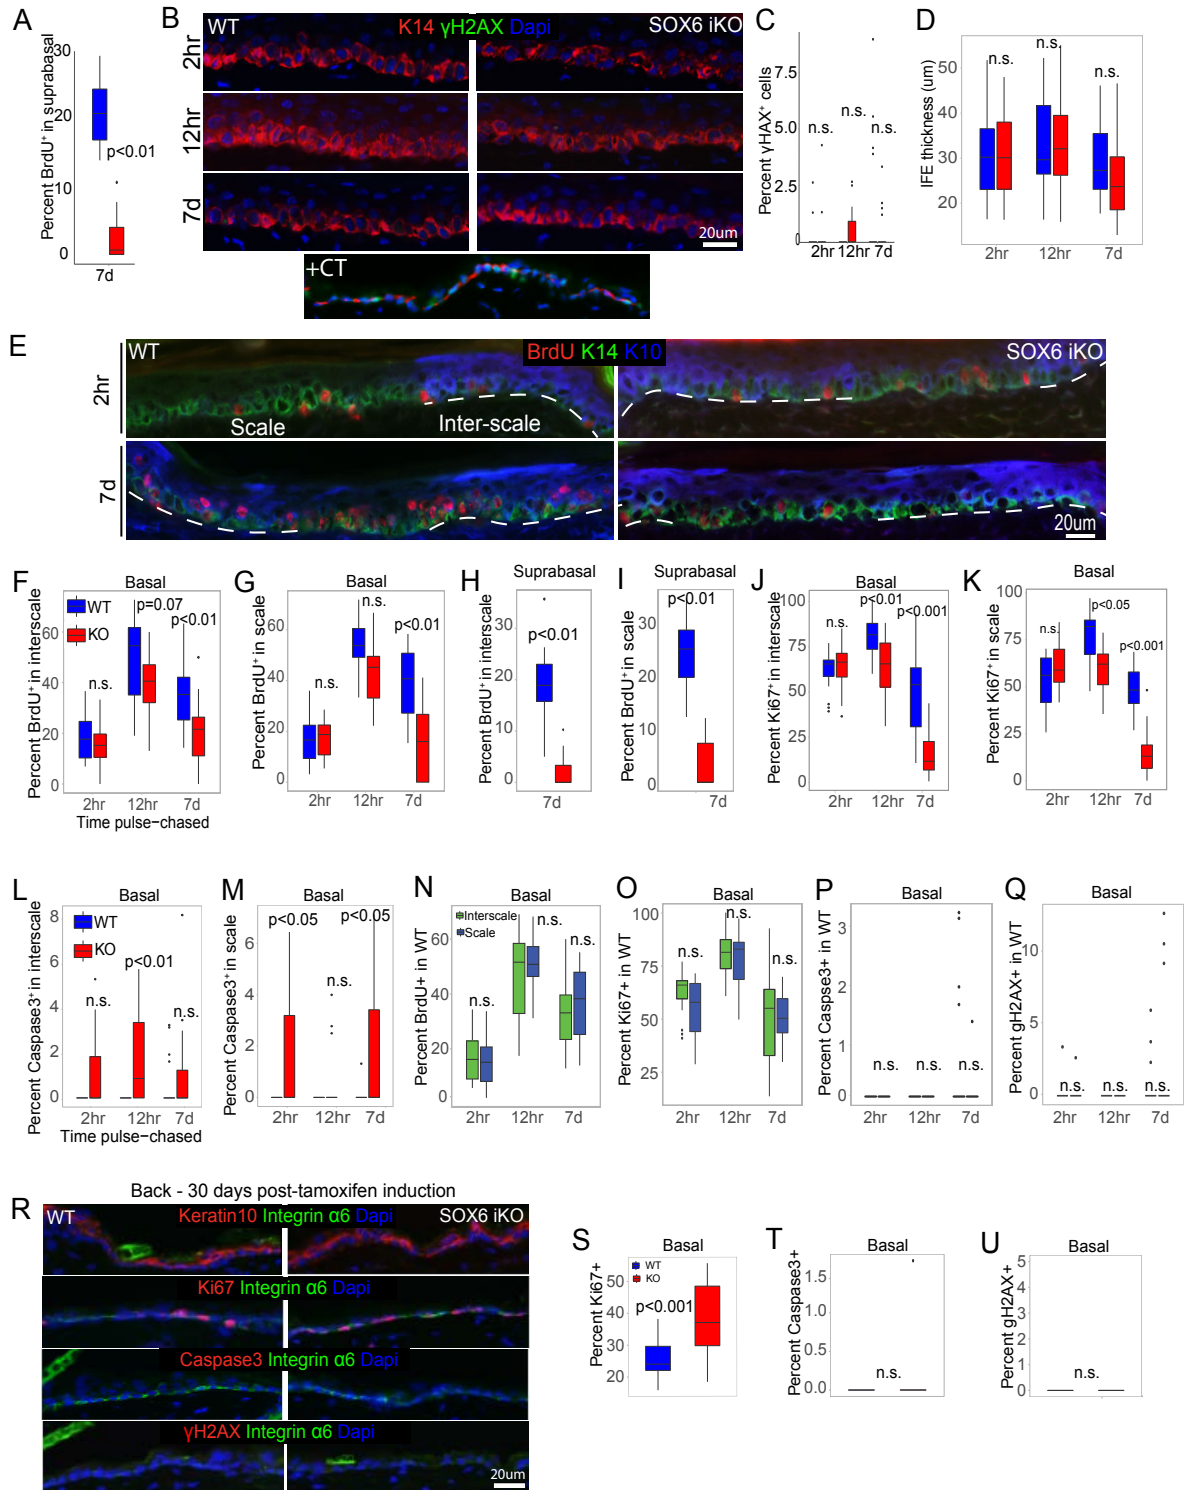

## Appendix Figure S5:

### Sox6-loss of function phenotype in mouse skin (Associated with Figure 6)

(A) BrdU counts of suprabasal cells from tail skin complementing data in Figure 6 B,C.

(B) Staining for a DNA damage marker gH2AX of skin sections from BrdU pulse-chase mice scheme shown in Figure 6A. Irradiated skin was used as positive control (CT) for the antibody staining.

(C) Boxplot of quantified DNA damage marker gH2AX data from BrdU pulse-chase sample images like those in (B).

(D) Measurements of IFE thickness based on K10<sup>+</sup> stains in skin from the BrdU pulse-chase experiment at time points indicated in Figure 6A.

(E) Images showing BrdU-labeled cells in scale or K10<sup>+</sup> interscale, from experiment in Figure 6A. Dashed line indicates interscale.

(F-M) Box plots showing percentages of BrdU marked cells in basal (F,G) or suprabasal layer (H,I), as well as of proliferation (J,K) and apoptosis (L,M), split per scale vs interscale from BrdU pulse-chase experiment sample images like those in (E).

(N-Q) Box plots showing percentages of BrdU marked cells (N), cell proliferation (O), apoptosis (P), or DNA damage (Q), comparing scale vs interscale in wild type (WT) skin.

(R) Immunofluorescence images for differentiation (K10), proliferation (Ki67), cell apoptosis (Caspase3), or DNA damage (gH2AX) marker from WT or Sox6 iKO back skin samples harvested 30 days post-tamoxifen induction.

(S-U) Boxplots of cell proliferation (S), apoptosis (T), or DNA damage (U) data quantified from 30-day post-tamoxifen induction skin samples images like those in (R).

Data information: In box plots central band is the mean value, and the top indicates 25th percentile while the bottom indicates 75th percentile. Whiskers indicate minimum and maximum values in the data, with dots indicating potential outliers. Linear mixed model statistical test was used with data from 18 images from 3 biological replicates.

## Appendix Tables

**Table S1: Characterization of all the human samples used in the study:**

| Human Samples | Site on Body    | Age | Slc1a3                | Frequency of patches (Dermal papillae vs rete ridges)          | K15                                                           | Ki67 staining                       | Vamp1                                                                                    |
|---------------|-----------------|-----|-----------------------|----------------------------------------------------------------|---------------------------------------------------------------|-------------------------------------|------------------------------------------------------------------------------------------|
| A             | Female Chin     | 61  | weak                  | very rare and small patches                                    | partially colocalised                                         | Not colocalised                     |                                                                                          |
| B             | Male Scalp      | 70  | Didn't work           |                                                                |                                                               |                                     |                                                                                          |
| C             | Male temple     | 66  | Moderate              | Few patchy regions (abnormal skin)                             | Co-stained with Slc1a3                                        | Co-localised in some regions        |                                                                                          |
| D             | Male Cheek      | 59  | Strong                | Patches around keratin pearls                                  | Not clear                                                     | Ki67 underneath                     |                                                                                          |
| E             | Male ear        | 88  | Strong                | Frequent Patches around keratin pearls and tips of rete ridges | Co-stained with Slc1a3                                        | excessive Ki67 (tumor-like)         |                                                                                          |
| F             | Female forehead | 82  | Very strong to strong | Few Patches in the flattened epidermis                         | With or without Slc1a3                                        | -                                   |                                                                                          |
| G             | Male ear        | 76  | Moderate              | small intense patches                                          |                                                               |                                     |                                                                                          |
| H             | Female Scalp    | 76  | Strong                | Very rare and small patches                                    | Co-stained with Slc1a3                                        | Very few positives                  |                                                                                          |
| I             | Female forehead | 75  | Very strong           | Mostly infundibulum and tips of epidermis                      | opposite to K15                                               |                                     |                                                                                          |
| J             | Male Scalp(SCC) | 82  | Didn't work           |                                                                |                                                               |                                     |                                                                                          |
| K             | Male Ear        | 79  | Didn't work           |                                                                |                                                               |                                     |                                                                                          |
| L             | Male cheek      | 81  | strong small patches  | Sometimes in dermal papillae (not clear as the skin is flat)   | Strikingly opposite to K15 at some places (2 out of 6 images) | In patches more frequently near K15 | Exclusive of K15 (5 out of 9 images) remaining 4 images show co-staining but K15 but not |

|                 |                 |    |                              |                                                  |                                                               |                                                          |                                                                                      |
|-----------------|-----------------|----|------------------------------|--------------------------------------------------|---------------------------------------------------------------|----------------------------------------------------------|--------------------------------------------------------------------------------------|
|                 |                 |    |                              |                                                  |                                                               |                                                          | completely co-localised, K15 is present in rete ridges where Vamp1 expression is low |
| M               | Male arm        | 59 | Moderate                     |                                                  |                                                               |                                                          |                                                                                      |
| N               | Female forehead | 90 | moderate                     | Keratin pearls and dermal papillae               |                                                               |                                                          |                                                                                      |
| O               | Male scalp      | 82 | moderate                     |                                                  |                                                               |                                                          | Vamp1 colocalise with K15 to some extent in the dermal papillae                      |
| P               | Female Scalp    | 60 | very small to longer patches | extends across the flat rete ridges              | K15 is highly intense in rete ridges                          |                                                          | Vamp1 colocalise with K15 to some extent in the dermal papillae                      |
| Q               | Female Forehead | 57 | small patches                | in rete ridges                                   | K15 seems to be present in dermal papillae occasionally       |                                                          | Vamp1 colocalise with K15 to some extent in the dermal papillae                      |
| R               | Male ear        | 80 | Didn't work                  |                                                  |                                                               |                                                          |                                                                                      |
| S               | Male temple     | 65 | Lack of epidermis            |                                                  |                                                               |                                                          |                                                                                      |
| T               | Male neck       | 70 | strong small patches         | Long stretch at some regions                     | K15 is extended across the rete ridges colocalise with Slc1a3 | In patches more frequently under K15 BL                  |                                                                                      |
| U               | Male arm        | 85 | Weak to moderate             | small patches                                    | rete ridges and junctions between dermal papillae and ridges  | K15 colocalises with Slc1a3 even through dermal papillae | Vamp1 is occasionally present in rete ridges along with K15                          |
|                 |                 |    |                              |                                                  |                                                               |                                                          |                                                                                      |
| Newborn (6)     | Foreskin        |    | Moderate                     | Homogenous expression throughout the basal layer | Homogeneous                                                   | very abundant                                            | Also Homogenous                                                                      |
| 21 year old (2) | Breast          |    | High around rete ridges      | Correlated with Slc1a3 at some patches           | Present in rete-ridges and DP junctions                       | Present in basal and suprabasal layers                   | in Inter-ridges                                                                      |

|             |           |  |                                       |                               |                        |                                        |                                |
|-------------|-----------|--|---------------------------------------|-------------------------------|------------------------|----------------------------------------|--------------------------------|
| 30 year (2) | breast    |  | Strong patches at tips of rete ridges | Mostly co-stain with Slc1a3   | Present in rete-ridges | Present in basal and suprabasal layers | in Inter-ridges                |
| 33 year     | breast    |  | Tips of rete ridges                   | Mostly co-stain with Slc1a3   | Present in rete-ridges | Mostly suprabasal                      | in Inter-ridges                |
| 41 year (2) | breast    |  | Didn't work                           |                               |                        |                                        |                                |
| 45 year (2) | abdominal |  | moderate at rete ridges               | Mostly co-stain with Slc1a3   | Present in rete-ridges | Mostly suprabasal                      | in Inter-ridges                |
| 52 year old | abdominal |  | moderately lost; flattened skin       | Correlated with Slc1a3 is low | Present in patches     | lost significantly                     | in Inter-ridges to some extent |

Table S2: Bulk-RNAseq genes

| Tail Skin |          |           |          |            |            | Back skin |          |          |         |            |            |
|-----------|----------|-----------|----------|------------|------------|-----------|----------|----------|---------|------------|------------|
| Aspm_T<1  | Aspm_T>1 | Dlx1_T<1  | Dlx1_T>1 | Slc1a3_T<1 | Slc1a3_T>1 | Aspm_B<1  | Aspm_B>1 | K14_B<1  | K14_B>1 | Slc1a3_B<1 | Slc1a3_B>1 |
| GREM1     | SYT4     | FABP4     | RASSF2   | GREB1      | KPRP       | LMCD1     | TACR3    | FBLN2    | PLPPR4  | NR1H4      | CLDN3      |
| IL31RA    | COCH     | DIPK1C    | IL18     | LPAR1      | MYO5C      | EYA2      | IL10RA   | PPP1R16B | DAB2    | MC3R       | RGS1       |
| SORBS2    | BEAN1    | FBXL7     | SULT4A1  | CCL2       | ACSBG2     | CD34      | FADS2    | KCNE4    | USH1G   | NKX2-1     | WNT2       |
| SYNPO2    | CLCA1    | TMEM47    | PALM2    | RASGRF1    | RNF223     | C2orf88   | FAM19A3  | GRID2IP  | SPINK6  | SELE       | CNTNAP2    |
| GPRC5D    | FGL2     | SNX10     | VWCE     | CA8        | GFRA3      | LHX2      | ALDH3B1  | DIPK1C   | NKX3-2  | PLPPR4     | SYCP1      |
| WIF1      | SPI1     | CCL7      | FSD1     | SLC27A6    | DNAH3      | DAB2      | PCDH17   | PCDH19   | APOBEC1 | GATA2      | CD3D       |
| FBN1      | TARM1    | KRTAP26-1 | MRC1     | VIT        | KBTBD12    | GREB1     | TBC1D30  | RGS18    | SCARNA8 | TAS2R60    | LNP1       |
| VIT       | ERP27    | PTGER2    | SLC2A2   | DIPK1C     | AGR3       | MYO5C     | CYBB     | MFRP     | PEX5L   | CRB2       | CCDC60     |
| AMER2     | CCDC177  | CLDN15    | CCDC198  | C9         | ADGRG3     | FSTL1     | MRC1     | MTCL1    | COL6A5  | USH1G      | BDNF       |
| MIR186    | NCKAP1L  | SELP      | MMEL1    | LRRTM4     | ACTA1      | LRRRC4    | POU2F2   | ASTN1    | MROH7   | LEAP2      | WSCD2      |
| SLC35D3   | LRRRC10  | MMRN2     | FGG      | PKD1L3     | NRAP       | PTPRB     | TMEM271  | TMEM74B  | HYAL4   | GABRB2     | GABRA4     |
| PHEX      | HRASLS   | ARMCX6    | RGS5     | KIF1A      | S100B      | FABP4     | OSR2     | LRRN1    | IL23R   | GRIN2B     | GCKR       |
| DACT1     | PRR29    | ZFP37     | PTPN7    | ARMCX2     | MYL7       | IL31RA    | GPR171   | GRIA3    | SFTPC   | BCAT1      | PHEX       |
| CHST13    | LOXL1    | GFRA1     | BIN2     | IL1A       | CILP       | CD36      | C5orf52  | CNKSR2   | NOS1    | MGAT4C     | SERPINB13  |
| SLC4A5    | SNORD73B | FGD5      | NOXA1    | CACNA2D2   | NFASC      | FBLN5     | GJB1     | SDSL     | SHISA4  | LRCH2      | ST8SIA4    |
| HOXD13    | TM4SF4   | ACKR1     | CEL      | SLCO2B1    | UNC80      | FBLN2     | APOA1    | CHI3L1   | RASSF2  | GRM2       | FGF7       |
| ST6GAL1   | SLC17A8  | CYTL1     | CCDC105  | FZD4       | CLDN7      | DIPK1C    | SLC14A2  | ITM2A    | ST8SIA4 | CDH12      | RF00019    |

|           |           |         |          |          |           |           |           |          |         |          |         |
|-----------|-----------|---------|----------|----------|-----------|-----------|-----------|----------|---------|----------|---------|
| TLL9      | SCN1A     | IL18R1  | RF02271  | NPTX1    | GCNT4     | NKX2-1    | ESPNL     | PCSK9    | RF00019 | FGR      | EDNRB   |
| CFAP54    | CA6       | WIF1    | NPM2     | FGFR4    | KIAA1211  | PPP1R16B  | EFHC2     | SH2D3C   | EDNRB   | GALNT15  | ANGPT2  |
| CRYBA2    | RNY3      | HIF3A   | CA7      | CNGB1    | KCNIP2    | KCNE4     | SLC9B2    | LYN      | ANGPT2  | VAX2     | SEBOX   |
| PCDHGA11  | CACNG1    | RAB33A  | LHX9     | HS6ST2   | HES2      | SELE      | PRDM1     | 4-Sep    | LRRC24  | BDKRB1   | KRT25   |
| EMILIN3   | HIST2H2AB | FGD3    | INSC     | ITGA1    | PROZ      | GATA2     | SMARCA1   | ENTPD1   | TSSK2   | LRRC3B   | HSD11B1 |
| SHD       | KCNS1     | LRGUK   | APLNR    | G0S2     | SPATA9    | S1PR1     | GLRA4     | ARHGEF15 | LY75    | NKX3-2   | CYP1A1  |
| CDH6      | C1QTNF3   | GRIA2   | ARL11    | SRPK3    | SLC44A4   | CA8       | STK31     | LNP1     | CLDN7   | SCARNA8  | ACTL9   |
| ALDH3B1   | TNIP3     | GALNT16 | GLP1R    | TMEM47   | POMC      | COCH      | SNORD121B | ACOT4    | KRT25   | FRZB     | RBP7    |
| KLHL41    | ARMC3     | SPINK6  | MS4A1    | PYY      | TH        | WIF1      | CCKBR     | CDH5     | ZNF641  | CDH20    | FBLN5   |
| CXCR4     | LRRC10B   | THSD7A  | MCHR1    | LY75     | LIMS2     | MGAT4C    | CD79A     | LINGO1   | KCND3   | GRIN2A   | DCLK3   |
| LDB2      | FBXO41    | DMC1    | PROK1    | ADCY4    | TMEM229A  | LRCH2     | PPP2R2B   | DLX1     | HHIPL2  | ZIC3     | KCNN3   |
| FIBCD1    | IL2       | GALNT15 | DOK6     | HOXC8    | OCA2      | FGR       | BHLHA15   | EBF2     | MAP7D3  | SEZ6L    | SLC18A1 |
| FBLIM1    | SLC25A34  | EMILIN2 | RIMS2    | CRISPLD1 | ZC3H12B   | KIF1A     | BOLL      | NWD2     | LCT     | CHRNA1   | TCHHL1  |
| TRPM6     | ARMC2     | TMEM217 | MPP4     | GJC1     | SLA2      | BDKRB1    | SLC16A12  | OPCML    | IL18RAP | RBP3     | PRKG2   |
| ABHD16B   | KIAA1755  | S1PR1   | KCND2    | ENPP3    | DPEP1     | TMEM47    | CRYBA2    | ADRA2A   | SLA     | UGT8     | MAP7D3  |
| SCARNA6   | ARMH2     | ARR3    | CAP2     | EPHB1    | SLC9A2    | SCARNA8   | NTRK3     | CFAP100  | SLC51A  | ESRRB    | IL18RAP |
| MAP3K13   | SEMA6B    | MIR26A1 | KDM4D    | GXYLT2   | HIST1H2BD | DNAH3     | TMEM44    | LRAT     | CCDC114 | PEX5L    | BFSP2   |
| EID3      | CCDC40    | PGLYRP3 | SCRT2    | FABP12   | CAPN3     | MTCL1     | ATOH1     | ZAP70    | KLK14   | ACTRT3   | ST3GAL5 |
| KIAA1614  | WDR93     | GABRB1  | SLC38A1  | ST6GAL1  | MTCL1     | FGL2      | FATE1     | STXBPSL  | GALNT16 | RGS21    | ARHGA40 |
| MAP1A     | CMA1      | SOX30   | MYL7     | GABRD    | FLG       | GRIN2A    | PAX5      | MMP16    | FLI1    | EPHA6    | CA2     |
| NTN3      | PROM1     | CCM2L   | LTB      | GNAT1    | RCAN2     | LRRN1     | NFE2      | CACNA2D1 | NR5A2   | KCNT1    | MFNG    |
| SLC1A2    | SYNPR     | SHISA7  | B3GALT2  | SPRY3    | ITGB1BP2  | KRTAP26-1 | SYNDIG1L  | ZNF521   | CDH6    | GDF2     | LYVE1   |
| GNG2      | NR2F1     | KRT26   | SYT13    | LCT      | HPX       | PTGER2    | CCER2     | ITGA11   | TNFSF8  | SLC18A3  | VCAN    |
| HIF3A     | MYT1      | AIM2    | TMEM150B | SYNPO2   | FAM71F2   | ACKR1     | SLC5A7    | EPHA7    | ZNF784  | COL6A5   | USH2A   |
| PRR15     | CXXC4     | MINAR1  | FBXL13   | FAT4     | C6orf222  | CNKS2R2   | RNU6-580P | WIF1     | APOA1   | RF02271  | TSGA13  |
| KRTAP15-1 | MAP3K15   | HFM1    | SLCO1C1  | PPP1R9A  | ADM2      | HS6ST2    | TNFSF4    | KIRREL3  | LCP2    | NHLH2    | EREG    |
| SLC7A3    | C10orf90  | GIMAP1  | DMBT1    | NXPE2    | AMER2     | IL18      | CD244     | HIST1H1B | FAM83E  | AMBIP    | KCNJ6   |
| FOXP3     | HGFAC     | CADM3   | LUM      | SLA      | DTNA      | LYN       | SORCS3    | FBN2     | ATP8A2  | CDH19    | RAB39A  |
| TEX14     | NOVA1     | CHST1   | HPD      | SCNN1G   | KCNH6     | SLC35D3   | WFDC1     | GNG11    | KRT73   | MROH7    | CDH22   |
| THEGL     | ONECU2    | PODXL   | FKBP6    | LRRC8C   | FNDC11    | SELP      | SLAMF1    | PTPN18   | IL17F   | HYAL4    | TRIM36  |
| UPK3B     | HPD       | ISLR    | TBX15    | HOXB13   | CELA1     | SULT4A1   | CD69      | RNF125   | CCDC40  | IL23R    | IL5     |
| NES       | C1QB      | TESPA1  | SLC6A11  | CCDC114  | SPATA17   | PALM2     | RS1       | C1QA     | TRPM6   | C1orf158 | OMG     |
| EIF4EBP3  | C11orf87  | FAM180A | PAX6     | GPC6     | TEX54     | 4-Sep     | RN7SKP197 | SCUBE1   | LHFPL4  | ZFPM2    | KCND2   |

|            |            |          |          |          |         |           |          |           |           |            |          |
|------------|------------|----------|----------|----------|---------|-----------|----------|-----------|-----------|------------|----------|
| PLD6       | ARL11      | C1orf115 | TMEM26   | TTC21A   | BST1    | LRRRC24   | RRAGB    | GALNT13   | FAM184B   | OR13C8     | FIGN     |
| HTRA4      | MYO1G      | HHIPL1   | EBI3     | INPP5J   | SLC8A2  | MMRN2     | GYPC     | SV2B      | CMA1      | GABRA1     | CDH8     |
| FAM217A    | PTGIS      | EYA1     | VNN3     | NRCAM    | CREB3L3 | SLC10A6   | SPNS3    | RGS5      | TFR2      | RORB       | CPA6     |
| GPRIN1     | ASB2       | RFX8     | MMP9     | MIR186   | MMP24   | ENTPD1    | INA      | SYT14     | MAK       | OLIG3      | HHIP     |
| DTNA       | ARHGA P20  | PTGDR2   | GLTPD2   | PRDM6    | CDH15   | ARHGEF15  | CACNA1F  | FLT4      | SCARNA6   | SALL1      | TNFSF8   |
| ARL13A     | TYROBP     | TRIM17   | AREG     | TRAF3IP3 | CD86    | NRAP      | KRTAP7-1 | TEK       | CAPN3     | USP44      | ADORA3   |
| C20orf144  | RFTN2      | RAB17    | CXCR5    | TNFAIP6  | B4GALT6 | S100B     | MINAR2   | PLD5      | HS6ST2    | AGMAT      | C7       |
| IGF2BP2    | PTPRR      | SLAMF9   | VIL1     | IL4      | GNG11   | UNC80     | ZAN      | RGS7      | AIM2      | EBF3       | MOGAT1   |
| FSTL4      | REC8       | FUT9     | P2RY4    | PLEK     | DSCAML1 | EMCN      | EDNRB    | SHD       | RCAN2     | PDGFRL     | PPP1R9A  |
| KCNH4      | SDSL       | IQCA1    | ASB11    | SCNN1B   | PWWP3B  | JAM2      | STUM     | OMP       | MAMD C2   | SCARNA11   | BHLHA15  |
| TIE1       | LEAP2      | RNASE12  | STUM     | MLXIPL   | SLC19A3 | NHLH2     | SHISAL1  | NEK5      | TESMIN    | ARHGA P15  | FAM83E   |
| RNF182     | MCOLN2     | LRRTM4   | LHX3     | CCK      | HPD     | ADCY4     | SMIM32   | PODNL1    | BTBD18    | SFTPC      | ACOX2    |
| XCR1       | TRIM67     | GRM7     | ARHGAP30 | CCL24    | ADORA3  | CDH5      | KRT84    | HSD17B13  | INSM2     | NOS1       | ATP8A2   |
| C13orf42   | VSTM2A     | EGR4     | SLC25A34 | GRXCR2   | SNX31   | CRISPLD1  | DGKG     | SLC38A5   | ARHGE F25 | MIR200C    | KRT84    |
| AC020613.1 | KIAA1324   | SERPINI1 | ERP27    | RYR2     | ACTBL2  | LINGO1    | NR5A2    | COLGALT2  | GABRR2    | SFRP4      | SLC45A2  |
| LANCL3     | SLC41A2    | KCNU1    | LRIT1    | Z98752.3 | ERBB4   | FGD5      | MMP13    | FAM228A   | GNG2      | ANKS4B     | DMTN     |
| ZNF853     | GABRA4     | TSPYL5   | TRIM50   | NCF4     | CLCN1   | KCNB1     | MAP7D2   | PODXL     | SMIM22    | SNORA12    | ADCY2    |
| M1AP       | FAP        | SNPH     | MIR181C  | PTPN5    | CPA3    | SNORD73B  | NHSL2    | SLAIN1    | CLIP3     | RNU6-1109P | SGIP1    |
| NPM2       | RNASE6     | PIGR     | GALNT17  | TBC1D30  | FAM107A | ENPP3     | NTN3     | CADM2     | COL14A1   | CCDC158    | ART5     |
| OTOGL      | TMPRS S11A | SHOC1    | MDGA2    | ADAMT S3 | RGSL1   | CYTL1     | STAC2    | TENM1     | APLNR     | LRRC4C     | C1orf146 |
| FGD3       | GPIHBP1    | ADGRL4   | CCL22    | CNN1     | RF00026 | CLDN3     | CPNE1    | NTRK3     | SPACA1    | PAX2       | TNNT1    |
| HES2       | PSCA       | STGGAL1  | FAM237B  | CD3D     | NHLH2   | CFAP100   | GSC      | LEAP2     | C20orf96  | VSX2       | CD19     |
| GNG4       | LMOD2      | PIK3R5   | C16orf54 | HHATL    | KCNH4   | FAM107A   | ATP8B3   | SLC6A15   | MCHR1     | VSTM2L     | LY9      |
| AC055839.2 | LTF        | PHYHD1   | SLA2     | SLC38A5  | GFY     | CA6       | TNFSF12  | MME       | LANCL3    | LTA        | IL17F    |
| DPT        | KRT20      | CAMK4    | FSD2     | SOX18    | HGF     | LRAT      | LRRC15   | CACNG2    | MCOLN2    | ROS1       | MGAM     |
| TAS1R1     | TMEM145    | SBSPON   | MIR26A2  | UPK2     | EDNRB   | EBF3      | IMPG1    | XIRP2     | KCNF1     | TLL2       | CRMP1    |
| MAP7D3     | MDGA2      | EFHD1    | MYPN     | PCDHGA1  | COL28A1 | ZAP70     | C8A      | SOBP      | EMX2      | SELL       | CNTN2    |
| GCNT7      | PIGR       | IGF2BP2  | GUCA1B   | GIPR     | GRIA3   | SPRY3     | PCDH8    | TRHDE     | GPRIN1    | TRPC7      | CREB3L3  |
| GALNT9     | MYH7       | ZNF423   | MASP2    | SYPL2    | MAP6D1  | CACNA2D1  | LMOD1    | CSMD1     | GJB1      | RNU1-43P   | JCHAIN   |
| LYL1       | SLC44A4    | TSPAN15  | GRID2    | NPB      | NMNAT2  | ZNF521    | UTS2     | KCNC1     | GPAT2     | FBN1       | FAM184B  |
| AGTR2      | CHP2       | TRIM36   | SPAAR    | CARMIL3  | APLNR   | HIF3A     | APOD     | CLGN      | NT5C1B    | IGF2BP1    | TFR2     |
| CORO6      | MYH11      | CITED1   | CAPN11   | PLA2G4B  | SLC6A3  | ARHGA P15 | STK32A   | RN7SKP127 | MMP24     | KCNH8      | ESR2     |



|          |            |          |          |            |            |            |             |           |           |           |           |
|----------|------------|----------|----------|------------|------------|------------|-------------|-----------|-----------|-----------|-----------|
| STC2     | NHLH1      | PCDHG B1 | ATP8B3   | BTBD18     | LYL1       | RAB33A     | FRMD5       | OTOP1     | CLMP      | TSSK2     | THBS4     |
| MAL      | KCNJ10     | AKAP6    | STX1B    | SRPX       | TREH       | CYR1       | MYO16       | S100A2    | RNASE1 2  | CPNE6     | SAP25     |
| PTPN22   | SLIT2      | PKHD1L 1 | NID2     | RTL5       | RASL12     | SFTPC      | MIR708      | MDGA2     | B4GALT 6  | GATA4     | RNF183    |
| UCP3     | KIAA15 49L | MOS      | CYTIP    | SBSPON     | METTL2 4   | RNY3       | SLC9A2      | SOD3      | RAB26     | ADGRA 1   | ZGLP1     |
| TFPI     | SLC26A 7   | SYT5     | MLANA    | MISP       | RETN       | FAT4       | DCLK2       | TECTA     | SYT5      | ATOH1     | GABRR 1   |
| TTL6     | NELL2      | EID2     | NCCRP1   | BMPER      | MAP7D 2    | HIST2H 2AB | KRT76       | RFLNA     | TH        | R3HDM L   | PLD5      |
| SV2C     | FRMPD 3    | HTR6     | TEX49    | KSR2       | SMIM4 1    | AKAP12     | COL9A2      | CMBL      | SERPINI 1 | SERPIN D1 | PHLDA2    |
| TET1     | ZNF366     | TMPRSS 6 | GUCY1B 1 | SAMD1 5    | RNF207     | SLA        | ARR3        | EMCN      | PSMA8     | ZNF641    | DNAH1 0   |
| RASGRP4  | PTX3       | FIBCD1   | PADI2    | CXCL10     | ADAMT S19  | FBN2       | LEAP2       | GFRA2     | CRISP2    | SPARCL 1  | HS6ST2    |
| DOK2     | NXNL1      | PARVG    | CD79A    | DSG4       | PJK        | GNG11      | STXBP5L     | TMEM13 2C | SH2D6     | MYH7B     | FEZF2     |
| GPR22    | SLITRK1    | SLC41A 2 | MMP12    | RASSF4     | BCL2L1 0   | CCDC11 4   | CPS1        | SLC29A4   | LTF       | GLRA2     | PRR9      |
| PGLYRP2  | ZP1        | CCDC40   | OCA2     | KRT8       | C2orf74    | ADGRL4     | CD48        | SNORD15 A | PRTN3     | MIR150    | TRANK1    |
| LRRTM4   | TMPRS S12  | PSD2     | TECTA    | C1QTNF 6   | FRMD7      | SLC2A2     | HTR1F       | PRR9      | C9orf43   | KCND3     | KRT36     |
| PNMA2    | GHSR       | KLF14    | SNORD6 6 | BHLHA9     | LMX1A      | INPP5J     | CADM4       | ILDR2     | SPATA1 7  | MIR26B    | RF0002 6  |
| HIST1H4E | SPACA4     | IL17C    | PJK      | KCNG2      | LGI2       | PROZ       | C4orf54     | RARRES2   | ITK       | PCDHA 10  | GFPT2     |
| HTR1B    | MIR193 B   | CD96     | CARD11   | CD163      | SKOR1      | NRCAM      | SNORD7 1    | PGBD5     | CAMK4     | CD300L G  | HNF1A     |
| ARR3     | CLHC1      | HRC      | ALPK2    | BRINP1     | GFPT2      | SV2B       | THEMIS      | C21orf62  | XIRP1     | PTGDR2    | RECK      |
| CCDC168  | NGB        | GULP1    | MAT1A    | NACAD      | RNU6- 384P | SPATA9     | ITGBL1      | DIO3      | PIWIL1    | PCDH12    | TMEM1 32C |
| SLCO5A1  | CD3D       | SMIM2 2  | SLC45A1  | STRIP2     | RNF17      | ANKS4B     | OLR1        | NTNG1     | EFHC2     | PCSK2     | CD180     |
| GUCY1B1  | SPATA4 6   | HEY2     | FSCN3    | TACR1      | MYL10      | TEK        | ATP8A2      | UPK2      | M1AP      | FOXB1     | GPRASP 2  |
| COX4I2   | CD19       | WFIKKN 2 | SEMA5B   | ATP2A3     | DYNLRB 2   | TRAF3IP 3  | TUBAL3      | RNF182    | NPW       | RYR2      | GALNT1 4  |
| FUT4     | SLC1A1     | LRRC10   | RGS17    | LIPH       | FOLR1      | SHD        | FGF17       | DBN1      | AVPR1 B   | PTCH2     | CST7      |
| ST18     | PEAR1      | TENT5D   | CCN5     | FAXC       | PCDH15     | PODNL 1    | CCN5        | SPATA9    | SH2D2 A   | PKD1L2    | ATG9B     |
| OLFML2B  | LTA        | PGR      | FOLR1    | IL23A      | SNORA 23   | LBX2       | AKAP3       | PLCH1     | DPT       | ASXL3     | HK3       |
| B3GALT2  | C17orf6 4  | OMD      | GRM6     | ATG9B      | DNAJB7     | COLGAL T2  | LRFN5       | TRAF1     | TUBB4 A   | SEMA4 F   | PLA2G4 D  |
| CRHR1    | GDAP1 L1   | CCT8L2   | SOWAH D  | SOX11      | TSPYL5     | PODXL      | IL19        | ZIC3      | GRIK2     | CLIC6     | COL14A 1  |
| ZC3H12B  | LHFPL4     | NTNG1    | SLC16A5  | RNU6- 58P  | RSAD2      | GIMAP4     | FABP2       | JSRP1     | S100A8    | TMPRSS 6  | CFAP44    |
| GPM6B    | SEZ6L      | SLC27A 2 | GLDN     | KRTAP1 5-1 | HEY2       | THSD7A     | PTCHD3      | GAD2      | CHSY3     | PTPRB     | SLAMF8    |
| SYNC     | TEX101     | CCRL2    | GPR1     | CHRM5      | MAPK8I P2  | SLAIN1     | OR6B1       | KCNG2     | APOA2     | RTL9      | MC5R      |
| CSRNP3   | KLK14      | CCN3     | PROKR2   | CFAP52     | THEMIS     | MMEL1      | RNU6- 1122P | GPR179    | CORO6     | COL9A2    | PLEK      |
| WDR86    | GCA        | SLC17A 8 | PLPPR4   | C4orf54    | GPR22      | CADM2      | KCNK3       | SEMA5B    | STC2      | ADGRB 1   | GPR171    |
| TDRKH    | NLGN3      | VGf      | NT5C1A   | CMA1       | ADAP2      | DMC1       | MYH11       | CACNG3    | ENO4      | ACCSL     | ADGRF3    |
| EFCAB13  | ADCY2      | GPR4     | ADCY8    | GPR75      | AK9        | POMC       | FGB         | CNTN3     | MAL       | FAM13 1B  | SLC28A 1  |

|               |             |               |                |              |              |              |                |              |              |              |              |
|---------------|-------------|---------------|----------------|--------------|--------------|--------------|----------------|--------------|--------------|--------------|--------------|
| NKAIN3        | TRPM5       | DDX25         | CTNNA2         | PRSS35       | C1QC         | IL2          | IKZF3          | HTR2C        | TRIM22       | MAB21<br>L1  | FBXO39       |
| INSM1         | SEC14L<br>5 | DMRT2         | CCR7           | LIPN         | STK32C       | TMEM2<br>17  | AC00873<br>6.1 | NRK          | HKDC1        | SLC51A       | TTR          |
| EMID1         | S1PR1       | EFCAB1<br>2   | NEUROD<br>1    | MME          | PRDM1<br>3   | PAX2         | CCR2           | MEIG1        | LMLN2        | DPEP1        | NID2         |
| CAPN11        | ACRV1       | JAM3          | C1orf100       | TRIM17       | AQP5         | VSX2         | F2RL2          | NID2         | CCDC15<br>1  | SLC36A<br>2  | GIMAP8       |
| SAMD15        | HAPLN<br>4  | SUCNR1        | EFR3B          | CACNA<br>1E  | CYP8B1       | KLHL41       | RNU6-<br>1304P | TTC21A       | HUS1B        | SLITRK5      | ETV1         |
| RCN3          | SCG5        | FBLN5         | ARL13A         | PDIA2        | DMRTA<br>2   | SOBP         | IYD            | CNGB1        | SNORA<br>11  | TRIM63       | SCN11A       |
| NXPE3         | ACVR1<br>C  | CRB2          | APBA2          | GPAT2        | PRR29        | SOD3         | BICD1          | USH2A        | IKZF1        | ITIH1        | FCRLA        |
| BCAS1         | EPHA5       | UPK3B         | CD86           | NHSL2        | CNGA4        | TECTA        | VEGF           | GGN          | DOK2         | KLK14        | DMRTA<br>1   |
| NXPE4         | ITGBL1      | RCN3          | TSPAN10        | ATP13A<br>4  | HAND1        | Z98752.<br>3 | BAIAP3         | NAALAD2      | TTBK1        | CD36         | DOK7         |
| POPDC2        | NEGR1       | UCP3          | CTSS           | C17orf9<br>9 | HORMA<br>D2  | KIAA17<br>55 | POU1F1         | NFATC4       | ASB14        | BARHL1       | KCNF1        |
| FAIM2         | NID2        | P2RY14        | TDO2           | SYN1         | FABP1        | SEMA6<br>B   | UNC5D          | GRIN3A       | VIL1         | PLLP         | EMX2         |
| BHLHE22       | MMP2<br>7   | NCF1          | KCNAB1         | SYT5         | TMEM7<br>1   | BDNF         | PNPLA5         | REEP2        | NGB          | LRG1         | OPRL1        |
| PSD2          | DNAH9       | TBXAS1        | KCNT2          | TNNI3        | RUNX1T<br>1  | KRT73        | CYP2F1         | SCUBE3       | HEY2         | TNNT3        | ZKSCAN<br>2  |
| IL18RAP       | ILDR2       | GUCY2C        | RF00019        | TRPV2        | KCNE2        | TRIM46       | ATP13A5        | KLHL13       | HSD11<br>B2  | DNAH1        | C9orf15<br>2 |
| MLIP          | C1QC        | TP53TG<br>5   | EFCAB13        | ZNF423       | GRIA2        | MECO<br>M    | P2RY10         | GPR85        | KCNMB<br>4   | OASL         | PROCR        |
| WEE2          | ADAD1       | KRT72         | EFCAB9         | GRIK2        | PFN4         | WSCD2        | NAALAD<br>2    | CHST13       | GGT7         | COL15A<br>1  | CSMD1        |
| BDH2          | LMLN2       | PDE1A         | TNMD           | MYO15<br>A   | ADGB         | GUCY1<br>A2  | RNU4-<br>89P   | ANKRD34<br>B | GNG8         | DISC1        | LRRC27       |
| TNFRSF13<br>C | PDPN        | MELTF         | NCAN           | PRUNE2       | SLC45A<br>2  | NCF4         | SERPIND<br>1   | PLEKHG1      | ADIG         | HAND1        | S100G        |
| ZFP92         | SNORA<br>23 | OLR1          | A2M            | ACKR2        | METTL2<br>1C | SNORD<br>15A | PLK5           | ADAMTS<br>5  | C1QTN<br>F7  | ILDR2        | SMYD1        |
| LIX1          | SCARN<br>A1 | ECEL1         | PMIS2          | DOCK10       | SLC7A1<br>4  | S100Z        | SAMD15         | AK5          | LY6G6D       | FLI1         | SSMEM<br>1   |
| BIK           | FGA         | FGFR4         | RF00153        | FAM22<br>2A  | C1orf15<br>8 | ILDR2        | S100A8         | CCDC105      | HIF3A        | SLC22A<br>3  | MYOG         |
| PPP2R2B       | APOB        | TRPV1         | DCHS2          | CRHR2        | ESRRB        | SPO11        | PLD5           | HOXD8        | KMO          | ANO4         | C3           |
| STPG2         | TSPAN1      | RTL9          | GNRHR          | PHOX2<br>B   | C1QTNF<br>3  | DPEP1        | POU5F2         | C9           | ARL13A       | NR5A2        | PVALB        |
| HPCA          | LGALS2      | GNG11         | RIBC2          | CCL17        | SLC41A<br>2  | MIR26A<br>1  | SEC14L5        | SCARNA2<br>2 | PCDHB<br>6   | POU1F1       | TMEM2<br>71  |
| LRRN3         | FLI1        | INSYN2<br>B   | CER1           | PGBD5        | ZFH4         | CLDN5        | HFM1           | FNDC8        | DYNLR<br>B2  | TRAPPC<br>3L | PRF1         |
| IL17C         | MMP2<br>4   | SOX18         | RGS8           | GASK1A       | SLAIN1       | SELENO<br>V  | ABCD2          | SPARCL1      | HIST1H<br>4E | MSI1         | CLMP         |
| TESPA1        | SGCE        | ABCA8         | SLC45A2        | STRA6        | TSSK2        | SIM1         | STAT4          | MYH3         | MAPK8I<br>P2 | ZNF784       | RLG3         |
| C11orf96      | PALM2       | SLC22A<br>3   | SPOCK1         | LRRC10<br>B  | NRXN3        | WDR93        | PRDM6          | ADAM23       | HTR1B        | APOA1        | RAB26        |
| SYTL5         | STARD6      | FCER2         | DDI1           | LHFPL4       | TAT          | LHFPL4       | IL9R           | PLA2G5       | GALNT<br>17  | C21orf6<br>2 | SYNPR        |
| LRRC36        | FAM10<br>7A | FAM22<br>8A   | ZBP1           | LTB          | CFAP22<br>1  | ADAMT<br>S3  | AVPR1B         | GRIN2A       | SNORD<br>59A | FRMPD<br>4   | STARD8       |
| GPR37L1       | FEZF2       | RNU6-<br>431P | AC02107<br>2.1 | TNFSF1<br>8  | AKR1D1       | KMO          | BTK            | PAX2         | CNTF         | PKD2L1       | ISL2         |
| DCLK2         | B3GNT<br>5  | INPP5J        | SPRR4          | NPW          | BTBD16       | TRPC7        | ISX            | RGS17        | CALHM<br>6   | DGKB         | LRP11        |

|          |          |           |          |         |          |          |          |         |           |          |           |
|----------|----------|-----------|----------|---------|----------|----------|----------|---------|-----------|----------|-----------|
| FREM1    | CCN5     | CHRN4     | SNORD73A | TENM3   | OR4K5    | NTNG1    | NLRP3    | LRR6    | CCL22     | NEFL     | ISLR2     |
| GRIA3    | LMO3     | PID1      | TRPV2    | GPR162  | GPR88    | RNF182   | RF00091  | BHLHE22 | HIST1H2BM | STRIP2   | CTHRC1    |
| TNF      | ABCC9    | CSRNP3    | CD53     | CLCA1   | LRCOL1   | SOX18    | CFAP44   | DCX     | INA       | CDH5     | WDR86     |
| ZSWIM5   | TRPC6    | ZNF697    | MYH7B    | SLC13A4 | FSIP2    | MYT1     | SPATA17  | GPR83   | STYK1     | ASZ1     | LOXL1     |
| LRIT1    | PDGFD    | DGKI      | PGF      | CCDC65  | DSCAM    | CXXC4    | AQP5     | APOA4   | CPNE1     | PCDHGA3  | ERP27     |
| CIB3     | CYP11A1  | SEZ6L     | HOXD13   | ATP7B   | RRH      | CCM2L    | HES2     | ACRV1   | NLGN3     | PAPPA    | PTPN7     |
| B3GALT1  | NEUROD1  | CYR1      | PRDM6    | CXCL11  | KCNS2    | CEL      | FILIP1   | ADGRB3  | SUCNR1    | F5       | SYN2      |
| FCMR     | IGSF21   | TEK       | GIMAP4   | P2RX2   | GUCY1A2  | TSSK2    | COL11A1  | SLC26A7 | PANX3     | HS3ST5   | SPATA17   |
| CNR2     | KCNA10   | RNF223    | GFI1     | LYVE1   | TRIM66   | CCDC105  | DDX3Y    | CRX     | ACVR1C    | TSGA10IP | PHOX2A    |
| FLT4     | SEC14L3  | CRMP1     | GPR37L1  | TTLL9   | CAPN8    | SEMA5B   | CORO2B   | GJA8    | FGF22     | RAD51AP2 | KCNC1     |
| ADAMTS15 | JAKMIP1  | KIAA1549L | GLRA2    | SOWAHB  | MMP12    | GPR179   | NOBOX    | OTUD6A  | CD48      | FGD5     | FRMPD3    |
| TNNT1    | SNORA54  | SHE       | LRR6     | PCSK2   | SRRM5    | NPB      | SLC7A10  | GPR174  | MYOZ3     | TRPM6    | SLITRK3   |
| KCNJ9    | GATM     | TOX       | CALCA    | OOEP    | PRRT1    | KCNK1    | FAM71D   | GRIA1   | FOXC2     | ADAMTSL1 | XIRP1     |
| SCRG1    | ITIH2    | COL4A3    | RNU4-58P | SMPX    | NTSR1    | GFI1     | SNORA5C  | SORCS1  | ZHX1      | ERC2     | PIWIL1    |
| CTXND1   | MYT1L    | TRIM66    | GRM3     | RASEF   | NSUN7    | USH2A    | ANKRD34B | MAPK4   | MIRLET7G  | ADAMTS5  | NAALAD2   |
| CHAT     | CALN1    | MYO1A     | RBPJL    | OMG     | OR8D4    | KIAA1614 | MOGAT1   | IQUB    | MASP1     | PABPC4L  | RRAGD     |
| CD160    | LMX1B    | ENTPD1    | ELANE    | TTBK1   | B3GALT5  | USHBP1   | PDE9A    | MYH15   | FRMD5     | ZNF423   | CFD       |
| INPP5J   | CFAP74   | KCNQ5     | NOS2     | SCIMP   | OXT      | NFATC4   | PLIN1    | CFAP44  | DLL3      | ADGRL4   | TNFSF15   |
| CCK      | IQCA1    | LRRTM2    | GRIA4    | DNAJC22 | ALB      | INSM2    | SLIT2    | SCN1A   | DUSP2     | LGI4     | CPB2      |
| PDE3B    | RPRML    | LHX6      | WAS      | GDF9    | NXPE4    | GIMAP1   | FZD9     | MOGAT1  | GUCY2C    | ADCY8    | DUOXA2    |
| SNORD73A | C9orf131 | RGS22     | RASGRP2  | PLA2G4D | SEMA3A   | CADM3    | UGT8     | ADCY2   | PRELID3A  | MAK      | ERICH4    |
| OR10V1   | DOCK2    | C12orf71  | PLPPR5   | LMO2    | TUBAL3   | RTL5     | SOX10    | NOVA1   | ZNF541    | KIF26A   | AFM       |
| ACTL9    | GRIA1    | PDE3A     | CD226    | SEZ6L   | BATF2    | REEP2    | TYRP1    | SYTL5   | CKM       | USHBP1   | TSPAN18   |
| SNORA58B | LRRN2    | LYPD4     | TMEM63C  | RASGRP1 | TAL2     | LHX9     | SLC6A11  | LRR36   | CALCA     | PCSK9    | APOB      |
| CACNA1F  | ASB17    | CCNB1P1   | LRFN5    | DPYSL5  | ATP13A5  | KSR2     | SPEF2    | CD300LG | TRIM69    | TEK      | AVPR1B    |
| CYBRD1   | BRSK2    | LRR55     | GRIFIN   | CD96    | STYK1    | MYBPC2   | MUC3A    | ABCC8   | CCDC68    | FND8     | SH2D2A    |
| ENPP2    | ANKDD1B  | TMEM200A  | OR13J1   | SLC17A8 | PCDHGA2  | GCKR     | HEMGN    | MIR99B  | MOAP1     | PRRT1    | BMP5      |
| SPN      | PLIN5    | TMEM179   | HS6ST3   | CD80    | SNORD73A | GIMAP6   | IQCH     | WNT1    | COLEC12   | CEMIP    | RNU6-376P |
| LUM      | C4BPA    | RFLNA     | KCNG1    | HSD11B2 | KLK12    | AK5      | ATP8B4   | RADIL   | MCMD2     | CRYM     | TUBB4A    |
| DACH2    | ANGPTL3  | NEK11     | CCDC151  | SCTR    | ACTC1    | SLC1A2   | ZBP      | POPDC2  | ZFP92     | ACTL6B   | SYT6      |
| PRM2     | ABCB4    | KCNV1     | SLC24A1  | PCDHGC5 | CNKS2    | KCNH6    | NUP62CL  | SHANK2  | CXCR6     | SYT16    | GDPD1     |
| CYS1     | DNAH6    | SPINK14   | CHRNA3   | TEX38   | MMP25    | C1orf115 | CCDC30   | CCN6    | KIRREL2   | MAMD2    | GRIK2     |

|          |           |            |            |            |          |          |            |            |           |          |           |
|----------|-----------|------------|------------|------------|----------|----------|------------|------------|-----------|----------|-----------|
| ENKUR    | CNDP1     | DOCK2      | KLHDC9     | GPR182     | RNF125   | OLFML3   | ARFGF3     | FBXO41     | FCER2     | NECAB1   | SMARCA1   |
| SLAIN1   | MIR148B   | CLHC1      | GAD1       | PKIB       | MYO1F    | SCARNA22 | MMP16      | RNF207     | ADGB      | TMOD1    | VIPR2     |
| TFR2     | CTSE      | AC020613.1 | HECW1      | NRXN1      | CACNA2D3 | TACR1    | SYNGR3     | TMEM255A   | TSPAN1    | FIBCD1   | TMPRSS9   |
| FOXS1    | FGG       | TMEM82     | MYT1L      | KCNN2      | BFSP2    | NAP1L5   | OR2I1P     | IL31RA     | CHRNA4    | FMN2     | CCNB1P1   |
| TACR3    | SYNGR3    | MEOX1      | PCDHA10    | GABBR2     | SLC7A3   | APLNR    | AL353572.3 | FGD5       | STPG2     | FPR1     | EFCAB13   |
| DISC1    | CCDC89    | SMIM18     | STARD6     | SLC11A1    | EBF4     | MIR339   | LRR10      | PPM1J      | TNFSF4    | SOX1     | CNTN4     |
| SLC5A5   | ATP2B2    | AC007906.2 | SLC9A3     | TNFAIP8L2  | TRIM63   | PTGIS    | GRXCR2     | GDF10      | RRH       | GABRR2   | SCN1A     |
| ACTC1    | TMEM262   | TNFSF13    | HKDC1      | C12orf56   | CSMD3    | FNDCC8   | NAP1L2     | HTR2A      | FAXDC2    | GABRA2   | SCIMP     |
| TEX35    | GABRR2    | COL6A6     | LYPD2      | CPNE1      | ST8SIA2  | SPARCL1  | GBGT1      | AC055839.2 | MPP4      | CYP19A1  | GRIA1     |
| LSMEM1   | PSPN      | VWF        | WFDC1      | MIR365A    | PRKG1    | ATP2A3   | FGL1       | GPR173     | CX3CR1    | C1QL1    | CY5R2     |
| GPR156   | PAX6      | ATF7IP2    | MRPL53     | CLDN20     | FATE1    | ST8SIA4  | ALDH8A1    | BMP6       | KRTAP16-1 | MYBPC3   | SLIT2     |
| CLIC6    | NTNG1     | ADAMTS3    | AC010616.1 | RNF182     | MFAP5    | MYH7B    | GRIK3      | NUGGC      | SLAMF7    | SMIM22   | SLC9A3    |
| ASGR1    | ZMAT4     | EGFLAM     | AIRE       | GRIK3      | OOSP2    | EYA1     | MOV10L1    | PAQR9      | DUSP26    | HMCN1    | SHANK2    |
| TXK      | UBXN10    | LTBP2      | SCN4A      | FOXC2      | MIR32    | THEGL    | TOPAZ1     | CRISPLD1   | MMP12     | FAP      | ENO4      |
| KDM5D    | CELA1     | C4orf45    | FAM163B    | RBM44      | CEACAM20 | UPK3B    | SERPINB13  | NCALD      | SLC28A3   | SERPINA9 | HOXD11    |
| LMX1A    | SCRT2     | PGBD5      | CD4        | SASH3      | SIAH3    | C20orf96 | SMIM38     | OR52N1     | NEUROD1   | SLC25A21 | SSPO      |
| VIPR2    | PDIA2     | KCNMB4     | UCHL1      | IQCM       | ATP6V0D2 | RIMS2    | MPP3       | GBX1       | SNORA54   | MIR26A1  | ST18      |
| KCNK10   | DYNLRB2   | RNASE10    | RLN3       | MIRLET7G   | AP3B2    | CAP2     | AXDND1     | RNF150     | IL1RL1    | CCN3     | SMIM41    |
| ANKRD34B | TRPC5     | SFRP5      | VWC2L      | TMEM121B   | NEUROG3  | LANCL3   | GRK1       | PTPRB      | PLD6      | FOLR2    | TRIM22    |
| SLC27A5  | TPO       | TWIST1     | NAGS       | GLYAT      | ONECU2   | LRG1     | HTR2B      | GCHFR      | TOMM20L   | CLIP3    | PAX3      |
| SNORD38B | AMPH      | PTPRB      | P4HA3      | RNU6-1095P | RPL36AL  | TRIM67   | FGA        | INSYN2B    | PTPRO     | L3MBTL4  | COCH      |
| CNTF     | DKK2      | LNP1       | ZNF35      | MASP1      | PCDHGA4  | MYH3     | DPF1       | RF02176    | C4orf51   | PITX1    | TNFRSF13C |
| ZNF385B  | ADCYAP1R1 | LRR36      | NRSN2      | FRMD5      | CRNN     | RNU6-58P | ZNF641     | S1PR1      | TRIM66    | ZFP37    | PCDH9     |
| GPR151   | DPEP3     | ADAMTS4    | PCDHAC2    | ADAMTS12   | ADCY5    | CFAP52   | C3AR1      | CYP1A1     | TRIM9     | C2CD4C   | LMX1A     |
| C20orf96 | NKX6-1    | RAB39B     | TSPAN1     | P2RY4      | LRRN4CL  | C7       | FBXO43     | CDK18      | GLRA4     | SEMA6B   | MFAP4     |
| KCNN4    | FXYD1     | SRMS       | S100Z      | DLL3       | MAPK15   | ELN      | SLC30A10   | ZMAT4      | PDE3A     | SPACA1   | TACR3     |
| EBF1     | ALX1      | TMEM178A   | EDNRB      | MANSC4     | TNFSF13B | PRSS35   | ZFYVE28    | ARHGAP28   | RNU6-102P | ZNF521   | ANKDD1B   |
| RSPO3    | PAK5      | GXYLT2     | PCSK2      | PGR        | LRR10    | ESAM     | MGRPRD     | ADGRD1     | LHFPL2    | FBXO27   | LMLN2     |
| TRIM17   | MRAP      | UPK2       | HLX        | BICD1      | DIO3     | ADGRB3   | BSX        | ANGPTL1    | GF11      | ACTA1    | RPE65     |
| LRRIQ3   | MAEL      | GCK        | PTPN22     | CD83       | TMEM82   | ANGPT2   | CFAP221    | MC5R       | EMID1     | LEPR     | GRIA4     |
| SUN3     | KLHL14    | GPR82      | CA5A       | MCMD2      | FXYD1    | ADCY2    | SYNPR      | CDH8       | PADI3     | EPHA5    | SNORA11   |
| HSD11B2  | HRK       | BOLL       | GDF7       | CXCR6      | LEPR     | ARL13A   | LKAAEAR1   | GNAT2      | ADCYAP1   | ELN      | VEGFC     |

|          |           |          |          |           |            |           |           |            |           |          |           |
|----------|-----------|----------|----------|-----------|------------|-----------|-----------|------------|-----------|----------|-----------|
| AGXT     | TTC6      | TIE1     | PTPRC    | SLC35D3   | NR5A1      | CD300L G  | ZNF536    | FRMD7      | SNAP25    | TRPV5    | CCN4      |
| ZMYND10  | HUS1B     | PLIN5    | GPR141   | CARD11    | BIRC7      | ABCC8     | LRMDA     | RF00432    | COMP      | TIMP4    | TMPRSS15  |
| PTPN5    | HS3ST4    | ITGA9    | SNORD117 | FBXO41    | MUC13      | MIR99B    | ODF3      | FMO2       | C20orf204 | GRPR     | F13B      |
| SCARNA22 | TRIM50    | IL9R     | SLC24A5  | ZFP37     | STPG4      | MYCT1     | LRGUK     | AC022167.5 | GREM2     | PTPRT    | SOHLH2    |
| ALPK3    | VASH2     | DHH      | KRT23    | MEIOB     | TAL1       | SEBOX     | COL6A5    | CCDC106    | KLHDC7B   | ASTN2    | HPCAL4    |
| SSTR2    | LOXHD1    | SOX8     | CIITA    | C1orf115  | ODAM       | WNT1      | DGKB      | ICA1L      | RBFOX1    | ADRA1A   | CHRNA2    |
| LIMS2    | MMP23B    | IQCH     | SIX4     | RADIL     | RASGEF1C   | RADIL     | INSRR     | RBM44      | TMPRSS11E | LRRC4    | WNT1      |
| RCAN2    | TNFRSF9   | GPR18    | SCN10A   | DNAH9     | DPYSL4     | SHANK2    | P2RY12    | CNR2       | SERPINC1  | SLC10A4  | GDF10     |
| KCNB1    | STAB2     | BMX      | WDR17    | PDE6B     | CPLX3      | SLC41A2   | JCHAIN    | GRIK4      | LRRC23    | MRPL53   | GPR37L1   |
| F2RL2    | MKX       | HOXD3    | DRC1     | FCMR      | PPEF1      | C20orf144 | CLEC7A    | OMD        | CLDN10    | PCDHG5   | MIP       |
| GFPT2    | KLHL4     | ASGR1    | TRIM71   | UCMA      | ITGAD      | KDR       | MUC13     | GPR15      | SLC27A5   | CA8      | DISP3     |
| HHATL    | CXCR2     | PARVB    | TULP1    | KRTAP16-1 | SP5        | FUT9      | TACR2     | MS4A7      | ERFE      | CCDC65   | RHPN1     |
| PJKV     | SNORA84   | MDH1B    | LRRN1    | IL17B     | SPAG4      | KRT72     | SRPX2     | TMEM249    | ENKUR     | FGL2     | CDH9      |
| ALPK2    | TRPV2     | TSPAN11  | CCDC85A  | FGF7      | LOXL1      | RNASE6    | LRFN2     | TAGLN3     | OTX1      | MPO      | GJC2      |
| CERKL    | RRH       | CHST4    | RNASE6   | FST       | C2orf92    | SLC8A2    | RNU6-799P | ENPP2      | BCHE      | RTL5     | IL20      |
| ZGLP1    | TMPRSS11F | CLDND2   | PRRX2    | ANK1      | HTRA3      | CREB3L3   | DRD3      | CDH12      | SOX5      | GRM8     | MAP7D2    |
| EFCAB9   | SCAMP4    | NPAS4    | HSD17B1  | CPSF4L    | CORO6      | TMEM255A  | NOX3      | LRRC4C     | FUT7      | SLC47A1  | RASEF     |
| TLR6     | PDE1B     | B3GNT10  | NHLRC4   | CHST13    | CADM2      | GDF10     | POU4F3    | VSX2       | TSPAN10   | KLHL33   | FREM1     |
| DMRTC2   | TRIM15    | GP1BB    | SLC27A5  | GRAMD1B   | CYBB       | PTPRO     | BARHL2    | FMN2       | GATA1     | SLC1A2   | GGT7      |
| ALLC     | KRTAP26-1 | MASP1    | LSAMP    | ACOT11    | KDR        | KCND3     | TLR7      | SCRT2      | TDO2      | MEOX1    | ECEL1     |
| RHAG     | TMEM71    | PTPRO    | MMP24    | SRMS      | ZAN        | NUGGC     | OR11H6    | GCGR       | PPARG     | MECOM    | ADIG      |
| CA5A     | CCDC102A  | XCR1     | SEMA3G   | PGLYRP2   | ST6GALNAC5 | TMEM178A  | SIM2      | TRPC3      | CD93      | TH       | LY6G6D    |
| SPP2     | CPQ       | TRPM3    | TOMM6    | PRR18     | SPNS3      | CHP2      | ANKUB1    | CNTN6      | SAMD15    | TMEM229A | KMO       |
| PTGFR    | SEMA3A    | PDK4     | CCR2     | OTOGL     | SCARNA22   | SPINK4    | GABRA1    | SERPINI2   | PNPLA5    | PCDH15   | ARL13A    |
| TMEM156  | OIT3      | SHISA3   | SMIM35   | CHRM3     | ZP1        | DSCAML1   | SLITRK4   | B3GALT1    | ALOX15    | LRRN1    | STMN3     |
| FXYD2    | GPR85     | MIR628   | CXCR2    | CHIC1     | IL7R       | STMN2     | HECW1     | DNER       | KCNAB1    | BMX      | NPPC      |
| FYB1     | SLAMF9    | PAX7     | LTF      | RNF222    | 4-Sep      | RADX      | ZNF697    | TRHR       | TWIST1    | PSMA8    | ANK2      |
| SNAI1    | TMEM95    | PDLIM3   | KRT20    | GJB1      | ARR3       | EGR4      | SCTR      | HRH3       | HECW2     | SHISA3   | CHRD1     |
| KRT34    | ACKR1     | CA8      | SCG5     | STK32A    | CLDND2     | PHACTR1   | SLC6A16   | MIR154     | ATP6V0D2  | CRISP2   | RNU6-799P |
| MGAT4C   | CSMD3     | GREM1    | DYNLRB2  | ACTL9     | TTC6       | HIST1H1A  | KCNJ8     | SLITRK1    | CD101     | LRRC34   | KRTAP7-1  |
| NT5C1B   | STMN4     | LMO2     | NKX6-1   | DISP2     | POU2F2     | NCMAP     | ITIH1     | SLC8A3     | LRRC52    | RNF182   | PSORS1C2  |
| MASP2    | LRP1B     | CD300L G | MYOZ1    | COL26A1   | SDS        | ZNF423    | SMCO3     | TEX51      | CTSE      | HEPACAM  | SNORD59A  |

|               |             |              |               |               |              |                |               |               |               |                |               |
|---------------|-------------|--------------|---------------|---------------|--------------|----------------|---------------|---------------|---------------|----------------|---------------|
| LY6H          | MIR26<br>A1 | PRR19        | SRPX2         | SERPIN<br>A2  | IL20         | GBX1           | RNU6-<br>351P | DMGDH         | PRKCG         | C9             | MYBPH         |
| TMEM11<br>4   | SPOCK1      | CCDC30       | SAP25         | PITX3         | LRCH2        | LAIR1          | SCARNA<br>3   | CSF2          | SYNGR<br>3    | KCNE4          | C8A           |
| TMEM52        | HSBP1L<br>1 | HCAR1        | ASB10         | BPIFB1        | SNORD<br>42B | SLC27A<br>2    | RIMKLA        | KCNJ8         | LRRC10<br>B   | C13orf4<br>6   | TAS1R2        |
| SPDEF         | GPR15       | PNMA8<br>C   | SH3GL3        | EDN3          | PAX3         | SNPH           | RNF186        | MYH8          | GPR82         | FATE1          | CPNE9         |
| SIT1          | NRXN3       | GNG2         | FOXA2         | GUCY2F        | C17orf9<br>8 | INSYN2<br>B    | TMCO2         | CNGA3         | ATP13A<br>4   | SH2D6          | LIMS2         |
| TAS1R2        | SGIP1       | SERPIN<br>D1 | DAO           | ST8SIA3       | C1QL3        | SHOC1          | SP6           | CACNA1H       | PSPN          | NXPE4          | IQSEC3        |
| TRPM8         | ST8SIA<br>2 | PPP1R1<br>6B | C14orf18<br>0 | TMEM2<br>11   | TNFSF8       | HSD11B<br>1    | DLGAP3        | GRM5          | CD79A         | SNORA<br>62    | COL28A<br>1   |
| RIMKLB        | CTNNA<br>2  | CCK          | SAMD7         | FAM43<br>B    | LTC4S        | PRUNE2         | LRRC26        | PRRX1         | SYT13         | RNY3           | SGCA          |
| PNMA3         | SRRM5       | FMO2         | LRRC43        | SNORD<br>127  | CYP21A<br>2  | KCNH4          | PTPN18        | KLHL31        | SNORD<br>87   | KLKB1          | HIST1H<br>2BM |
| SFMBT2        | CFD         | SLC5A1<br>1  | SNORA2<br>B   | TNP2          | ANKS1B       | DPP6           | GSG1L         | KCNA2         | IFNK          | PRRX2          | CAMP          |
| XKR9          | HYAL4       | ITPRID1      | SLC22A1<br>4  | CAMP          | PKP2         | TIE1           | IQCD          | RIMS2         | GAREM<br>2    | HOXB1          | ELOVL3        |
| MYOZ1         | FRMPD<br>4  | IL7R         | C5AR2         | MOGAT<br>1    | GJC2         | GIMAP7         | ABCA9         | KCNH1         | TRPM2         | TMEM1<br>56    | PANX3         |
| PCDHA10       | SLITRK3     | PCDHG<br>A2  | RNU6-<br>871P | SEC14L<br>5   | CSMD2        | MYH7           | OBSCN         | ADCY8         | CAMK2<br>A    | ICAM2          | PLA2G2<br>E   |
| CNGA4         | XIRP2       | QRFP         | OVOL3         | CERKL         | SNORD<br>63B | ACTL9          | KCNN2         | RBM24         | SNORD<br>38B  | ABCC2          | SLC12A<br>1   |
| CAMP          | OSR2        | LRG1         | GPR50         | SSMEM<br>1    | KCNQ3        | RHO            | GPR75         | SPRED3        | SLC9A4        | LMOD2          | NPPB          |
| ADGB          | GRIK2       | PIK3AP<br>1  | CHN1          | CRHR1         | PDGFRL       | C9orf43        | LYVE1         | C5orf49       | FRRS1L        | DYSF           | PLPPR5        |
| RF02132       | DNER        | SORBS2       | PHYHIPL       | F2RL2         | SYT14        | ZMAT4          | CKM           | KRT18         | GAPT          | TMEM1<br>78A   | ALKAL2        |
| ERG           | LHX6        | MIR99B       | HRH1          | MAGEE<br>2    | C9orf13<br>1 | PIK3R5         | FMNL1         | FAM205C       | VTCN1         | RF0168<br>4    | TBX5          |
| FAM237B       | JCHAIN      | SMYD1        | PTGER1        | PHEX          | GRIA1        | TIGD4          | RBM44         | SORCS3        | APOD          | KIF26B         | SCGN          |
| NLRC4         | MMP2<br>5   | PPP1R1<br>B  | ITIH3         | SMIM3<br>8    | EFCAB1<br>3  | CAMK4          | LRRN4CL       | UROC1         | SUN3          | S100A8         | GNB3          |
| MYO1F         | ALDH1<br>A2 | PRM2         | FAM205<br>C   | ADAMT<br>SL3  | PNMA8<br>C   | TUBB4A         | SNX32         | WDFY4         | ZNF575        | CHSY3          | OTC           |
| ADAMTS<br>3   | HKDC1       | TTBK1        | RAB39A        | ACOT12        | MYT1L        | AC0206<br>13.1 | ATP2B2        | TP53TG5       | SLC9B1        | STK33          | NEURO<br>D2   |
| FIBIN         | HMX1        | SNAI1        | MPO           | F2RL3         | SCN3B        | BCHE           | EPHA10        | GFRA3         | MIR628        | APOA2          | SCN2A         |
| P2RY13        | SHH         | SLC16A<br>12 | KCNJ9         | PLA2G3        | MROH5        | KLB            | PLA2G5        | NACAD         | CCDC69        | THRSP          | SIT1          |
| SLC5A11       | ATP1A4      | ALDH1A<br>2  | C5orf52       | EYA2          | KRT20        | MC5R           | HIST1H2<br>AE | HIST2H4A      | C2orf72       | EFHD1          | CRNN          |
| PRKCG         | NR2E1       | GREM2        | TFR2          | ZC3H12<br>D   | TMEM2<br>10  | ZNF853         | ARMC12        | GRIA2         | C2orf73       | TSSK3          | GPM6A         |
| TRIM71        | HTR7        | GTF2A1<br>L  | FBXO41        | GRIN3A        | DCDC2C       | FMO2           | RAB42         | STRA6         | ANKRD<br>34A  | SLAIN1         | ZDHC<br>22    |
| SYT5          | TKTL2       | SLC2A1<br>0  | MEIG1         | ASPHD1        | TLX1         | AC0221<br>67.5 | PDE10A        | SLC43A3       | TMEM3<br>7    | ATOH8          | RFLNA         |
| CCDC148       | CACNA<br>1S | SLC5A2       | HECW2         | TARM1         | HIST1H<br>1T | GNG4           | SIAH3         | TMPRSS1<br>1A | SSTR3         | EGFLA<br>M     | GPR22         |
| SUSD3         | SYT6        | TRAM1<br>L1  | UBD           | DEUP1         | KCNK9        | CLCN1          | CHRNA5        | NLGN1         | C14orf1<br>32 | HSBP1L<br>1    | DCLK2         |
| SNORD12<br>1B | SLC7A9      | TXNDC2       | KCNG2         | RNU6-<br>638P | LKAAEA<br>R1 | ERBB4          | CFAP97D<br>1  | DMTN          | ZNF449        | ST6GAL<br>NAC4 | AVPR2         |
| GPER1         | CNTNA<br>P4 | ANKRD<br>63  | SLC19A3       | FHAD1         | KLF17        | RF0002<br>6    | PLEKHG4       | KCTD16        | SVIP          | HKDC1          | ABCC9         |
| SEMA4F        | TRPA1       | NPPB         | C2orf74       | RHPN1         | SFTA2        | ZNF831         | RPS12         | BFSP2         | KCNG1         | SSTR1          | NPPA          |

|              |              |                |                 |              |               |               |              |              |                |               |               |
|--------------|--------------|----------------|-----------------|--------------|---------------|---------------|--------------|--------------|----------------|---------------|---------------|
| SYNDIG1L     | RTP1         | ABCG5          | ADAP2           | ZFP82        | ATP6V1<br>FNB | CLEC1A        | C8orf74      | NXPH1        | HPX            | KCNE2         | RAG1          |
| EPS8L3       | ANKAR        | GJC2           | DSCAM           | PRELID3<br>A | GPRC5A        | AGTR2         | TMEM16<br>9  | PTGER2       | ELOVL2         | RGS14         | PRELID3<br>A  |
| SCN3B        | BAAT         | CABP7          | NMU             | CHAD         | LRGUK         | OMD           | TDRP         | NOX4         | SEC14L<br>5    | HUS1B         | ZNF541        |
| CIDEC        | PPP1R3<br>A  | NDP            | ARHGAP<br>36    | CASR         | FAP           | KCNN4         | TRPV5        | P2RY4        | DNAH5          | SLC19A<br>3   | LDB3          |
| FAM229A      | OR4C5        | ANGPTL<br>3    | CSF3            | CD101        | ARFGEF<br>3   | MAP6D<br>1    | TTBK1        | CITED1       | PTGFR          | DMC1          | RIMS2         |
| CD34         | MAB21<br>L2  | KCNE5          | PCDH8           | APOBEC<br>1  | PLP1          | TMEM2<br>6    | EPHA7        | HVCN1        | CAPN9          | SOX18         | FAM20<br>A    |
| CALCB        | SYNDIG<br>1  | EPS8L3         | CALY            | TSPAN1<br>0  | KCNG4         | SLC6A3        | SNORD6<br>3B | NRXN1        | ARMH1          | FAM22<br>2A   | TRIM69        |
| SLC9A7       | PCP4         | SSMEM<br>1     | C11orf53        | CFAP10<br>0  | SPACA4        | DNAI2         | RGS5         | SMIM38       | FYB1           | PCSK5         | TIFAB         |
| RARRES2      | PHF21B       | LEPR           | SIDT1           | PRKCG        | CHRD          | LYL1          | DZANK1       | POU3F2       | GLIPR2         | RNU6-<br>200P | MOAP1         |
| ADAP2        | HGF          | PDGFRB         | NECAB2          | HSD17B<br>1  | ERG           | TREH          | PROM1        | CES5A        | CCDC16<br>9    | WDR72         | ABCC8         |
| SHE          | COL9A2       | TSHB           | ABCA9           | RAI2         | ZBTB46        | AKAP6         | ATG9B        | MOS          | HMX1           | FMO4          | COLEC1<br>2   |
| RBM42        | ASCL3        | NTN5           | SHROOM1         | MTUS2        | ALS2CR<br>12  | SH3BGR        | CCR7         | ANKDD1B      | SNORD<br>18A   | PCDH10        | RANGR<br>F    |
| APLNR        | C9orf24      | KCNA3          | ASIP            | DPYSL3       | APOB          | HTR6          | TRIM50       | KCNE5        | CERKL          | UBTFL1        | CACNA<br>2D1  |
| FABP7        | DIO1         | PLK5           | CCDC83          | PLA2G2<br>E  | PSORS1<br>C2  | EID2          | C8B          | CASS4        | FAM78<br>A     | PREX2         | PRDM6         |
| SCARNA5      | SPACA9       | TNFRSF<br>1B   | CHRN3           | AFF2         | RTN1          | B3GALT<br>1   | TC2N         | TMEM44       | RNU10<br>5C    | LRRC55        | SORCS1        |
| GASK1A       | GLIPR2       | PTCH2          | CDHR4           | NFATC4       | SLC36A<br>2   | HRH3          | SCN11A       | KCNT1        | C1QL3          | INSC          | TMEM1<br>45   |
| GLIPR1       | RNF183       | ACTA1          | IL25            | SRGN         | PROM1         | DMGDH         | LTA          | SIX4         | ABCA9          | HIF3A         | DMGDH         |
| INSYN2B      | SCN2B        | WDR93          | SLC24A4         | CNDP1        | ANO4          | GRM5          | ODF3L1       | CYTL1        | C10orf9<br>9   | DTX1          | TMC1          |
| ADCYAP1      | ERC2         | MIR708         | NKX2-6          | RTN4RL<br>2  | MIR339        | MYH8          | CRYGN        | CCL7         | HRH1           | PCDHB6        | OR13J1        |
| LAMC3        | SNX22        | MROH5          | WDR72           | CD3E         | TOMM<br>6     | ADCY8         | GFI1B        | RGS7BP       | GPRC5<br>A     | NFATC4        | LBX1          |
| TMEM18<br>2  | ZYG11A       | AGXT2          | ALKAL2          | KLF14        | VAX2          | ATP7B         | CLEC4E       | PRKG1        | SCARN<br>A12   | SCNN1B        | KCNA4         |
| GPR179       | RNF207       | CCDC60         | RF00026         | GPRC5B       | MAT1A         | CXCL11        | SLC25A2      | ALDOB        | TRIM15         | TACR1         | C2orf16       |
| ABCA8        | PCDHB<br>3   | TC2N           | MIR33A          | DNAH1<br>0   | C8A           | FAM20<br>5C   | RPL10L       | LSAMP        | SNORD<br>71    | CALHM<br>6    | NEURO<br>D6   |
| MMP12        | SEMA7<br>A   | FTCD           | OR51E1          | MINAR<br>2   | INSM2         | KIAA15<br>49L | SKAP1        | WDR93        | KRT28          | LRRC75<br>B   | DCSTA<br>MP   |
| INMT         | TNFSF1<br>2  | TENM1          | TRIM40          | SNRPN        | CHRNA<br>4    | FRMPD<br>3    | CPA2         | EMILIN2      | ARFGEF<br>3    | MYOC          | GBX2          |
| CALB2        | AKAP14       | GCNT7          | RNU6AT<br>AC29P | MYRF         | SAMSN<br>1    | ZNF366        | PLCE1        | SLC41A2      | RNU6-<br>1122P | POU2F2        | PIWIL4        |
| CR2          | CKM          | PRKD1          | SNORD1<br>23    | SNORD<br>87  | P2RY6         | PGF           | SPN          | MYO15A       | SHH            | IL4           | KCNJ4         |
| TMEM13<br>2D | EPHA6        | STC2           | SNORD9<br>2     | SEBOX        | PKLR          | NXNL1         | TNFSF13<br>B | ZNF618       | EID3           | INA           | GPR6          |
| ZNF483       | RAB17        | SGPP2          | CLCA1           | TSGA10<br>IP | HNF4G         | CCDC15<br>1   | KCNT1        | LMCD1        | LCN2           | SEMA5<br>B    | KCNV2         |
| CORO2B       | TMEM2<br>55B | ACO221<br>67.5 | RHOH            | GSG1         | FMO3          | GULP1         | MYH15        | OR10V1       | SLURP1         | MFRP          | RTP2          |
| MAPK10       | CNGB1        | LRAT           | INSM2           | TRIM46       | RNU1-<br>125P | GALNT1<br>2   | B3GNT1<br>0  | MMP13        | GUCA1<br>B     | RNU6-<br>243P | PLPPR1        |
| LYG2         | CLCN1        | PAQR6          | BARHL1          | SMARC<br>A1  | RFLNA         | PCDHB7        | NR5A1        | POU6F2       | PDE1A          | SLC22A<br>2   | RNU6-<br>539P |
| ABAT         | ECEL1        | GPR21          | TRPV5           | FANK1        | TACR3         | CASR          | ESRRG        | SNORA58<br>B | BATF           | PRSS38        | RNU6-<br>10P  |

|           |          |           |          |           |            |           |          |          |          |         |          |
|-----------|----------|-----------|----------|-----------|------------|-----------|----------|----------|----------|---------|----------|
| GAB3      | GAD1     | RBM42     | PPP1R9A  | MGAM      | TTR        | SAPCD1    | HSH2D    | CADM3    | SGPP2    | SYNC    | PLEKHB1  |
| PRKD1     | RETN     | PLA2G2E   | NAP1L5   | ALAS2     | FOXF1      | RASEF     | SLC6A18  | IL4I1    | TLL1     | PTPRQ   | SHOC1    |
| CHST11    | DPF3     | ABCC8     | KRTAP8-1 | SGCG      | HGD        | OMG       | PLA1A    | ZFH4     | CRB1     | MLANA   | FAT3     |
| TSTD1     | ZNF583   | HELT      | SCIMP    | PAPPA     | PPP1R16B   | ZP1       | FAM189A1 | EID2     | GMFG     | FGF22   | FBXL7    |
| ZNF354B   | IL7R     | MORN3     | SLC36A2  | WNT9A     | CD53       | NGB       | RESP18   | RYR3     | ZBP2     | GUCA2B  | AK9      |
| IQCD      | SPAG8    | FAM171B   | EPHA10   | NAALAD2   | CNIH3      | PTCH2     | AKAP2    | SLC9A3   | TIMP1    | ADRA2A  | THEMIS   |
| OMP       | PLK5     | GCNT1     | ST8SIA1  | ROPN1L    | PTPRO      | GDF9      | SLC35F3  | GPR55    | FAM71B   | KCNH7   | GPR85    |
| SYT9      | BRINP3   | MBOAT2    | CACNG1   | NRXN2     | IGHM       | SPATA46   | MIR711   | GUCA2B   | NEK11    | FSD2    | MPP4     |
| TMEM217   | PREX2    | MPPED2    | MYO1F    | FAM13A    | ARMC3      | CD19      | ERP27    | C1RL     | SUSD3    | SLC43A3 | MYH3     |
| CHRNA9    | PRF1     | LMAN1L    | ZNF583   | RFTN1     | SOX17      | HBZ       | OPN5     | PRELP    | PLAUR    | ZHX1    | CX3CR1   |
| LYPD2     | F2RL3    | ARG2      | GYPC     | APOBEC3H  | SHISA7     | GNG8      | KLHL33   | MYO1G    | CFAP52   | APOLD1  | ZPLD1    |
| ERICH4    | GLRA4    | RBFOX1    | CA14     | CACNA2D4  | CNTF       | GIMAP8    | CXCR3    | ARNT2    | UNC5D    | SLC38A4 | SCN9A    |
| NTS       | C8orf74  | MB        | BFSP2    | RNU6-494P | RNU6-1299P | ASXL3     | GOS2     | FAT3     | IGSF11   | CGREF1  | C16orf45 |
| ZSCAN10   | SSPO     | ZFP82     | ATP6V0D2 | CD27      | HOXB1      | IL18RAP   | HCRTR2   | DGKB     | FAM166A  | MT3     | CAPZA1   |
| BATF3     | CSMD2    | CD34      | KLRD1    | KCNC2     | TMOD1      | CLIP3     | IL12RB1  | GABRA2   | OR6S1    | NTRK3   | TMIGD1   |
| TKTL1     | CYTIP    | SHANK2    | CRABP1   | BTC       | FLG2       | GFPT2     | AQP4     | PAX9     | STOX1    | AEBP1   | KCNQ3    |
| NRL       | KCNQ3    | GPR85     | PRF1     | JAM2      | ZBP2       | RNU6-384P | TBX19    | SLC22A16 | TM4SF19  | CD4     | RGS7BP   |
| SPEM1     | SPATA45  | CRACR2A   | ATP1B2   | COMP      | OR10V1     | TEX38     | LRP2     | FGF12    | ADAM32   | CRTAM   | TYRP1    |
| PXT1      | IL4I1    | GPR22     | PIK3R6   | MCOLN3    | KCNK13     | SNORA23   | FKBP6    | PDE10A   | CD244    | SYT7    | ANKS1B   |
| PNOC      | RNASE12  | ST18      | CPQ      | CLGN      | C16orf54   | ADAP2     | LHX6     | CHRNA9   | SLC9A7   | CKM     | CPN1     |
| USP29     | SRSF12   | C14orf132 | DNAH3    | ACVR1C    | TMEM255A   | PRDM13    | PROKR2   | ADRA1D   | CFAP73   | ALDH3B1 | PLCE1    |
| AURKC     | RF00604  | KCND3     | BATF2    | TLR6      | SERPINA5   | AK9       | ANGPTL3  | COL11A1  | C1QB     | CTNNA2  | SCARNA1  |
| RF00090   | EID2     | NXNL1     | BTK      | TMEM236   | CCDC69     | CCN3      | ELAVL4   | CHRNA9   | SNORD117 | CXCR2   | CYP2F1   |
| KRTAP27-1 | MIR103A2 | NEGR1     | TRDC     | BATF      | REC8       | CYP7B1    | TRIM40   | FGF5     | IL17B    | CACNG3  | FLG      |
| HOXB13    | ACMSD    | DKK2      | PHEX     | NPFFR2    | GUCY2C     | CCDC168   | PDCL2    | KCNJ5    | SEZ6     | SLC2A10 | PCDHB1   |
| RUNX1T1   | ZNF536   | MYL10     | SERP2    | CYB5R2    | ILDR2      | LEF1      | S100G    | SLC17A2  | GLIPR1   | CR2     | RN7SKP56 |
| C15orf48  | ATP13A4  | CFAP61    | SYTL5    | RSPO2     | CXXC4      | CHSY3     | C9orf131 | ADH4     | MAPK10   | PIPOX   | IL1RL1   |
| LRGUK     | BARHL1   | F5        | RTN1     | OR1M1     | EPHA10     | FUT4      | RNF222   | GLRA3    | TEPP     | ITIH4   | AURKC    |
| SEMA3G    | NKX2-1   | RBPM52    | GPR15    | CSTL1     | C21orf58   | PEAR1     | CLDN10   | TAS2R16  | SMC1B    | CNMD    | TOMM20L  |
| FOXF1     | USH1G    | SEZ6      | PTP4A1   | FCRL1     | MIR221     | ST3GAL5   | PAX6     | PRLHR    | PGLYRP1  | ABCC12  | PTCRA    |
| SLA       | PRDM13   | TACR2     | AK9      | C17orf107 | KCNB1      | UBE2QL1   | SKOR1    | GJA10    | LOXL2    | KIRREL2 | SLC8A2   |
| TMEM26    | GALNT17  | CHGB      | ABCB4    | CER1      | CEL        | TMEM232   | FSTL4    | CA10     | AMH      | FAM167B | TSSK1B   |
| BTK       | TMEM82   | IGSF23    | TNFSF8   | C3orf52   | CACNG2     | OR10V1    | SLC13A3  | CCDC192  | MIR365A  | SLC11A1 | ASB5     |



|          |             |               |               |               |               |             |              |          |                |               |               |
|----------|-------------|---------------|---------------|---------------|---------------|-------------|--------------|----------|----------------|---------------|---------------|
| FAM184A  | DISP2       | FAM16<br>6B   | CNKSR2        | HAS1          | FNDC8         | MFNG        | DDX4         | RPL10L   | SLC5A1         | CXXC4         | LMO2          |
| ARID3C   | TNMD        | NME9          | ESRRB         | C14orf1<br>32 | MYPN          | DDX25       | CCDC33       | LAYN     | ADAM1<br>1     | TNR           | UCP3          |
| RASSF2   | FANK1       | OTOP2         | KRTAP15<br>-1 | RINL          | GRID2         | RNF144<br>A | SLC12A8      | LIN28B   | OVOL3          | ADAM2<br>8    | NLGN1         |
| PLEK     | MEP1B       | MAS1          | PSCA          | WASF1         | MYCT1         | KLK14       | PCSK1        | RF02209  | TNFRSF<br>8    | RUNX1T<br>1   | PAX6          |
| PCDHGA2  | RPE65       | SCARN<br>A18  | RNU1-<br>43P  | SPATA2<br>0   | RIBC2         | FSD2        | SNORA5<br>5  | FAM81B   | TAL2           | FAXDC2        | HECW1         |
| RGS4     | IQSEC3      | RF0001<br>9   | C1QC          | SPOCK1        | STK32B        | MIR26A<br>2 | ANKDD1<br>B  | ZPLD1    | ODF3L1         | NELL2         | SIX3          |
| SCN3A    | NXNL2       | DTHD1         | SNORA5<br>4   | SCAMP<br>4    | LIN28B        | SLC9A3      | ALPK2        | PCDHB1   | SHCBP1<br>L    | S1PR1         | PTCHD4        |
| CYP21A2  | NR5A1       | PATE3         | XIRP2         | ASPA          | PTCHD4        | GPR55       | IL1RAPL1     | CBLN2    | SEMA7<br>A     | PPP1R3<br>A   | TTC9B         |
| CLDN20   | HTR1F       | NSMCE<br>3    | OSR2          | P2RY13        | TMC1          | WDR86       | MIR133A<br>1 | KCNC2    | EGR4           | SOAT2         | SEL1L3        |
| TOX      | TMEM2<br>10 | C6orf20<br>1  | SHH           | SLC29A<br>4   | HS3ST5        | GUCA2<br>B  | SLC1A7       | P2RY12   | SAMSN<br>1     | SLAMF7        | FGF           |
| ANKRD31  | FAM71<br>B  | KIAA16<br>14  | CR2           | PLD6          | OTX2          | SLC39A<br>4 | CCDC146      | ITGA9    | CDH17          | C3orf67       | CDHR3         |
| NANP     | CFAP61      | TMPRSS<br>11A | HLA-DRA       | FGL2          | MYL1          | SAT2        | BHMT2        | TRPC5    | CNTN5          | PPP1R4<br>2   | ADAMT<br>S18  |
| LTC4S    | SRPX2       | ST3GAL<br>5   | LMOD1         | ACSM5         | KCNJ6         | ADGRB<br>1  | VGLL1        | SSTR2    | SCARN<br>A3    | TFPI2         | HTR6          |
| AJAP1    | TSHR        | RIMS1         | CHRNA4        | PTGER2        | BRINP2        | RCN3        | TBXA2R       | IL1RAPL2 | GUCY2<br>D     | RNU6-<br>895P | NAV3          |
| GCNT1    | CDX2        | SCNN1B        | C17orf10<br>7 | SBK2          | LIN7A         | ACCSL       | RF00622      | GABRA1   | CCKBR          | PLD6          | MISP3         |
| CD300LG  | C8orf34     | DDX60         | SAMSN1        | DACH1         | C14orf3<br>9  | ETV2        | L1TD1        | GRIK1    | PLA2G2<br>D    | CLHC1         | RBM46         |
| SLC6A16  | PTCHD<br>4  | ATP2A3        | OTX2          | LRRD1         | HCN1          | DLL3        | SNORD1<br>7  | ST8SIA2  | IQCD           | PTPRO         | DBN1          |
| SNORA62  | SHOX2       | TTL6          | ODF3          | BCAS1         | GRK1          | DUSP2       | EFR3B        | GIMAP1   | CCDC17<br>0    | CLEC14<br>A   | PADI3         |
| IL18R1   | SLC4A1      | KNDC1         | LMOD3         | GPR4          | CHRNA<br>5    | STK32B      | ABCG8        | SEMA4F   | RS1            | GPER1         | C11orf8<br>7  |
| MMP11    | ZC2HC1<br>B | PATL2         | ACOD1         | PRR5L         | ZIC4          | MIR302<br>D | SDR9C7       | HDAC9    | TBX21          | VWF           | SNAP25        |
| CD163    | KLHL1       | KCNA6         | SHISA9        | GJC3          | ABRA          | MANSC<br>4  | BTBD18       | ST18     | OSCAR          | C4orf51       | FGF6          |
| S100G    | FGF8        | CCDC17<br>0   | C6orf118      | C12orf7<br>1  | OR52L1        | PAX9        | TRANK1       | CLCN1    | HCK            | SPACA3        | VSIG10L<br>2  |
| LNP1     | TAC3        | TMEM1<br>19   | RIMBP2        | FSCN3         | EDDM1<br>3    | GLRA3       | GPR17        | GUCY1A2  | VWA5B<br>2     | CA14          | C20orf2<br>04 |
| CFAP46   | CHRND       | PIP           | LHX5          | ARHGEF<br>38  | ADGRG<br>5    | SLC51A      | STK32C       | KCNN3    | LEF1           | SPRY4         | RF0043<br>2   |
| RASAL3   | SLC4A1<br>0 | ODF1          | F9            | TRPC50<br>S   | RNU6-<br>271P | GRIK1       | DENND3       | C16orf86 | REP15          | ITGB1B<br>P2  | SPO11         |
| ATP8B3   | CLSTN2      | MEI1          | ANXA10        | 10-Mar        | SRD5A2        | ELF5        | GAREM2       | CNTN4    | STAC           | KIF1A         | FRMD3         |
| PDE7B    | HDX         | RN7SKP<br>122 | UGT2A3        | ARHGA<br>P20  | GPR25         | ELFN1       | MAMDC<br>2   | BOLL     | PLPP4          | GLRA4         | RBFOX1        |
| PYY      | GSX2        | C10orf1<br>05 | DCDC2         | KCP           | SCUBE1        | RAB39A      | ADAMTS<br>L2 | MEGF10   | POUSF<br>2     | 1-Mar         | TMPRSS<br>11E |
| SLC25A18 | HLA-<br>DRA | STPG3         | BHLHE23       | BMPR1<br>B    | ENPP4         | NDNF        | SEMA6D       | LRGUK    | NYX            | SEMA3<br>A    | PODNL<br>1    |
| TCERG1L  | AVP         | KCNQ2         | ONECUT<br>3   | DNAH1<br>1    | P2RY10        | SLC12A<br>1 | AANAT        | NDNF     | TMEM1<br>21    | ACSM3         | SERPIN<br>C1  |
| CPNE7    | IQCA1L      | SLC34A<br>3   | RNU2-<br>35P  | SUSD2         | LINGO4        | HAND1       | ACOX2        | C9orf131 | ERN2           | RNU6-<br>102P | SHC3          |
| CHST10   | ELFN2       | TMC3          | NKAIN2        | NEIL2         | KLHL41        | SPINK8      | GUCY2C       | ZNF423   | AL1625<br>96.1 | SULF1         | TESPA1        |

|           |            |            |            |          |           |          |          |            |            |         |         |
|-----------|------------|------------|------------|----------|-----------|----------|----------|------------|------------|---------|---------|
| GXYLT2    | SPTSSB     | TBX21      | TRBV28     | HCN4     | FAM13C    | SLC36A2  | ASB18    | CSDC2      | PLA2G3     | LHFPL2  | CDHR1   |
| DPP6      | OR56A4     | HSD11B1    | RNU6-750P  | PGF      | SCARF1    | GCSAM    | CYBA     | GPR75      | LAIR1      | GFI1    | CBLN2   |
| ST8SIA4   | TMEM174    | NKG7       | RF00402    | TLE2     | LEP       | NXPE4    | NELL2    | BHLHA15    | RNU6-1299P | EMID1   | DNAH6   |
| RNU4-89P  | FAM19A1    | CTHRC1     | CDK5R2     | CAPN6    | CREG2     | COL15A1  | CCDC60   | MINAR1     | HIST1H1A   | RNF207  | ABCD2   |
| ADGRG7    | CEND1      | SEMA3A     | RERGL      | DNM3     | KRT4      | MLIP     | ACP7     | PTGDR2     | RELT       | IL36B   | RF00026 |
| DZANK1    | MIR200B    | TSSK2      | RNU6-1124P | RF02132  | HAPLN4    | ZFP92    | APOBR    | GPR156     | LIN7A      | FFAR2   | PAPPA2  |
| C1QA      | PSMB11     | IL31RA     | MIR200A    | LAMA1    | IGF2BP1   | MYH1     | LENEP    | BRINP1     | ABRA       | QRFP    | RBP4    |
| TTC21A    | OR5AR1     | TRAT1      | HOXD1      | CDH9     | ERFE      | CARD11   | PCDHA10  | MIR339     | NANP       | TNNC2   | MCOLN3  |
| CCN6      | RNU6-782P  | RGS4       | SRSF12     | LTBP2    | SLC6A19   | RUNX1T1  | GRM8     | TMEM262    | SNORD11B   | UNC5C   | BCHE    |
| TUBAL3    | CFAP99     | SFRP2      | HIST1H4E   | HSD17B13 | GRP       | KCNE2    | PRSS27   | TRPM5      | TNFSF9     | HYDIN   | TMEM117 |
| RAB26     | PLPPR4     | CPNE7      | ACTN3      | MINAR1   | DDAH1     | TMEM236  | KCNAB1   | ATP7B      | LRMP       | MED12L  | PSTPIP1 |
| F13A1     | NMU        | HECTD2     | ARFGEF3    | CFAP46   | PCDHGA3   | TSPAN1   | OR12D3   | CCBE1      | NOX1       | SLC27A5 | PRODH2  |
| B4GALT5   | STRC       | OTOS       | SERPINC1   | CCDC78   | NDST4     | SLC45A2  | TRIM36   | OTOGL      | ZNF366     | ENKUR   | TNNI3K  |
| MYBPC3    | SLC11A1    | BATF3      | IKZF1      | SRGAP1   | SMPD3     | CMKLR1   | GFRA2    | TOX        | SPAAR      | PIEZO2  | GYPC    |
| DTX1      | CHRM4      | FOXO2      | TEKT1      | IL31RA   | HIST1H2BG | RRH      | P2RY4    | SLC12A3    | SRPK3      | GMNC    | FAM184A |
| SNORD94   | PKIB       | DYRK4      | NTN1       | COL8A1   | CLEC14A   | BTBD16   | SLC9A4   | GPR21      | HCN1       | PADI2   | SNX20   |
| GALNT15   | ZEB2       | MYH7       | CCDC184    | SYNPO2L  | TDRP      | LRCOL1   | PCNX2    | CCDC60     | FGL1       | KLHL41  | ASIC3   |
| MIR423    | IRF8       | SGIP1      | NRN1L      | SYT7     | ADAMTS7   | SRSF12   | ADAMTS20 | B3GNT7     | SPINK4     | COL5A1  | PPARG   |
| BIRC7     | CCDC27     | PHACTR1    | CACNA1B    | CDH23    | DEPP1     | MYBPH    | CDH15    | SNORA27    | CLSTN2     | ZNF582  | OLAH    |
| SMCO3     | RNU12      | ZAN        | DLGAP3     | F13A1    | GKN1      | CRABP1   | HIST1H4B | ROR2       | CFAP99     | C1orf54 | KRT18   |
| SCRT1     | FGL1       | AL162596.1 | KLHL40     | NTM      | TMEM229B  | IL17B    | CHRM5    | SLAMF8     | ASB4       | CADM2   | PNPLA5  |
| RCVRN     | ATG9B      | TYROBP     | FGF        | AGXT     | TC2N      | BATF     | SAMD11   | ADIPOQ     | BVES       | GDAP1L1 | SEMA3B  |
| CHGA      | MORN3      | LRRC8C     | ACP4       | C16orf86 | HTR7      | ROR2     | HSD17B2  | SPP1       | SLC25A18   | TAGLN   | ALOX15  |
| LOX       | CCL5       | MCMD C2    | MC1R       | MMP8     | XK        | STPG3    | PCOLCE2  | CRYGA      | NR1I3      | KLF14   | CCDC88B |
| TEX43     | CXCR5      | GLRA4      | TAS1R1     | MPO      | RAP1GAP2  | PADI2    | SPDYA    | TMEM72     | EN1        | GPSM3   | LRFN5   |
| SCT       | SRARP      | PTPRN      | DNAI1      | PPP1R1B  | DNAI1     | SLC10A1  | WIPF1    | SNORA74C-1 | RF00212    | NACAD   | HECW2   |
| ANKRD34C  | CLDN5      | CRHR1      | TMEM74B    | SYNDIG1L | FAM83E    | ANK1     | RBM46    | LHX6       | KLRK1      | LTBP1   | CXCR3   |
| KRTAP24-1 | RNU6-1044P | INSYN1     | CYBRD1     | GALNT17  | SERP2     | SNORD66  | SERPINC1 | TMEM169    | SLC10A6    | CD93    | ACSM4   |
| TMEM235   | BMPER      | ACSM1      | SPNS3      | AMPH     | FAM180A   | STARD6   | TNNC1    | FGF17      | SLC26A9    | SAMD15  | A1CF    |
| RNU1-75P  | NCF4       | VIT        | SLC28A3    | GPR62    | CABCO CO1 | TRPC6    | TESPA1   | TMEM132B   | CHRM4      | OPCML   | PALM2   |
| KCNMB3    | NR1H4      | KLHL29     | JPH3       | ZNF804B  | STKLD1    | PDGFD    | PADI3    | TCF24      | ADAMTS12   | PARVB   | PNMA5   |
| ZNF382    | MOS        | KRT8       | SEMA6B     | STOX1    | SGSM1     | TMEM132B | HRCT1    | SCARA5     | DZANK1     | KLHL29  | ONECUT2 |

|                |               |              |              |              |               |              |             |              |               |              |                |
|----------------|---------------|--------------|--------------|--------------|---------------|--------------|-------------|--------------|---------------|--------------|----------------|
| CASQ1          | PRR19         | MPZ          | PRR5         | MIR133<br>A1 | RNF157        | TCF24        | FLT4        | ABAT         | GAP43         | KYNU         | LRRC10<br>B    |
| SNORD89        | RNU4-<br>58P  | ITM2A        | KCNK16       | TMEM1<br>63  | RGS8          | SCARA5       | KLHL13      | AK7          | C11orf9<br>1  | TBXA2R       | RAB37          |
| PCDHB2         | PHOX2<br>A    | C1orf16<br>2 | HOXA13       | IL16         | ZNF354<br>B   | CRMP1        | GNG3        | RAI2         | BTK           | FAM10<br>7A  | ZNF697         |
| RSPH9          | PLA1A         | ANO3         | HSPB9        | SMIM3<br>3   | KRTAP2<br>6-1 | AK7          | FGF18       | SNORD42<br>B | SHANK<br>1    | GIMAP6       | ADAMT<br>S4    |
| CLVS1          | TPH2          | SYNDIG<br>1L | LRRN2        | DNAJC6       | C13orf4<br>2  | SHE          | LRMP        | SLC47A1      | LRMDA         | LHX6         | PCSK1          |
| ZNF582         | TEX22         | ESRRG        | FLT4         | NECAB1       | ECEL1         | SNORD<br>42B | ESR2        | TBX2         | GNG13         | SPINK1<br>4  | NAPSA          |
| KLHL13         | GCM2          | PKD1L2       | RND1         | PANX2        | PARVB         | GATM         | SLC18A1     | ADGRE1       | RN7SL2<br>30P | SOX17        | DES            |
| WNT8A          | SLC6A1        | KCNG4        | SLC34A2      | DLGAP1       | SSTR2         | MYT1L        | ST3GAL3     | ZDHHC19      | KCNK1         | DEUP1        | SNORD<br>110   |
| NECAB1         | ADRA2<br>C    | LMX1B        | APOB         | CYP27A<br>1  | PRR19         | SNORD<br>62B | GGN         | MCOLN3       | SNORA<br>5A   | ANKRD<br>63  | S100A2         |
| STAC2          | SERPIN<br>A11 | PAQR8        | CCNJL        | NFAM1        | PLPPR5        | SEMA3<br>G   | ALPL        | FAM19A5      | CD3G          | SCARNA<br>18 | CD79A          |
| TPBGL          | MIR128<br>-1  | ENPP6        | OIT3         | A2M          | GPR179        | HIC1         | MAGEE2      | PRF1         | ATP1B2        | B3GNT4       | CLGN           |
| CCL7           | CNKSR2        | UBXN1<br>0   | HRNR         | IL20RA       | ZNF35         | MYO1A        | GCM2        | GABBR2       | DLGAP<br>3    | SLC13A<br>2  | SYT13          |
| KCNMB4         | SNORA<br>55   | SNORA<br>2C  | ADIG         | SLC9A7       | EPHA6         | FER1L6       | M1AP        | ADAM21       | RAB36         | PEG10        | CSF2           |
| RIMS1          | CCDC10<br>5   | FAP          | SLITRK4      | WDFY4        | ITIH1         | TRIM9        | CFAP46      | POU3F3       | CD28          | BECN2        | KCNJ8          |
| ENPP6          | TRIM46        | CEP295<br>NL | FOXF2        | TRPC4        | SFRP2         | CCDC17<br>5  | KCND1       | CBLN3        | CPZ           | ADAMT<br>S20 | MYH8           |
| COL8A2         | ABCG8         | PADI3        | PTCRA        | LMCD1        | MIR423        | PRR35        | SNORA2<br>C | COL8A1       | B3GAL<br>NT1  | ATP13A<br>4  | KCNC2          |
| NLGN1          | PTP4A1        | SCARN<br>A5  | NDNF         | CORIN        | SLC6A1        | CRP          | SCARNA<br>6 | CHST7        | NRN1L         | CEL          | P2RY12         |
| ATP2A3         | RYR3          | NEK5         | RGSL1        | UPK3B        | ACTG2         | CLNK         | CSF2        | CYP7B1       | CNGB3         | BHLHA9       | SMIM1<br>8     |
| APOBEC3<br>H   | ALDOB         | BICD1        | KLF12        | SP8          | MYBPC<br>3    | TNNT3        | CNDP1       | LRRC18       | FAM16<br>9B   | PROK1        | ST8SIA3        |
| COL19A1        | TSSK1B        | NR1I3        | TIMP1        | TNFRSF<br>1B | SNORA<br>54   | GRM6         | SYT16       | KCNQ3        | LRRC26        | ADAMT<br>S13 | AL0968<br>14.1 |
| ELFN1          | SLC51A        | RPTN         | ETV1         | DDN          | NKX6-2        | GPR1         | IGSF11      | ADAMTS<br>15 | IHH           | LHX4         | METTL1<br>1B   |
| HMCN1          | NDST4         | ALPL         | FUT7         | EXOC3L<br>4  | C3orf67       | TNF          | ACTG2       | PPM1E        | LRRC71        | HES3         | NPFFR2         |
| ADAMTS<br>7    | TSSK3         | CXXC4        | FOXI3        | SLC9A5       | C1QL4         | SRMS         | A1CF        | TSPAN18      | KRT71         | MT-<br>CO2   | HS6ST3         |
| C1orf158       | MEIS3         | CDH15        | SNORD3<br>8B | RASGRP<br>4  | WT1           | CIB3         | LONRF2      | DNAAF1       | CLEC3B        | GIMAP4       | RAPSN          |
| FGFR4          | OPCML         | IQCD         | HEYL         | PDGFD        | NPFFR1        | ADCYAP<br>1  | RF02187     | RAX          | PRR22         | FOSL1        | ZC2HC1<br>B    |
| RNU6-<br>1095P | DPEP1         | CNGA2        | SLC4A5       | GP1BB        | BARX1         | SGIP1        | SLC30A3     | MGAT4C       | FKBP14        | GAREM<br>2   | MIOX           |
| GPR18          | KCNE3         | GRM8         | TM6SF2       | CBLN2        | CLDN18        | COMP         | PTPRH       | GRM2         | IQCG          | CCDC19<br>8  | BARHL2         |
| ASB10          | TYR           | TNNT1        | BCL2L15      | CD69         | RALYL         | SLC9B1       | NANOS3      | TRPC7        | SNORA<br>55   | FAM11<br>OD  | CYP26A<br>1    |
| ALX4           | IGSF9B        | FAT3         | CARD9        | ESRRG        | TDRD5         | MCOLN<br>3   | DPT         | F5           | JAM3          | DNM3         | NPFFR1         |
| RF00091        | VWA3B         | MYT1         | C11orf96     | AGBL4        | OR52N<br>5    | TBATA        | TMEM11<br>7 | THBS4        | METR1         | HID1         | CRYBA1         |
| HAPLN2         | FAM22<br>2A   | ADAMT<br>S12 | RPRML        | ATP1B4       | ARMCX<br>4    | SOX17        | KLRK1       | HK3          | ATP13A<br>5   | PRKAR1<br>B  | PTH2R          |
| HAO1           | KLHL10        | ASPA         | FXYD2        | SLC22A<br>6  | AFM           | H1FNT        | RF02271     | EPHA5        | TMEM1<br>36   | TMEM7<br>4B  | SPTA1          |

|          |          |          |           |          |            |          |            |          |            |          |           |
|----------|----------|----------|-----------|----------|------------|----------|------------|----------|------------|----------|-----------|
| NOVA2    | CACNA2D1 | ACP7     | MAPK4     | BSND     | VASH2      | RPRML    | TH         | OSR2     | CCNJL      | ZNF605   | TEX12     |
| PRAM1    | CNTNAP2  | EN1      | RNU6-120P | NUTM1    | HIST2H2AB  | RBPMS2   | EMILIN2    | GLP1R    | ADAMTS19   | HTR2A    | CPNE4     |
| TEX44    | RUNX3    | PAX5     | DYSF      | GPR158   | PHOX2A     | SMIM18   | KCNF1      | RADX     | RNU6-290P  | PAK5     | ATCAY     |
| HJV      | IHH      | NKAIN3   | PDGFRA    | HSH2D    | AC008736.1 | ATP4A    | SACS       | FRMPD3   | PEAR1      | MIR711   | ONECT1    |
| C1orf54  | GDAP1    | GIMAP8   | SLC26A10  | RN7SKP89 | KLRK1      | ADAMTS15 | A4GALT     | RPE65    | SHANK3     | HCN3     | FOX11     |
| OLIG2    | CCDC159  | MYOZ3    | VAV1      | P3R3URF  | SNORD121B  | MRPL53   | ARHGDI5    | SLC19A3  | SPEM2      | SUN3     | RNF148    |
| SPEM2    | ABCC8    | GLYAT    | ISL2      | TMEM232  | PGLYRP1    | COL6A6   | NLGN3      | IQSEC3   | RNU6-1044P | P2RY10   | FOXD1     |
| MFS06L   | C19orf81 | CORO2B   | NAPSA     | KLHDC7A  | LRMP       | VWF      | GPR82      | SLC12A1  | CAPN12     | PTPRD    | IFNK      |
| SNORA63E | TRIM9    | CCDC175  | KCNE2     | SRRM4    | GBP5       | LY9      | NPPC       | ABCC9    | PNCK       | LOXHD1   | TRPM2     |
| MIR345   | STK31    | SCRT1    | SBK3      | CPNE6    | WFDC2      | IL17F    | DNAAF1     | ADAD1    | KRT27      | CACNA1H  | FGF18     |
| MIR106B  | FBXW10   | SCART1   | NMNAT2    | DMBT1    | BVES       | TTC25    | RNU6-1280P | TMC1     | TNFSF13B   | SLC9B1   | CBFA2T3   |
| RNU2-58P | GPR34    | MUC13    | PP2D1     | IL27RA   | LINGO3     | CHRNA2   | GPD1       | CD69     | ASCL4      | MIR628   | CLDN20    |
| SUSD5    | RAI2     | STPG4    | HVCN1     | TCHHL1   | S100A2     | DISC1    | ADAMTS13   | SIX3     | TEKT1      | GJC1     | DDIT4L    |
| SDR42E2  | CLDN14   | TAL1     | CCNA1     | AIF1L    | TMEM26     | SLFNL1   | KRT36      | GUCY2F   | IDO1       | CCDC69   | CCDC196   |
| MISP     | SKOR1    | KCNA4    | ZEB2      | COLEC12  | CIDEC      | TNP2     | KLHL14     | METTL11B | AATK       | EMCN     | HDAC9     |
| NAP1L5   | SNORD62B | CCN4     | INHBA     | LRRC4B   | RANGRF     | CAMP     | BICC1      | FOLH1    | SLC26A5    | GASK1B   | ASB2      |
| UTS2     | AIF1     | CHRDL1   | GATM      | TDRKH    | C12orf75   | CNTN2    | GNG2       | BEST3    | TFAP2D     | ACBD7    | RAB39B    |
| TM4SF20  | ADAM11   | MCEMP1   | CA3       | COL25A1  | JPH4       | FUT7     | ATP13A4    | HNF1B    | MRAP2      | CPNE7    | FOXD2     |
| FBXO39   | CCBE1    | SOAT2    | SNORA23   | TSPAN1   | ANKRD40CL  | LIN28A   | ITM2A      | MEP1B    | SAMD13     | FBLN2    | IGFBP2    |
| PRAP1    | CHRM3    | CPLX4    | PRSS27    | AGBL2    | SNORA62    | CTXND1   | MYO15A     | AKAP3    | TTC24      | HIST1H4B | SV2B      |
| C16orf86 | RBF0X1   | IGSF1    | FHAD1     | PCNX2    | WIPF3      | GATA1    | NR4A3      | CEACAM18 | GPR17      | CHADL    | SLC25A34  |
| PLA2G5   | TBX15    | ACTG2    | FMNL1     | SNORA12  | TNIP3      | CHAT     | DUSP13     | MYRFL    | AFP        | PRUNE2   | RN7SKP127 |
| SEBOX    | ITGAL    | RF00212  | ZDHHC22   | SEMA3B   | SNORD53B   | PLA2G3   | SYTL5      | ARHGAP36 | MYL3       | CD96     | KRT72     |
| FRMD3    | WDFY4    | C2CD6    | ADAM11    | INHBA    | IFITM5     | ASPHD1   | KLK6       | CSF3     | TMEM233    | ZNF449   | CNGA3     |
| ELOVL2   | UNC45B   | SNORA47  | RANGRF    | SNORD11B | PTPN22     | C4orf45  | FOXF1      | ASB10    | LDOC1      | HOXB9    | GRID2     |
| MIR221   | S100Z    | MEOX2    | PCARE     | NLRP6    | GCNT1      | IQCG     | GPHB5      | LRRC17   | SELPLG     | SLC17A8  | DAZL      |
| COL28A1  | ROPN1L   | ZKSCAN2  | PIK3CG    | EMCN     | SHISA4     | SLC44A3  | CCDC152    | C3AR1    | CLDN19     | MT-CO3   | NOBOX     |
| FRMD7    | HAAO     | CHST11   | ADGRF1    | KCNJ9    | HAVCR2     | TAL2     | SNORD62A   | RSPH6A   | SLC27A2    | INSRR    | SLC34A3   |
| MPP3     | LRCH2    | TSPAN12  | SULT6B1   | AK5      | SLC27A5    | PRSS57   | GALNT16    | PNMA8A   | CD2        | KIRREL3  | SLC6A12   |
| PCSK2    | ZNF423   | C10orf62 | OPN5      | LRRTM3   | EREG       | SNORD117 | DNAH10     | OR2A5    | HFM1       | BST1     | BRINP2    |
| LTK      | CPNE9    | COL28A1  | HGFAC     | SHANK2   | NOX4       | PRRT1    | CLDN20     | GPR20    | DOC2B      | CDKL4    | ALDH8A1   |
| PKD1L2   | CLIP3    | MYRIP    | RSKR      | MB       | USHBP1     | NSUN7    | CFAP54     | LRTM1    | C9orf24    | SRSF12   | NDST3     |

|               |           |           |            |           |          |            |             |            |            |           |           |
|---------------|-----------|-----------|------------|-----------|----------|------------|-------------|------------|------------|-----------|-----------|
| GRIK3         | INSC      | GASK1B    | PDZD9      | NTN3      | LBX2     | OR8D4      | CCDC36      | MSGN1      | FAM155B    | ARMH1     | PABPN1L   |
| SLC6A15       | BOLL      | ITGA8     | ALDOB      | ADAMTSL1  | TBXAS1   | SEMA3A     | EBF2        | CFAP65     | 12-Sep     | EGR2      | SSTR3     |
| PDE6B         | ITK       | SEMA3E    | ESPNL      | AVIL      | CKM      | KLK12      | ARL11       | FBXO40     | COLQ       | KCNJ10    | RNU1-100P |
| SARM1         | KCND3     | MAP7D2    | ISM2       | KIAA1614  | KCNH5    | HID1       | SORCS1      | PLCXD3     | SNORA80E   | RASGRP3   | RNU6-931P |
| SYNJ2BP-COX16 | RNU6-290P | MYBPC3    | C5orf49    | HIST2H4A  | TFPI     | SRRM3      | CPA3        | KCNK3      | RF00340    | CACNA2D2  | ZIC1      |
| ITGAX         | SPATA17   | CCDC92    | CFAP57     | EMID1     | FBXW10   | LRRCS2     | CACNA1H     | GK2        | CALY       | TEAD2     | FASLG     |
| VNN3          | HECW2     | TNFRSF11B | CLIP3      | STOML3    | KIAA1324 | DNAH6      | MMP12       | OR6Y1      | LBX2       | SEC16B    | TPPP2     |
| SPINK6        | HECW1     | B3GNT6    | SLC29A4    | MATN4     | CYTL1    | TSPAN18    | ADGRF3      | IL1RAPL1   | BANK1      | DNAJC22   | HORMAD1   |
| ZBP1          | CD38      | COL6A2    | CDK14      | COL15A1   | CLHC1    | RIBC2      | RASGRP2     | OR9Q1      | SCGB1A1    | CERKL     | CCDC22    |
| SAPCD1        | SPO11     | WNK3      | ZFHX4      | C20orf144 | LRP1B    | EFCAB9     | SLC25A21    | MAGEL2     | TSKS       | CASQ1     | SCGB3A2   |
| ACTL7A        | C7        | SNORD17   | LAMA1      | SLIT2     | RNF183   | RF00153    | CIDEC       | MYH13      | LINGO4     | CCR2      | DLGAP2    |
| ANK2          | PATL2     | STXBP6    | C12orf75   | SARM1     | TMC3     | ERG        | ADGRG5      | AGBL4      | PROCA1     | FAM78A    | TAS2R41   |
| RADIL         | SLITRK4   | CDH5      | C19orf71   | SNCAIP    | HNF1A    | CHST2      | HMX2        | GPBAR1     | Z98752.3   | RNU105C   | RF00026   |
| NID1          | OLIG3     | COL14A1   | AJAP1      | MEGF10    | ZNF521   | GCK        | CDC20B      | RNU6-178P  | OBSCN      | SRRM5     | EIF2S3    |
| SLFN5         | CDH12     | PCDHGA11  | SYNPO2L    | HIF3A     | GDF11    | PHLDA2     | LRRC9       | RNU6-1279P | FAM89B     | DPP6      | BTN3A1    |
| AGR3          | NKX3-2    | FGF18     | GNPNAT1    | ADAMTS8   | RF00604  | GPR18      | PLA2G10     | RNU1-14P   | PTPRN      | SLC45A1   | HPX       |
| BLK           | MROH7     | CCN2      | KRT73      | HYDIN     | ARPP21   | TRDN       | CD6         | KNDC1      | SLC34A2    | LVRN      | SEC14L5   |
| SNORD63B      | TRHDE     | FOXE1     | INMT       | XIRP1     | CPNE9    | BLK        | SALL4       | DDX3Y      | AC087651.1 | MYOZ1     | DNAH5     |
| NPW           | KCNC1     | LSMEM1    | UNC80      | HCAR1     | BCAT1    | LSMEM1     | FGF16       | TAAR5      | SNORD62A   | TMEM163   | SLC38A1   |
| DGKG          | MAPK4     | PCDH12    | ZSWIM5     | COL6A2    | ISLR     | FRMPD4     | MPPED1      | CCIN       | MYO15B     | TMEM215   | SNORA58B  |
| TNFSF13       | FUT9      | DIO1      | AC008736.1 | RBM24     | CDH20    | HUS1B      | MRGPRG      | OR52D1     | KCNIP4     | BATF3     | MIR27A    |
| RNU6-200P     | SMIM41    | LAYN      | SYT2       | PNCK      | TRPC7    | PARVB      | SIX1        | SNORA35B   | BRMS1      | GBGT1     | PPP1R3G   |
| RHOC          | CACNA1H   | CHRNA9    | RGS14      | TMEM132D  | MLIP     | HIST1H2BM  | MIR652      | RF00411    | GPR151     | RNF151    | ARNT2     |
| TSLP          | FMN2      | RS1       | TTLL9      | PLLP      | ATOH1    | AL096814.1 | MIR874      | RN7SL838P  | TMEM8A     | SPINK1    | MTUS2     |
| GFRA3         | FGF5      | PRMT8     | VPS25      | HAPLN1    | ADGRB3   | GLIS3      | NLRP12      | PCDHA2     | SERPINE2   | HRASLS5   | EPHB1     |
| DUOX2         | PRLHR     | NDST3     | TG         | CHRNA1    | ATF7IP2  | LVRN       | RNU4-34P    | AC010616.1 | PACRG      | LONRF2    | CARMIL2   |
| STAT4         | NT5C1A    | SNORA5C   | CYP17A1    | DHRS2     | IQCH     | CFAP65     | RNU6ATAC14P | DAZL       | KCNK16     | RNU6-11P  | KRT2      |
| TACR1         | TBATA     | PTAFR     | SNX20      | ASIC4     | NCAN     | CXorf21    | RF02104     | LVRN       | ADAP1      | RNA5SP463 | HCST      |
| SYN3          | H1FNT     | RNU6-243P | C11orf91   | LMNTD1    | MIR628   | CAMK2A     | RF02271     | HTRA3      | SULT6B1    | LARS2     | TEX54     |
| CH25H         | GP1BB     | DISP3     | RIPOR2     | CCDC146   | SNAI1    | P2RY13     | PDGFRL      | CACNA1I    | MMP19      | CNTN3     | GLIPR2    |
| TNFRSF13B     | F5        | KIAA0319  | TH         | DOCK2     | GATA1    | RECK       | SLC5A5      | ELAVL4     | CFAP70     | ATP6V1G3  | ZNF385B   |
| RGS6          | GK2       | TWIST2    | ARMC12     | CCDC33    | IQCA1L   | KRT71      | PALM3       | UBQLNL     | ADGRG3     | CPXM1     | EPHA3     |

|            |           |            |          |          |           |          |           |         |           |          |          |
|------------|-----------|------------|----------|----------|-----------|----------|-----------|---------|-----------|----------|----------|
| SNORD98    | PEBP1     | HABP2      | APOD     | FLNC     | TRDN      | C19orf89 | DSG4      | SKOR2   | C19orf38  | SRPX2    | SNORD18A |
| HAVCR2     | TAL1      | ROBO4      | C12orf56 | ANKRD65  | IGSF1     | TSPAN33  | SRRM5     | ZIC5    | SLC44A3   | MYT1L    | SLC9B2   |
| RNU6-638P  | KCNA3     | OR6X1      | PPP2R2B  | CACNB2   | PCDH12    | DLL4     | KIAA1211  | RGS22   | PRSS35    | RTN1     | RCN3     |
| PFN4       | CYP19A1   | RNU6-929P  | STPG2    | WDR38    | NDST3     | MMP23B   | KLK13     | TUB     | IGF2BP3   | CHST13   | KCTD16   |
| LRRC19     | FAM166A   | CLEC4G     | PRELID3A | HERC6    | GK2       | HAAO     | KLKB1     | SGCZ    | IGFBP6    | HOXC9    | ACSBG2   |
| DOC2B      | PIWIL1    | HIST1H2BE  | SYT9     | ARID3B   | THEMIS2   | CDCP2    | XIRP1     | FGF14   | DLEC1     | ANGPTL1  | FADS2    |
| ZAN        | PRDM5     | ST6GALNAC4 | KLK6     | UBXN10   | NPS       | CD180    | ST8SIA1   | MUC5B   | TEX14     | MINAR2   | OTOP2    |
| HS6ST2     | KCNA4     | C1orf146   | IL1B     | GNG2     | SYT16     | HCN4     | SNORD127  | GFPT2   | TNN       | ZBP2     | ABCA9    |
| CHRD       | LINGO2    | RPL7A      | PATE2    | EGFLAM   | IRX6      | NXNL2    | SMC1B     | RTN4RL2 | ZC4H2     | ALS2CR12 | MROH2B   |
| CRACR2A    | MYL1      | GNG13      | LOXL1    | CYP2U1   | MSTN      | HAPLN3   | TNNI1     | KLHL33  | SLC41A3   | NEK11    | C10orf99 |
| MMP21      | C13orf46  | KYNU       | TTN      | C19orf66 | NEK10     | MIR423   | HGD       | ZNF697  | ANKRD40CL | CFAP52   | HRH1     |
| P2RY4      | ALDH8A1   | DGKG       | TSSK1B   | FGF18    | RNU1-100P | KCNJ11   | PLIN4     | DMBT1   | RUNX3     | ADAM32   | BEND6    |
| MAMDC2     | ANKUB1    | IL2RB      | STAP1    | ISLR2    | ETV1      | GALNT14  | RPL36     | PPP1R9A | NPHS1     | GJC3     | RGS18    |
| ST6GALNAC4 | CNGB3     | C20orf96   | PTK6     | CFAP45   | B3GNT4    | MKX      | GABRB3    | PDZK1   | FFAR4     | ITGA9    | SP6      |
| THEMIS2    | SCN2A     | PSTPIP2    | LCP1     | SCML4    | CDH10     | CALML4   | TSGA13    | CXorf21 | ESPNL     | SYNPO2L  | NKG7     |
| RBPMS2     | NDST3     | DLL3       | PAX8     | LGR5     | NPAS3     | UNC45B   | NEK11     | PKD1L2  | CLEC4A    | ARL11    | B3GALT2  |
| NPS        | KCNJ4     | KCNMA1     | TMEM88B  | KCNK10   | GFI1B     | METTL7B  | GDF7      | AQP5    | C2CD4D    | FGF17    | SCARNA12 |
| GRIN2B     | CLVS2     | MIR10A     | CHAC1    | ADAMTS5  | RFX6      | CHRNA4   | CPB2      | CYYR1   | PTPRC     | FSCN3    | PRRT4    |
| KCNS2      | ABCC12    | RBM11      | SNTG2    | UBAP1L   | WSCD1     | ZNF575   | MYL3      | HTR6    | S100Z     | C12orf71 | ENTPD1   |
| TNP2       | ADAMTS13  | FAM184A    | MFNG     | BMX      | CCDC178   | EBF1     | PPP1R42   | KCNE2   | RNU4-89P  | SNORD117 | TDRP     |
| THBS4      | RNU6-895P | AC055839.2 | PDE6B    | PPP1R14D | MYO3A     | DNAI1    | C1QL4     | MAP7D2  | CADPS2    | SPP2     | TMEM169  |
| GNRHR      | IRX6      | GLIS3      | CAPN8    | EBF1     | RP1       | GPR65    | MYOD1     | TMOD1   | LY6K      | KCNA3    | CD163    |
| LRRC17     | MYOD1     | ERICH5     | ALOX15   | TMEM150C | NEUROG2   | SCART1   | MMP20     | GRM8    | C18orf54  | SPTSSB   | PPP1R27  |
| NPPB       | TUBB1     | LMX1A      | 3-Sep    | SPARCL1  | CSF3R     | LGI4     | PRTG      | ANO3    | PI16      | TEPP     | NRXN3    |
| SYT16      | GPC5      | SPACA9     | NOX4     | KLKB1    | DKK4      | C2orf73  | FAM50B    | MSH4    | CCDC155   | PHACTR3  | SFXN4    |
| ZNF804B    | NKX2-2    | OXT        | GPR182   | ADAM11   | SPATA19   | DENND2A  | NOL4      | P2RY13  | F7        | VGLL1    | MAP6D1   |
| CPB2       | DRC7      | PRAM1      | TRIM63   | CCRL2    | RSPO4     | ANKRD34A | KLHL34    | PLIN1   | PAPOLB    | PEBP4    | CORIN    |
| KCNA6      | IGDCC3    | CASQ1      | MTUS2    | TRPM3    | SLITRK2   | CFAP69   | OR6F1     | RFTN1   | SLC39A4   | RXFP2    | B4GALT5  |
| SLC1A7     | RUBCNL    | TMOD1      | FSTL4    | LRIG1    | TAAR9     | FOXF2    | OR4D6     | FOXF1   | GPR183    | LRRC66   | RFTN2    |
| CCN4       | GPR176    | NKD2       | EMID1    | HCN3     | SMCO1     | SUN3     | TMIGD3    | SFXN4   | SNORD63   | PLEKHG1  | TNF      |
| FOXH1      | BHMT2     | RNU4-89P   | NHLH2    | SHANK1   | ZG16      | PTHLH    | RNU6-174P | FSTL4   | QPCT      | EGR4     | EID3     |
| SAXO1      | MC2R      | GSDMA      | SLAIN1   | NT5E     | VSTM4     | CNGA2    | GMNC      | TNFSF12 | KIT       | SMOC1    | APBA2    |
| AFP        | OR6K6     | PNMA3      | IKZF3    | DAGLA    | MIR216A   | AGXT     | TOX       | AGTR2   | CBLN1     | SERPINF1 | UTS2     |

|               |                |               |               |               |               |               |              |               |                        |              |                |
|---------------|----------------|---------------|---------------|---------------|---------------|---------------|--------------|---------------|------------------------|--------------|----------------|
| LRRRC9        | DNAJB8         | RSPO1         | HAVCR2        | RTP4          | MIR203<br>B   | GPM6A         | EEF1A2       | SLC6A19       | EOMES                  | CCN6         | NEFH           |
| LHX4          | ATP6V1<br>E2   | IRF4          | CBFA2T3       | GULP1         | UBE2U         | CRNN          | FCER2        | DTNA          | CCT6B                  | ARPP21       | GUCA1<br>B     |
| ADAM33        | ACO736<br>11.1 | CFAP44        | STX19         | HAS2          | IGSF21        | ACE           | TRIM63       | TSPAN33       | KPNA7                  | SIX2         | ACO210<br>72.1 |
| PHACTR3       | MUC4           | NES           | SYNE4         | ADGRB<br>1    | LY6H          | RN7SKP<br>231 | RTL9         | PEBP1         | RIPPLY2                | EPHB2        | BMPER          |
| ENPEP         | PLSCR5         | ZFP92         | SLC6A15       | CCN2          | MAMD<br>C2    | GDF5          | APBB1IP      | ALX4          | OR6C3                  | HCK          | PDE1A          |
| RLBP1         | CCDC14<br>1    | CNTN4         | CALHM4        | ZNF382        | C20orf1<br>73 | ERC2          | KCNH7        | ITIH3         | SPPL2C                 | GIMAP1       | BATF           |
| TMEM74        | ODF3B          | KANK4         | GOS2          | AIFM3         | DOK5          | SLPI          | SNORD1<br>1B | TRIM36        | NRGN                   | NALCN        | PLIN5          |
| MIR151A       | PDZD3          | TMPRSS<br>7   | SLC39A4       | APBA2         | PATE2         | CYB5R2        | FXYD4        | KDR           | NOTO                   | GBX1         | DKK2           |
| CCDC190       | SLC29A<br>4    | ELAVL2        | SATB2         | SFRP5         | BRMS1         | AKAP14        | FAM169<br>B  | SOX30         | CNIH3                  | SKOR1        | HTRA3          |
| TRIM34        | DNAI2          | ARHGA<br>P20  | NWD2          | NEK5          | FYB2          | UPP1          | OAZ3         | FBXO27        | MRLN                   | TNC          | SNORA<br>2B    |
| OR11G2        | TNFSF1<br>1    | RRH           | F13A1         | SETBP1        | APC2          | ASPA          | NRXN3        | CAPN11        | STKLD1                 | TMEM5<br>9L  | NLRP3          |
| OR5A2         | 4-Sep          | RAB3C         | LPAR4         | GLIS3         | ARHGA<br>P30  | SVIP          | LIPN         | NTN3          | PGR                    | FABP4        | SLC22A<br>6    |
| SFXN4         | MYRF           | RNU6-<br>290P | RHOF          | EBI3          | TMEM8<br>A    | ASCL3         | RN7SKP5<br>6 | FBXL7         | UBASH<br>3A            | DLG4         | OTOS           |
| VIL1          | TWIST1         | PPARGC<br>1A  | RTBDN         | SYN2          | PLVAP         | PPP1R1<br>B   | RNF17        | KCND1         | COL6A3                 | AMER2        | PAMR1          |
| HIST1H2A<br>E | TMOD1          | PIPOX         | DPEP3         | SDSL          | ANXA9         | TTR           | PLA2G2E      | THSD7A        | ST3GAL<br>3            | REP15        | SNORD<br>123   |
| EFEMP2        | TTC16          | PLEKHS<br>1   | BCO2          | C20orf9<br>6  | NYX           | PABPC4<br>L   | FRMD7        | ZC3H12D       | FNDC7                  | HIST2H<br>4B | MFS6L          |
| CPSF4L        | VEGFC          | ASCL5         | AK5           | DENND<br>3    | CCDC30        | ETV1          | SPATA45      | HCN4          | ISL1                   | DPYSL3       | MMP20          |
| TRPV1         | KCNV2          | LGR5          | TMEM35<br>A   | C19orf8<br>5  | SLC18A<br>2   | DMRTA<br>1    | HVCN1        | FGF7          | SPATA2<br>0            | GPR75        | IL13           |
| LRRRC15       | ILK            | CACNB<br>2    | EXOC3L4       | OIT3          | PAX7          | RNU4-<br>58P  | VIPR2        | C7            | CASKIN<br>1            | GRASP        | NPHS2          |
| PCDHGA3       | C1orf16<br>2   | TBC1D9        | TBX6          | RBM11         | IKZF1         | IFIT2         | SNORA2<br>0  | MYO7B         | SLIRP                  | AIF1L        | PCK1           |
| LGR5          | SPRR4          | SNORA<br>55   | HPSE          | RN7SKP<br>231 | IGF2BP<br>3   | LRRD1         | IPCEF1       | RNU6-<br>511P | C2orf40                | SNORD<br>34  | RPH3A          |
| MYO15B        | C3             | HSD17B<br>2   | MATK          | FUT7          | COL6A3        | RHAG          | SMIM22       | KCNJ11        | RAB44                  | THSD7A       | TEX29          |
| HIC2          | PTPN7          | EML1          | MCOLN3        | FLT4          | CFAP54        | GJC3          | PRR18        | MAEL          | ST3GAL<br>1            | SLC35F<br>1  | EDIL3          |
| RTN1          | LEF1           | NECAB1        | GRIA3         | HOXC1<br>0    | HRCT1         | LHFPL2        | ANO4         | C5orf52       | TNIP3                  | RPRML        | ZEB2-<br>AS1   |
| PLXNA4        | PLCB2          | EPHA3         | AIF1          | SCARA5        | CELF3         | CD4           | CCDC158      | DOCK2         | SGCD                   | PTHLH        | RNU6-<br>969P  |
| SYT17         | PTGER2         | HEPACA<br>M2  | PIEZO2        | NUP62<br>CL   | CCDC15<br>9   | P4HA3         | TBX21        | SLC5A11       | RAB3B                  | PPM1E        | SYCN           |
| PACRG         | ATOH8          | KCNQ3         | GSG1L         | ADCY10        | AXDND<br>1    | C2orf40       | SGCE         | RTL5          | CHST1                  | SH2D4B       | RNU6-<br>701P  |
| KCNMA1        | MOGAT<br>1     | CHRD          | DRP2          | RNU6-<br>290P | DERL3         | SNORA<br>62   | C1orf105     | FBXO39        | SH3BG<br>R             | SCN3A        | RF0218<br>7    |
| ANKRD40<br>CL | CRABP1         | TSGA10<br>IP  | CRTAC1        | IL18          | CTSK          | TAL1          | DLGAP1       | FSD1          | WFDC5                  | NOXRE<br>D1  | PHYHD<br>1     |
| CCRL2         | HLX            | RF0217<br>6   | HIST1H2<br>BG | TRIM67        | MC1R          | LEPR          | NLGN1        | TCHHL1        | SCARA3<br>C11orf9<br>6 | DNAH9        | ITIH3          |
| TMEM15<br>1A  | FGB            | ITGAL         | ALB           | CCM2L         | VWA3B         | FNDC7         | KLHL38       | SRRM5         | CYR1                   | MYH11        |                |
| EREG          | SP140          | KIRREL3       | CPNE9         | JAKMIP<br>1   | PRSS42        | CABP7         | TLR4         | GIMAP8        | TMOD2                  | CNR2         | MYO5C          |

|         |          |          |            |           |            |          |            |         |            |          |           |
|---------|----------|----------|------------|-----------|------------|----------|------------|---------|------------|----------|-----------|
| SACS    | LHX3     | FIGN     | NEUROG3    | GPR18     | CHSY3      | MAK      | ELOVL3     | CRP     | PJKV       | KCNT2    | NEXMIF    |
| NCALD   | NPHS1    | SPATA17  | GABRA1     | CASS4     | KCNS1      | WNT8B    | IGF2BP1    | CCDC85A | COL2A1     | CCDC81   | TAS1R1    |
| FLNC    | FFAR4    | MYH6     | FUT4       | USH1G     | DLGAP3     | TIFAB    | COL2A1     | C5AR1   | ARTN       | LHFPL5   | HIST1H2BD |
| SLC9A2  | BMX      | SELE     | AL096814.1 | C14orf180 | FZD9       | KCP      | RNU6-1299P | ZNF831  | ACO11529.1 | IRF8     | CD244     |
| NTSR2   | CHRDL1   | CDH19    | MOAP1      | NKAIN3    | CUX2       | PREX2    | UPK2       | PRMT8   | CD27       | LRRC4B   | SOX30     |
| NAALAD2 | FER1L6   | PTGIS    | ELOVL2     | PTAFR     | CCDC102A   | LTC4S    | FAM184A    | CPNE7   | ILK        | RTKN2    | APBB1P    |
| NXPH1   | LIPN     | CPA3     | FAM89B     | PNMA3     | OLIG3      | ANKS1B   | NCKAP1L    | CDH15   | ITGAL      | HIST1H1A | C1QB      |
| MYO15A  | FBXO16   | MMP25    | P2RY2      | CLVS2     | PCDH9      | LRRC27   | FYB2       | DENND2A | TMEM45B    | C4orf54  | GABRB3    |
| FBXL2   | TULP1    | PDE10A   | HOXC4      | TMEM130   | DLX6       | TSHB     | SLC12A3    | CFAP69  | HEATR4     | ITIH2    | IL17B     |
| SBK3    | EFR3B    | CHGA     | ELF3       | ABCC2     | RARRES2    | KCNK9    | ZEB2       | TRANK1  | SYNE4      | SERPINA5 | MAPK4     |
| RGS8    | SHOC1    | MIR128-1 | KRT4       | SNORA17B  | SCARNA5    | SCN3B    | PENK       | CCL2    | CDK14      | PNMA1    | GABRG1    |
| WASF1   | EML1     | ASMT     | MTCL1      | KIAA0408  | ESPNL      | IFI44    | MRLN       | PTHLH   | RF00602    | CABP7    | REC8      |
| KLHL29  | SAMD11   | TM4SF19  | A4GALT     | PPP1R1A   | 3-Sep      | TNFRSF1B | ARMH1      | ANK1    | LENEP      | IQUB     | OR12D3    |
| PAQR6   | POMC     | RN7SKP11 | AIF1L      | AK8       | HVCN1      | SYN2     | RF00432    | PRKG2   | MFSD2B     | DIPK1C   | SLC3A1    |
| P2RX5   | TBX6     | LRRC74B  | AMH        | GLP2R     | GYPC       | CCDC102A | KCTD16     | GDF5    | KLHL22     | LRMP     | SYTL5     |
| RNF150  | SERPINA5 | CALCR    | IYD        | DCC       | TTN        | OR2K2    | PCDHGB4    | SLPI    | SLC35G2    | NOX1     | GUCY1B1   |
| SLC24A5 | SNORA21B | ASB15    | FZD9       | C2orf88   | BIN2       | SIT1     | NALCN      | UPP1    | RN7SKP11   | ZFP82    | SDS       |
| NPY     | PRR15L   | STRA8    | GRASP      | CADM3     | CLDN23     | MYOZ1    | ONECUT2    | KCNQ4   | ZNF473     | STMN2    | SMC1B     |
| RBM46   | HMGCLL1  | ATP4B    | TEX45      | STPG1     | PCARE      | STMN4    | TMOD1      | C1QTNF6 | LCK        | CDKL1    | PGLYRP1   |
| KIF1A   | CHRNA2   | NKX6-2   | PLEK       | HECTD2    | RNU6-1044P | NR2E1    | CXCR6      | IFIT2   | PIK3CG     | GUCY1A1  | SNORD53B  |
| SLC17A7 | PGR      | RTL3     | SERPINE1   | KLHL29    | ABHD16B    | HTR7     | TCAP       | NOG     | INTU       | CHRD     | IYD       |
| SEMA3E  | TP53TG5  | USP51    | GNG5       | HDC       | KCNIP3     | ANKAR    | FAM19A5    | PLB1    | LCA5       | GPR34    | MIR365A   |
| FOSL1   | B3GNT6   | PABPN1L  | ANGPTL1    | SCARNA11  | PHF21B     | LRRTM3   | TMEM136    | PREX2   | P4HTM      | SRPK3    | MIR23A    |
| HEPACAM | TCAP     | ECT2L    | BPIFB4     | RASAL1    | NOL4L      | SLURP1   | GALNT9     | FLNC    | FXYD4      | CHGB     | TNFRSF8   |
| GLI1    | C11orf16 | PAPPA2   | LOXL4      | PPM1E     | NHLH1      | MB       | ITIH3      | FAM20A  | RASAL3     | EFCAB10  | KIF17     |
| MCOLN3  | TSGA10IP | CDC20B   | PLCH1      | TRABD2B   | HS3ST1     | MYCBPAP  | RNU2-58P   | SYCE1L  | ANKDD1A    | TAS2R3   | TAL2      |
| EBI3    | HTR6     | RF02140  | GJA8       | ADH7      | SPATA6L    | CALHM6   | SNORD18A   | IFI44   | LYZL4      | KLB      | RNU6-384P |
| RNASE10 | TMOD2    | CD163    | SPATA45    | NTNG1     | ITIH3      | CPLX1    | GABRA4     | ELN     | ZBTB46     | SHROOM3  | OLFM3     |
| POU2F2  | CNGA3    | CTNND2   | TMEM178B   | ANKRD34B  | AMDHD1     | SYNPO2L  | NPW        | TDRD6   | LHFPL6     | SPINK4   | CLEC5A    |
| MMP9    | USP13    | TAC4     | CTSK       | LAMC3     | SNORA27    | FABP3    | PPM1E      | RAB3C   | FAM186B    | ZNF853   | KCNG3     |
| FBP2    | HCK      | SNORA80E | NTSR2      | RAMP1     | TMEM132B   | ART1     | RASL10B    | ABCG8   | ARMC2      | MYL1     | SNORD94   |
| SYTL3   | PCDHGA1  | HMCN1    | STYK1      | COL4A4    | EEF1AKMT3  | C11orf53 | MEIG1      | LRRTM3  | C1QTNF3    | KRT34    | LSMEM1    |



|           |          |           |          |          |           |           |            |           |            |           |            |
|-----------|----------|-----------|----------|----------|-----------|-----------|------------|-----------|------------|-----------|------------|
| OPTC      | RAB42    | SMIM38    | RASGEF1A | SLC14A1  | KHDRBS2   | GP5       | C1orf158   | MB        | SAG        | BCAS1     | TP53TG5    |
| RRAD      | SYN2     | NDST4     | LGALS2   | HIST1H4E | ARHGA8    | GPR62     | LMX1A      | PTCH2     | KIF6       | LAMC3     | GUCY2D     |
| CHRNA1    | AK5      | GATA2     | CD74     | KLHL13   | RAB44     | ASMT      | BARHL1     | C17orf98  | SAT2       | SLC2A2    | CCKBR      |
| ZNF641    | NDP      | FAM107A   | HOXA1    | SCRG1    | BEND4     | C9orf24   | KLHDC7B    | PABPC4L   | PCDHGA2    | C13orf42  | RNASE6     |
| KLHL31    | B4GALNT2 | PROCA1    | IL23R    | RUNX1    | MRO       | C1QL1     | TBXAS1     | PRAP1     | CROCC2     | TMEM236   | TGM2       |
| CCDC151   | CNN1     | CCDC102A  | SLC51A   | RTKN2    | TMPRSS11D | RGL3      | NR1H4      | SMCO3     | SRMS       | PRPH2     | CKB        |
| KCNJ6     | CHRN4    | DACT1     | SPINK4   | UPP1     | FGF       | MAGIX     | GPRC5D     | C20orf144 | ANXA3      | FCRLB     | OR211P     |
| STPG3     | SNORA27  | KIAA1211  | LDB3     | CALCB    | SLFN5     | RAB26     | KRTAP15-1  | VSTM2A    | SAMD9L     | IGSF1     | A4GALT     |
| FSCN3     | ZAP70    | ARHGFE9   | MATN4    | CCDC106  | APOBR     | MYBPC3    | MASP2      | PPP1R27   | STBD1      | SERPINA11 | SNORD66    |
| TMEM200A  | CARD9    | LHX2      | ELF5     | CBFA2T3  | GABRB1    | GMFG      | CCDC170    | GDF9      | CLEC6A     | ROBO4     | TLL6       |
| SLC9B1    | SFRP5    | ZNF521    | SNORD87  | PCDHGA5  | GIPC2     | MMP19     | HNF4G      | C1orf100  | RPS12      | HIST1H2BE | RS1        |
| IL17F     | CCDC65   | KCTD4     | TEX22    | ROS1     | PPP1R3D   | FAM171B   | ABRA       | CCDC152   | CD53       | HJV       | KDM5D      |
| SPAG4     | PCARE    | NXPH1     | BEST2    | ASB11    | CD52      | TMEM130   | EDDM13     | PDGFRA    | CDH11      | RSPO1     | SCN4A      |
| TMEM163   | TEK      | DUSP13    | CCT6B    | RAB39B   | SERPINF1  | ACTL7A    | CCN4       | ACCSL     | OPN15W     | MCIDAS    | DRC7       |
| DUOXA2    | CFAP52   | PCDHGA4   | CCDC24   | SLC2A10  | PRRT1B    | GPBR1     | SNORA47    | KCNH7     | P2RY2      | FGF16     | OSCAR      |
| GPR50     | STK33    | SLC12A8   | TNF      | CCDC151  | CCNA1     | SCN2B     | SNORA63E   | OR211P    | CAVIN2     | CELSR3    | GABRQ      |
| CHN1      | LIMCH1   | ARMCX2    | SYNGR3   | ADH4     | PYROXD2   | SYNGR4    | SLC22A2    | MECOM     | CP         | MYLK2     | FAM135B    |
| KCNQ2     | ATP6VD2  | KIAA1324  | FBXL22   | RGL3     | LCP1      | CABS1     | LRRC74B    | LTBP1     | GP1BA      | TEX46     | PENK       |
| HPSE2     | SLC24A1  | SCRG1     | ARAP3    | ADAMTS13 | HSPA12B   | TRO       | TTC9B      | STC1      | AC005551.1 | OR9A2     | DPY19L2    |
| PKLR      | AGXT2    | LRRC39    | ENHO     | CCDC184  | GMFG      | GABRG3    | SLC35F4    | TNFSF15   | LPXN       | CCR5      | ST6GALNAC5 |
| TLR7      | IGSF11   | MAGEE2    | AWAT1    | NOBOX    | NPM2      | MIR199A1  | FSIP1      | TENT5D    | GGACT      | NDST4     | ABCG8      |
| ASPHD2    | GGT7     | KCNH2     | EAF2     | LBX1     | PSTPIP2   | RNU6-365P | CACNG5     | RN7SKP56  | SLC30A1    | CPA4      | LEF1       |
| RNU6-243P | RNF222   | AMZ1      | XPNPEP2  | DUSP27   | ATP8B3    | GFRA4     | SYCP2      | FXD2      | GALR3      | NTN3      | NRCAM      |
| CCDC184   | AMBP     | GUCY1A1   | KCND1    | BARHL2   | A3GALT2   | OR6S1     | TAC1       | TAL1      | MEIOC      | CLEC3B    | MFAP2      |
| EQTN      | IL13RA2  | SLC20B1   | PAPOLB   | TG       | SHH       | CTHRC1    | OR11A1     | C5        | GNG5       | RELL2     | PLEKHS1    |
| ACP4      | CRMP1    | SERPINB11 | GSG1     | ELAVL3   | ADAP1     | TM4SF19   | MT-ATP6    | CD40LG    | LTK        | AQP9      | PLPP4      |
| C3orf67   | RASAL1   | RNF150    | FABP12   | ABCA13   | LRP11     | DRC1      | RNU6-270P  | GDF15     | C16orf54   | PCDHB7    | POU5F2     |
| RNU1-100P | RHBDL1   | DAB2      | SPRY3    | SLC25A41 | C9orf116  | CASQ2     | RF02174    | TMEM130   | CLEC7A     | GREB1     | IL9R       |
| CCDC22    | SNORD15A | FBLN2     | IGF2     | P2RX1    | RIAD1     | PITX1     | RF01879    | CCDC42    | B3GNT6     | KCNAB3    | GDF11      |
| CABP5     | EBF3     | NTRK3     | DOCK3    | COX8C    | MDK       | IDO1      | BX255925.3 | PLD4      | RN7SKP231  | FKBP14    | AC055839.2 |
| VMO1      | SPATA9   | NTM       | NLGN3    | SNCA     | FSCN2     | BTLA      | RAG1       | CTCF      | HLX        | FAT4      | LRRC75A    |
| KLHL30    | RNU4-1   | TSPAN2    | HS6ST2   | HSD17B3  | SPATS1    | MBOAT4    | TMEM121    | RNU1-123P | PKP2       | IQCG      | ATP2B2     |

|                |              |              |                |                |              |               |              |               |              |              |              |
|----------------|--------------|--------------|----------------|----------------|--------------|---------------|--------------|---------------|--------------|--------------|--------------|
| ZCCHC13        | ADAMT<br>SL2 | RASGRF<br>1  | IGSF21         | FFAR1          | ACSS3        | RNU6-<br>470P | SNORA1<br>2  | RNU6-<br>351P | GHRL         | TGM5         | MMP13        |
| EMX1           | ISLR2        | FOXC1        | ALS2CR1<br>2   | FAM18<br>3A    | NPY          | CFAP73        | PSPN         | ERICH3        | CCDC30       | PDZD3        | ZYG11A       |
| GDF6           | TXLNB        | AANAT        | ONECUT<br>2    | OR9H1<br>P     | RPTN         | FAM16<br>6B   | LPXN         | PKD1L1        | XK           | SLCO2B<br>1  | CD7          |
| KCNIP1         | CFAP70       | GCNT4        | HEPACA<br>M    | UBQLN<br>3     | PALM2        | MAS1          | RTN4R        | ACE           | RIBC1        | COL6A6       | CNFN         |
| DNAJC5G        | C3orf62      | GSAP         | PYY            | UNC13<br>C     | HIC2         | SCARNA<br>18  | FBXO27       | P2RY14        | GREB1L       | PLPP7        | ITGA11       |
| ADAM12         | ADAMT<br>S19 | CALD1        | CCN6           | MIR187         | ARG2         | SPACA1        | GJC2         | KALRN         | CEP295<br>NL | RAMP1        | CABCO<br>CO1 |
| OSCAR          | KRT82        | AGR3         | C4orf48        | CLDN19         | AOAH         | SCARNA<br>5   | LDLRAD1      | SVEP1         | PPP1R3<br>F  | MAPK1<br>5   | AMN          |
| KRT40          | SGSM1        | CPLX1        | GPX3           | AL0968<br>14.1 | TNFSF1<br>3  | GLIPR1        | LMO2         | KCNH4         | NR2F2        | C3orf18      | PLA2G3       |
| MCIDAS         | CCNJL        | 1-Mar        | STOML3         | USP44          | LRRC27       | PRRX2         | CNR2         | SOX18         | SCARN<br>A7  | PLCL2        | TGM1         |
| LRIT3          | RNU4-2       | ANGPT<br>2   | HIPK4          | CEP112         | CCDC17<br>7  | CES4A         | SOX5         | WNT2          | KCNJ14       | RGS6         | SLAMF1       |
| FRMPD2         | WDR38        | GPC6         | WNT8A          | TTC16          | CRYBA2       | MYOM<br>2     | SYT17        | GULP1         | GPD1         | CAMKV<br>C   | PPP1R1<br>C  |
| RNU6-<br>1122P | TMEM1<br>73  | GPR3         | ASB14          | ITIH2          | ASPN         | LOXL2         | C12orf60     | KHDRBS3       | PATE2        | ARHGEF<br>17 | LAIR1        |
| CYYR1          | SLC26A<br>1  | COL4A4       | CDHR3          | HLX            | SLC25A<br>43 | AFM           | P2RX3        | RFX4          | CHST9        | TMEM4<br>4   | SELP         |
| CYTL1          | CAPN8        | FCER1G       | FXYD4          | FBXO39         | GNPNA<br>T1  | PCDHB3        | SERPINI1     | CYP2U1        | ELAVL2       | AJAP1        | STUM         |
| KCNE2          | CILP         | IL13RA2      | PPP4R4         | PCSK6          | B3GNT3       | SLC10A<br>4   | SLC38A5      | ISM2          | MIR194<br>-1 | TSHZ2        | SCARF2       |
| SMYD1          | ABCG5        | RBP1         | AC00423<br>3.2 | DNAH1          | SYNM         | CORIN         | NOXRED<br>1  | CCDC177       | CD247        | RUNX1        | MAJIN        |
| GRM8           | WIPF1        | PRDM5        | CLDN7          | CCDC16<br>8    | C3           | FSCN2         | SCARNA<br>7  | STK32A        | CHIC1        | KRT19        | DNAI2        |
| ZDHHC22        | SLC28A<br>1  | GDPD1        | SDR9C7         | GPAT3          | ABCA8        | SHCBP1<br>L   | CD86         | VAX2          | ALAS2        | NEU2         | ARHGDI<br>G  |
| GDF11          | HDAC9        | ITGB1B<br>P2 | DEPP1          | SLC6A1<br>6    | PAH          | FAM12<br>4B   | QRFP         | FRZB          | DOK6         | FGA          | STC1         |
| GNAT1          | DDR2         | FER1L6       | NANOS3         | CD34           | PTGS2        | IL1RL1        | SLC7A11      | CNTNAP2       | ZP1          | CAPN12       | FAM21<br>7A  |
| RF00019        | CTSW         | DOK1         | COLEC12        | WAS            | HGFAC        | GDPD1         | PSTPIP1      | SFRP4         | TIGD4        | VWCE         | TMEM7<br>1   |
| PLIN1          | CCR10        | TMEM2<br>55A | P2RX2          | ADD2           | MYCBP<br>AP  | PTGER1        | CD84         | ANKS4B        | KCTD7        | PCDHG<br>B1  | RELT         |
| CDH9           | SLC15A<br>3  | THSD1        | CLDN20         | ARMC2          | CCDC60       | HEATR4        | LOXL1        | KCNH8         | GDPD3        | LRAT         | SNORA<br>21B |
| GMNC           | CD101        | AGTR2        | ELFN1          | SPINK4         | SLC39A<br>5  | CYP2U1        | RF02175      | R3HDML        | NT5C1<br>A   | HPCA         | MRV1         |
| PAX8           | ZBTB46       | MRV1         | LY6H           | SFTPC          | MIR27A       | PATL2         | RPL7A        | ITIH1         | PPP4R4       | TBX2         | TCF24        |
| ICAM2          | KLF14        | RBM46        | ZBP2           | BCL2L1<br>5    | NR2F1        | TMEM1<br>19   | MAP7D3       | ARHGAP2<br>0  | RPGR         | KCNQ4        | SFRP5        |
| TMEM17<br>1    | P2RY10       | SGCE         | PTPRQ          | EPB41L<br>2    | ECT2L        | ODF1          | RBP7         | PHOX2B        | PCDHA<br>C1  | MMP21        | TUBAL3       |
| LRRC34         | C1QL1        | CYP2U1       | GNAT1          | KCNT2          | KCNK1        | RN7SKP<br>89  | EID3         | SV2C          | RWDD2<br>A   | AMDHD<br>1   | DLGAP1       |
| LRG1           | PRSS16       | AATK         | SMIM24         | PLOD2          | ESR2         | SCARNA<br>12  | GNG13        | RNU6-<br>200P | KBTD1<br>3   | RNF32        | SNORD<br>11B |
| TRIM63         | SCUBE3       | CNTN2        | TMEM18<br>2    | BANK1          | JAZF1        | HCK           | MAPK8IP<br>2 | SCG5          | SOWAH<br>A   | ASCL4        | PCP4L1       |
| STK32A         | JAM3         | ADGB         | S100G          | PDE7B          | TTC9         | CDH2          | ARHGAP<br>40 | STK32B        | LHX1         | JMJD7        | NLRC4        |
| AC00423<br>3.2 | DRC1         | SH3TC2       | MMP23<br>B     | ADAM2<br>1     | MORN3        | LINGO2        | RILP         | LBX1          | NYAP2        | MYRIP        | TNFSF9       |

|          |          |          |            |            |           |           |           |           |          |          |            |
|----------|----------|----------|------------|------------|-----------|-----------|-----------|-----------|----------|----------|------------|
| HRH1     | LIPC     | CRISPLD1 | KCNK13     | CXCL12     | ACAP1     | OR51G1    | MPO       | KCNA4     | HMX2     | SDSL     | CACNA11    |
| RAB37    | LRP11    | PEAR1    | C10orf99   | SERPINI1   | AMH       | FCRLB     | PTGDR2    | PIPOX     | MYH6     | CACNA1C  | KCP        |
| KLHL38   | EXOC3L4  | COL8A2   | PLP1       | STAB2      | FLT1      | RASGRP3   | PLD6      | C2orf16   | CLEC11A  | PSTPIP2  | RNU6-929P  |
| MFRP     | CYP1A1   | ACSM3    | LRRC26     | CLIC5      | RGS16     | STAC      | ADAMTS12  | TNNC2     | RAPGEF3  | RF00604  | NFE2       |
| MYO16    | MPPED2   | SLC1A6   | NEFH       | SLC5A11    | NXPE3     | NEUROD6   | LIX1      | ACTC1     | RNF24    | ADGRL3   | PHACTR1    |
| FHAD1    | HS3ST1   | RTL5     | ACTL10     | CD248      | TEX15     | CCDC81    | P2RY14    | EFCAB9    | KEL      | PDGFRA   | RBM24      |
| CHRM5    | LINGO3   | RILP     | MAP1A      | CUBN       | HIC1      | TMEM215   | PLCD4     | DHH       | FAM124A  | C11orf16 | CCL17      |
| KRT8     | LST1     | ADAMTSL3 | COL27A1    | CASQ2      | CHRN4     | TTC34     | KCNK16    | GSC       | NGF      | IDO1     | ZNF366     |
| NRROS    | PDE1C    | GPR183   | GJC3       | SHROOM4    | SNORD38B  | OR1Q1     | RGS1      | FOXD2     | DEPDC1B  | FHL3     | SPAAR      |
| FAM186B  | FADS2    | ENKUR    | DNAAF1     | ANGPT2     | ACBD7     | RNU6-650P | FBXO41    | MYO16     | GMPR     | SCUBE2   | TRPC5      |
| AIM2     | C16orf54 | ENPP3    | C16orf46   | DNAJB13    | IL1F10    | NTS       | FAM78A    | SLC6A12   | PGBD1    | EVL      | SEC14L3    |
| ARFGEF3  | HCAR1    | BDNF     | ASPG       | PLCB2      | GPSM3     | C15orf48  | BRINP2    | FCRL1     | MOK      | SPATA6L  | ALDH1A2    |
| EHD3     | APOD     | CLDN5    | HCLS1      | HOXC9      | ATL1      | AVIL      | CCR9      | RASGRP3   | RNF224   | BCO1     | SLC7A9     |
| COX7A1   | NOX1     | MMP19    | VASH2      | JAM3       | OGN       | LRRC34    | TEAD2     | CNTNAP4   | MTMR7    | CHAD     | HCN1       |
| GKN1     | TMEM21   | NEXMIF   | RASL10B    | POU6F2     | RNY3      | FMO3      | GNG5      | SRPX2     | ACOXL    | STXBP6   | KLHL1      |
| MEOX2    | ACBD7    | KRT34    | BRSK2      | ZNF287     | CDH6      | CLVS1     | LRRC75B   | TRO       | NR1H3    | LDOC1    | ELFN2      |
| ANKS6    | FAM228A  | CHRNA2   | CORO1A     | ITGA9      | TMPRSS11E | PCP2      | JAM3      | MIR133A1  | IL7      | C1QTNF6  | CDH10      |
| PTPRT    | RPL7A    | TGM2     | JMJD7      | SCN2B      | FAM186B   | PAMR1     | IGF2BP2   | KCNA3     | CFAP126  | TTC25    | RNF186     |
| ACSM1    | SCARNA8  | PODNL1   | RNU6-1280P | PIH1D2     | PHACTR1   | VSIG4     | SLC29A4   | PHYHIPL   | KIAA0895 | F13A1    | RIMBP2     |
| COL6A2   | DES      | UNC5D    | TNNI2      | COMM5D     | EDN2      | RAPSN     | SNAP25    | RNU6-871P | ATP12A   | JAM2     | RNA5SP194  |
| LMOD3    | CD207    | ASPN     | GALNT12    | SCN1A      | TM6SF1    | STOML3    | KRT23     | BTBD17    | ADAMTS2  | C1orf100 | CALCR      |
| COX6A2   | SPAAR    | HOXB13   | CH25H      | EGR2       | EMILIN2   | ALK       | TEX14     | PON1      | WFIKN1   | MYO22    | ENPEP      |
| HIST2H4A | PIPOX    | ACTN2    | SGCA       | CAMKV      | LGALS12   | AMZ1      | CLMP      | MPL       | RPL36    | C4orf48  | TSBP1      |
| SCARA3   | BCO1     | ENO2     | SLC10A6    | ARMCX3     | SNORD73B  | TMEM171   | GNAT1     | SLC1A7    | CD46     | LTBP2    | USP13      |
| PDLIM3   | NPTX2    | GPX2     | FGF14      | CATSPE3    | DYNC11    | SSPO      | ZNF648    | KERA      | ETV2     | FSTL4    | RF02104    |
| SLC13A4  | MINAR1   | LMCD1    | RNF17      | MYO15B     | ANGPTL1   | ZPBP2     | TNFRSF13C | GABRA6    | CAMK2N2  | C17orf64 | SMTNL1     |
| ECM2     | CCL20    | TBC1D30  | CCR9       | SAMD12     | CRYAB     | DPF3      | JMJD7     | TSHR      | DGKG     | LSAMP    | C1orf94    |
| ACTN3    | SPARCL1  | CACNA1S  | LRRC46     | HS6ST3     | TBKBP1    | OAS2      | ANO3      | SLC6A18   | DLX5     | TLL9     | SPATA32    |
| BPIFB4   | PCSK9    | B3GNT4   | CCDC87     | SVEP1      | C11orf86  | KCNK13    | 3-Sep     | HAPLN1    | STK10    | CLDN5    | SLC36A3    |
| PPARGC1A | RNF125   | CD200    | KCNB1      | MORN4      | RGS9BP    | EGR2      | CCDC68    | RGR       | RHOBTB3  | SLC27A2  | MUSK       |
| GABRD    | CATSPE4  | CCDC106  | STAC2      | AC139530.1 | CFAP57    | C21orf58  | LRRC19    | CLDN6     | BDKRB2   | GALNT9   | ZIC2       |
| LINGO1   | SHISA4   | DBN1     | ENPP4      | GLIPR1     | LGALS2    | SNCAIP    | WDR66     | CDH2      | GJB2     | PLIN1    | CTXN3      |
| SFTPC    | SYP      | MED12L   | FOLR2      | NBEA       | ASPG      | TMPRSS15  | CCR10     | PDE6C     | SHISA8   | MUC17    | RNU6-1234P |
| PCDHGB1  | GPR21    | KIAA2012 | TMEM88     | RF02271    | CD160     | AJAP1     | SNORA80E  | RBF3X3    | SPATA46  | AOC3     | KLRK1      |

|          |          |           |       |           |           |          |          |         |           |            |          |
|----------|----------|-----------|-------|-----------|-----------|----------|----------|---------|-----------|------------|----------|
| SYNGR4   | SLC1A6   | DNAJC6    | CNNM1 | SERPINF2  | HPSE2     | KLHL29   | C19orf81 | MSTN    | GCA       | SYT4       | MADCAM1  |
| CARMIL3  | NLRP6    | CAMK2N1   |       | TNFRSF13B | GSPT2     | MIP      | RNASE10  | TMEFF2  | FMOD      | TMEM217    | FHL2     |
| BRSK1    | SERPIND1 | NME5      |       | SERPINA9  | CACNG4    | FGF21    | MIR26B   | DUSP27  | ALOX15B   | HTR2C      | GGG1     |
| FABP4    | PRSS53   | CACNA1C   |       | ILDR1     | TIGD4     | MIR103A2 | NOXO1    | PTF1A   | ADGRF2    | HFM1       | CD37     |
| PPP1R3C  | SELENOV  | CYP8B1    |       | IQCD      | MYH1      | MMP11    | PTPN7    | GALNTL5 | DMRTB1    | UPK3B      | SLC10A6  |
| HCLS1    | ANAPC15  | WFDC5     |       | ZNF583    | ARMC12    | TAC3     | RFTN2    | AJM1    | HIST1H2AE | CRHR1      | SLC26A9  |
| PRCD     | PADI2    | SGSM1     |       | RYR3      | MKX       | CHRND    | C8G      | CDX2    |           | RNU6-1095P | SLPI     |
| CD37     | CORIN    | DOCK10    |       | APOM      | CCNB1P1   | SLC4A10  | CD53     | TMEM52B |           | ABCA8      | HIC1     |
| PPM1N    | OMD      | EBF4      |       | RNF150    | DNASE1L3  | ELFN2    | CD72     | NECAB2  |           | CMKLR1     | CCNO     |
| LRAT     | DIO2     | RPS12     |       | DNHD1     | TMEM37    | FOXH1    | ADGRE1   | HCRT2   |           | GPR18      | DCT      |
| CFAP77   | PAX5     | PTPN5     |       | PPP1R32   | PCDHGB5   | ASB4     | ZFP69    | RAG2    |           | MRAP       | ADAMTS12 |
| JAM2     | ANGPT2   | RECK      |       | ACYP2     | SYT11     | RIPOR2   | TFPI     | FSHR    |           | CLDND2     | STOML3   |
| IL23A    | RANGRF   | TNFAIP8L2 |       | KRT7      | KRT76     | MIOX     | AGBL2    | GPR101  |           | SCART1     | ASPHD1   |
| ASB14    | OR21P    | CYP4F3    |       | ZNF575    | S1PR4     | FMO1     | KCNT2    | MUC5AC  |           | RNU4-58P   | DZANK1   |
| TSPYL5   | KHDRBS3  | ITGB8     |       | CCBE1     | RIMS4     | GRIN1    | DCLK3    | 4-Mar   |           | RTP1       | P2RY13   |
| PIK3R5   | KCNF1    | MMP13     |       | KATNAL2   | FGG       | ICAM2    | TMPRSS6  | LRFN2   |           | C9orf24    | BTK      |
| OAS3     | ENPP4    | DOK5      |       | FBN2      | POU4F1    | RAB36    | KIF5A    | NEK10   |           | KCNA6      | TYR      |
| HPN      | OTUD6A   | GPR156    |       | IL2       | MIR150    | UBD      | TNNI3    | XKR7    |           | C10orf105  | MB       |
| GYPC     | SMIM38   | EHD3      |       | AREG      | TNNI2     | CHRDL1   | PTPN22   | OR5M8   |           | ACP7       | CHD5     |
| DENND3   | FIGN     | PPP1R3C   |       | M1AP      | SAT2      | TSPAN12  | ROPN1L   | RAB9B   |           | AC119396.1 | ABCA13   |
| CHADL    | IL17B    | FBN2      |       | MAN1A1    | MRLN      | WNK3     | TFR2     | PKHD1   |           | GPR176     | GRIN2C   |
| BTC      | SLC34A3  | LINGO3    |       | CD37      | MIR23A    | CLIC5    | CNR1     | OR5AU1  |           | TRH        | SOAT1    |
| SYT1     | CTSK     | KATNAL2   |       | CXCR4     | HIST1H2BM | LGR5     | SGPP2    | LINGO2  |           | CABP4      | NXPH1    |
| RFLNA    | STK32C   | PHKG1     |       | RNU6-431P | SNORD45A  | ADGRG7   | INTU     | OR9A4   |           | NMUR1      | SLC05A1  |
| SLC12A3  | SOX5     | ADAMTS6   |       | PLCXD2    | LRRC75A   | ANK2     | KYNU     | KCNA5   |           | SUN5       | KRT75    |
| SPNS3    | ASB5     | BMPER     |       | UCP3      | TSKS      | RF00026  | KRT8     | OR51G1  |           | NKX1-1     | KCNK1    |
| UBA7     | EYA1     | COL4A1    |       | SARDH     | TEKT5     | MYBPC1   | RNF223   | FAM19A4 |           | GABRA3     | SNORA5A  |
| PLCH1    | NEIL2    | GATA6     |       | COL23A1   | STMN2     | SNORD94  | LOXHD1   | P2RY6   |           | MC4R       | UPP1     |
| RUNX1    | BFSP1    | RF00604   |       | BHLHA15   | RAB26     | LOX      | CACNA1G  | ADRA1B  |           | CYP26C1    | TLR6     |
| GUCY1A2  | SNORD11B | HIST2H3D  |       | KCNQ5     | IFFO1     | DYSF     | HIST2H3D | SOX14   |           | BPIFB6     | CD3G     |
| KCND2    | PNMA8C   | MME       |       | PTH1R     | CROCC2    | FAM13C   | TERB1    | IRS4    |           | TIGIT      | PODN     |
| C1orf146 | GIPR     | TNFSF18   |       | IL41      | RAB33A    | SCARF1   | PCDHGB1  | OR1N2   |           | RAB17      | COL4A4   |

|               |               |              |  |              |                |                |                |              |  |              |                |
|---------------|---------------|--------------|--|--------------|----------------|----------------|----------------|--------------|--|--------------|----------------|
| SELP          | CHD5          | M1AP         |  | C19orf3<br>8 | BMP3           | EHD3           | CNFN           | PTAFR        |  | MYH10        | VSTM4          |
| MIR194-1      | MRO           | ZBTB46       |  | POSTN        | EPHX3          | CHRM4          | RYR2           | C8orf34      |  | FAM78<br>B   | SIDT1          |
| DEGS2         | RAB19         | KLHL13       |  | CACNA<br>1F  | SERPIN<br>C1   | FLT3           | SMYD1          | TMC2         |  | TNFSF1<br>2  | RAB36          |
| RN7SKP1<br>27 | ANO4          | HDC          |  | SNORD<br>17  | ZNF385<br>C    | MYRIP          | CHIC1          | TEX33        |  | EXOC3L<br>4  | CNR1           |
| TMEM23<br>2   | SYN1          | NLGN1        |  | FRMD3        | EN1            | LEP            | RGS14          | CHRNA10      |  | ADAP1        | SLC46A<br>2    |
| FAM81B        | FRMD5         | SRGN         |  | HIPK4        | SLC38A<br>3    | ASCL1          | CLHC1          | LGI1         |  | GNAZ         | MYH7           |
| SHISAL1       | ANK1          | CPA2         |  | NFE2L3       | TNNT1          | CDH10          | BTN1A1         | OR11         |  | SULT6B<br>1  | IHH            |
| AKAP3         | UNC80         | NRCAM        |  | DACT1        | ABLIM2         | ANGPTL<br>8    | DOCK10         | CRYGB        |  | BLK          | C16orf8<br>6   |
| PLCXD3        | MIR339        | SLC35D<br>3  |  | PABPC4<br>L  | ELOVL2         | RNU6-<br>1204P | NCCRP1         | OR51A7       |  | SPATA2<br>1  | GCM2           |
| C2orf73       | C20orf1<br>73 | LIPH         |  | PKHD1L<br>1  | ADM            | PTX4           | F8             | OR51F2       |  | BFSP1        | C1QTNF<br>2    |
| IL19          | MYOM<br>2     | C17orf9<br>7 |  | HPCA         | LST1           | OR4A47         | FAM20A         | NAP1L2       |  | KCNH1        | AIF1           |
| C6orf201      | PHYHD<br>1    | ARHGA<br>P9  |  | TMEM2<br>71  | ANXA3          | CREG2          | C1orf146       | MIR1251      |  | SLC27A<br>6  | AC0084<br>03.1 |
| PHYHIPL       | SNORD<br>62A  | ELMOD<br>1   |  | LRRC36       | MAPT           | ETNK2          | PRKG1          | ANKRD66      |  | MMP19        | KRT71          |
| KLHDC7A       | C19orf8<br>5  | LHFPL5       |  | STPG2        | PSPN           | TAC4           | MRV11          | PRPH2        |  | RENBP        | CORT           |
| SRD5A2        | KLK12         | TCTEX1<br>D4 |  | OPN3         | ETNPPL         | THEMIS<br>2    | FAM174<br>B    | FCRLB        |  | PLEKHA<br>4  | KRTAP1<br>1-1  |
| HIST1H2B<br>E | PLVAP         | RADIL        |  | SEMA4<br>F   | CCL28          | LRRTM<br>1     | CALR3          | SIDT1        |  | DOCK2        | PRR22          |
| C20orf20<br>4 | WFDC2         | EYA2         |  | KIRREL3      | PDPN           | CAPN12         | LY6G6F         | FEZF1        |  | PIGR         | CRABP1         |
| RBP4          | RNU6-<br>384P | ANKS6        |  | C1orf14<br>6 | GHRL           | CD248          | KISS1R         | PRDM5        |  | DUOX2        | SLC38A<br>5    |
| CCDC196       | EPHX4         | NCMAP        |  | ZNF697       | RAB3B          | CCL5           | NUP210L        | FBXO43       |  | PRSS35       | RHOH           |
| GCM1          | DCLK1         | DCLK1        |  | TMEM1<br>08  | PTPRT          | HCN3           | TMEM74<br>B    | HPSE2        |  | HMCN2        | OTOA           |
| NR2E3         | NHSL2         | SLC7A3       |  | S1PR1        | GASK1B         | ATP1B2         | SLAMF9         | SOX11        |  | HIPK4        | CYTH4          |
| AZGP1         | RBM24         | ACYP2        |  | ASTN1        | MKRN2<br>OS    | KRT82          | CDK14          | RASL12       |  | DNAJB7       | MYOM<br>2      |
| DLK1          | ADAM2<br>2    | FNDC1        |  | CDX2         | TRPM1          | SAXO1          | RWDD2A         | KCNS2        |  | ANK1         | SPAG8          |
| H1FOO         | HIST1H<br>2BG | CYP1A1       |  | DYRK4        | RNU6-<br>1280P | PCP4L1         | BVES           | PCDH8        |  | EBF1         | ADAM2<br>3     |
| UPK1B         | TSPAN1<br>2   | SHCBP1<br>L  |  | LIN28A       | EID2           | TNFRSF<br>11B  | IFITM5         | KSR2         |  | ATP2A3       | NRP2           |
| SHISA6        | NPB           | LBP          |  | CHN1         | MYH10          | B3GNT6         | GUCA1B         | NELL2        |  | DNAH1<br>1   | JAM3           |
| OAZ3          | SYT7          | IL27RA       |  | MIR345       | SYT1           | CYP26A<br>1    | THY1           | PPP1R14<br>D |  | CLDN15       | SLC26A<br>1    |
| PCDHGA1<br>2  | CCR9          | KCNK10       |  | GP5          | P2RX3          | B3GNT4         | C21orf62       | FRMPD4       |  | ZC4H2        | AC0935<br>25.2 |
| S100B         | NEURL<br>2    | DENND<br>3   |  | TBX4         | TMEM8<br>8B    | TTC36          | SPATA20        | OPRD1        |  | CACNA<br>2D3 | CPLX1          |
| DAGLA         | EDN2          | CTXND1       |  | GGT7         | CD19           | XK             | GDAP1L1        | SMARCA1      |  | FST          | HEPACA<br>M2   |
| FCER2         | ATP1B2        | FSTL1        |  | POU4F3       | SLC12A<br>8    | LRRC71         | AC00423<br>3.2 | CHP2         |  | PTPRM        | MPP3           |
| FAM13C        | SPRY3         | EMCN         |  | CFAP97<br>D1 | FMO2           | MGP            | GDPD3          | HECW1        |  | GPM6B        | RAC2           |
| KRT18         | SPACA1        | GNG3         |  | SAMD1<br>3   | PLA2G4<br>C    | RP1L1          | TMEM59<br>L    | SELP         |  | SLC18A<br>2  | GRM5           |

|          |          |         |  |            |          |           |            |            |  |           |            |
|----------|----------|---------|--|------------|----------|-----------|------------|------------|--|-----------|------------|
| PRRX2    | YPEL4    | SLIT3   |  | HNFB1      | RPS6KA2  | SCGN      | KCNA1      | ACP7       |  | NECTIN3   | SLC2A13    |
| HOXC4    | CDH22    | ANKDD1A |  | GJD2       | ABHD18   | PCDH10    | ADAMTS8    | SNPH       |  | SLC41A3   | ATP13A5    |
| PRR36    | GABBR2   | GPRC5A  |  | TBXA2R     | RCSD1    | OLFM4     | EFHD1      | KLRD1      |  | OTOF      | WFDC12     |
| GABRB1   | CP       | RAMP1   |  | BEAN1      | USP50    | CDH7      | TNFSF15    | AK9        |  | SPSB4     | CNGB1      |
| CACNA1C  | LARS2    | SPARCL1 |  | GNRH1      | HOXD3    | ASPHD2    | CATSPERZ   | RUNX1T1    |  | MIR7-1    | DOCK10     |
| HACD4    | CYSTM1   | ANK2    |  | GAST       | GUCY1A1  | ROBO3     | LTF        | PCSK1      |  | CES5A     | CCNJL      |
| OPRD1    | RFTN1    | PLIN4   |  | SLC10A2    | SLCO1C1  | DHRS7C    | PNMA2      | ST6GALNAC4 |  | SEMA3G    | CD248      |
| CCN2     | ISG15    | LANCL3  |  | HTR3A      | HPSE     | ZDHH22    | MRAP       | GABRA4     |  | OPN3      | ZEB1       |
| LTBP2    | FYB2     | ERG     |  | GPR26      | OR52B6   | SCN9A     | RN7SKP11   | NRXN3      |  | ANKRD40CL | ADAMTS19   |
| F2       | ZFP37    | CMKLR1  |  | TSBP1      | PLXNA4   | SNORA17B  | TMPRSS5    | RPL7A      |  | MSH5      | CCDC24     |
| ADORA1   | GGN      | CMPK2   |  | CLDN9      | NCKAP1L  | TNR       | GLDN       | ARHGAP15   |  | KIAA1324  | PLCB2      |
| ITGB1BP2 | CDC42EP2 | APOA2   |  | AC138647.1 | PRAF2    | MIR200A   | PIH1D2     | ASPHD1     |  | SNTG2     | RASGRP4    |
| TOX3     | ALPL     | C3orf52 |  | NLRP3      | PACRG    | NPPA      | PROCA1     | SLC6A16    |  | GPR183    | PEAR1      |
| DCDC2B   | GZMM     | ABAT    |  | FBXO16     | OPRL1    | SEMA6A    | HTR2A      | NXPE4      |  | RASAL1    | DOK5       |
| PKN1     | MME      | NT5E    |  | ICA1L      | ITGAX    | PCDHB6    | RIMKLB     | MYBPC3     |  | SLC23A3   | SAPCD1     |
| DIPK1C   | ARMCX4   | DOC2B   |  | SPRY4      | SPRR4    | SMPD3     | TRIM17     | SP8        |  | HSH2D     | TCAP       |
| CADM3    | OBSCN    | SCARF1  |  | IGSF9B     | DCLK2    | GRIN3B    | TRPM6      | HSD17B14   |  | RPL7A     | IMPG2      |
| LHFPL6   | PDZK1    | PEG3    |  | CD200      | MYBPC1   | C19orf85  | METTL21C   | WDR86      |  | ZNF583    | SOD3       |
| DPYSL5   | CFAP69   | ADCY1   |  | NPC1L1     | TMEM51   | NPAS3     | PRTN3      | TNFRSF13C  |  | TENM3     | KCNMA1     |
| BEND4    | SNORA2C  | MMP11   |  | FKBP14     | CCDC87   | RBM11     | STYK1      | FAM237B    |  | OAS2      | NHLH1      |
| CEP295NL | CFAP100  | TRPM2   |  | NAP1L3     | RTBDN    | ROBO4     | PTPRC      | ST6GALNAC5 |  | CCT6B     | HCAR1      |
| SLC25A43 | WFDC5    | MRGPRE  |  | PRDM1      | GRM7     | RNU6-929P | CMA1       | BICD1      |  | FGF1      | RNU6-1044P |
| LYVE1    | ZNF648   | CLDN8   |  | SPATS2L    | ANKRD34A | TEX52     | C4orf48    | MSLNL      |  | CCDC106   | SNORA53    |
| PRKAR1B  | LYZL4    | DMTN    |  | ARHGAP44   | DPYS     | IL2RB     | NPS        | DLX6       |  | CAPN8     | TRIM46     |
| HSD17B8  | MIR200A  | TRPC4   |  | TSPAN12    | DGKI     | CLEC14A   | ZFP57      | EPHA10     |  | CNIH3     | PNCK       |
| TMPRSS9  | MUSK     | CYP27A1 |  | BHLHE22    | COX7A1   | SHANK3    | PWWP3B     | LTA        |  | RSPH4A    | SFRP2      |
| C17orf97 | HS3ST2   | ABI3BP  |  | GRM1       | GCK      | PRAM1     | ST6GALNAC4 | VEGFC      |  | EML1      | KRT27      |
| MAGIX    | NCF1     | NHSL2   |  | MAOB       | SATB2    | C1orf54   | CRACR2A    | ALPK2      |  | SERTM2    | KCNN4      |
| RIPOR2   | AGBL2    | COL5A2  |  | GATA6      | TMEM198  | SDR42E2   | KHDRBS3    | ZSWIM5     |  | PTPRU     | TNFSF13B   |
| STRIP2   | HIC1     | C1QTNF6 |  | PTHLH      | MS4A10   | SLC30A8   | SLC25A18   | CCKAR      |  | STKLD1    | LY6H       |
| PLA2G4B  | ACAP1    | SLC1A2  |  | SLC43A2    | CELF4    | HDC       | CD101      | ALK        |  | AIPL1     | MYH15      |
| RAB36    | AIF1L    | FEZ1    |  | ZNF77      | NHLRC4   | NKD2      | SHC3       | TMEM171    |  | SULT4A1   | ZNF831     |
| CYP27B1  | OCA2     | FBXL16  |  | KRT23      | DDR2     | PTPRQ     | CASC1      | MAP3K15    |  | COL6A3    | SPACA4     |

|            |          |           |  |            |            |           |            |          |  |         |           |
|------------|----------|-----------|--|------------|------------|-----------|------------|----------|--|---------|-----------|
| MAPK15     | RARB     | CATSPE R3 |  | SOX9       | FKBP6      | NAPSA     | EMX2       | HEPACAM  |  | MROH8   | CASS4     |
| CAPN6      | CADM4    | ZNF365    |  | SEMA3E     | AMBP       | ZDBF2     | CNTFR      | RAB39A   |  | SLC35D3 | HAPLN4    |
| CRYBA4     | RGS16    | HSD17B13  |  | LRAT       | RGS9       | NTN1      | IFFO1      | KCNQ5    |  | CMYA5   | BTBD16    |
| SLC6A13    | ABCA4    | B3GNT7    |  | OLFML2A    | ACKR1      | BASP1     | SLC28A3    | C1QL1    |  | FNDC7   | PROKR2    |
| GUCY1A1    | CTHRC1   | CD27      |  | PRR5       | AKAP12     | CGREF1    | LIPH       | OAS2     |  | PIP5KL1 | A2M       |
| COL25A1    | FAM83E   | FBXO16    |  | ALPK3      | DNAI2      | KANK4     | PTPRD      | EGR2     |  | SPATA20 | CYS1      |
| SLC9B2     | GMFG     | TTC9      |  | TLR3       | DAB1       | NID1      | ADAM11     | C17orf64 |  | CASKIN1 | NPAS4     |
| DMBX1      | NEK11    | RNY3      |  | EGR4       | NEXN       | ZBTB32    | GPR141     | CD8A     |  | TRIQQ   | ELAVL4    |
| ZMAT1      | PCDHGA5  | DENND2A   |  | LPAR3      | SNORD98    | CLDN2     | SLC38A1    | SPOCK1   |  | SOSTDC1 | UBQLNL    |
| CD72       | TMPRS S6 | TBX1      |  | WNT11      | FAM89B     | SLFN5     | NIM1K      | AJAP1    |  | SPATA33 | SKOR2     |
| SAG        | PIK3AP1  | DNAI2     |  | ACTN3      | ABCG4      | TOMM20L   | GRID2IP    | TMPRSS6  |  | FES     | MIR708    |
| BRMS1      | GRID2IP  | PLIN1     |  | NEURL3     | LRRC26     | ADGRF5    | PTPRT      | DSG4     |  | COL8A1  | PRMT8     |
| HDC        | DNALI1   | TREX2     |  | FNDC1      | CGREF1     | AEBP1     | MED12L     | BCAS1    |  | FER1L6  | SLC5A2    |
| EDNRB      | FGF14    | CFAP77    |  | RF01976    | BMP4       | EQTN      | LRP8       | MMEL1    |  | GFRA2   | SLC24A1   |
| TSNAXIP1   | IZUMO1   | STMN2     |  | AC020613.1 | CD84       | CRTAM     | LCK        | CD40     |  | PDLIM4  | NR5A1     |
| HES7       | PCDHGB2  | UBA7      |  | MAP3K21    | CPNE4      | SELPLG    | GPR22      | UTS2     |  | SLIRP   | FAM71D    |
| TRABD2B    | PLAGL1   | AP3B2     |  | ADGRL2     |            | NECTIN3   | PCLO       | C1QA     |  | IQCA1   | FEZF1     |
| DIPK1B     | ZNF593   | SIGLEC1   |  | HMCN1      | SLC1A3     |           | CBFA2T3    | EBI3     |  | ASTN2   | TEX45     |
| AKAP6      | GAL3ST3  | MUC17     |  | TGM2       | AOC3       | KIRREL2   | FOSL1      | GAD1     |  | PODXL2  | FBXO43    |
| DLEC1      | HIST1H1B | CHST13    |  | SMOC1      | C21orf62   | ADAMT S13 | AC139530.1 | MYRF     |  | PRRX1   | HPSE2     |
| FAM149A    | CD164L2  | RUNX2     |  | NUDT15     | CEP295NL   | TNFRSF13B | TMEM25     | THEGL    |  | MIR193B | CCDC146   |
| C11orf91   | LRRC24   | FGF1      |  | AC073111.5 | ALOX15     | ASB15     | GASK1A     | ASIC2    |  | IQCH    | TBX4      |
| C16orf96   | ATP13A5  | RTN4RL1   |  | GEM        | ADARB2     | PAPPA2    | RNU6-1044P | PLLP     |  | GRID2IP | CEND1     |
| SLC41A3    | TMEM179  | SNORD42B  |  | TOX3       | GRIP2      | STKLD1    | KPRP       | NKAIN3   |  | CHST2   | ACTG2     |
| RBPMS      | SHANK2   | PCDHGB2   |  | SUSD3      | NGF        | OTOF      | NKG7       | GPR88    |  | KRT12   | KIAA0319  |
| CORO1A     | MGP      | TENM3     |  | AMOT       | C17orf64   | CCDC190   | TRIM66     | DPEP3    |  | SYNE3   | RP1       |
| TMEM255A   | AMHD1    | APC2      |  | DAB2       | RASGEF1A   | FAM155B   | CCDC69     | SHOX2    |  | GCNT7   | UBE2U     |
| PROZ       | ELAVL2   | C2orf88   |  | FSD1L      | INSYN2     | NAV3      | TEX54      | FGF21    |  | PECAM1  | MC2R      |
| NCAM1      | S1PR4    | DAGLA     |  | PDE5A      | SCN4B      | SPACA3    | KBTBD13    | FBXO15   |  | STAP1   | RNU6-120P |
| AC011529.1 | IQCG     | DNAH2     |  | CFAP69     | SLC51A     | SIX6      | PLEKHA4    | SLC15A5  |  | KCNA1   | PRRT1B    |
| CMTM3      | HSD17B2  | TNFSF12   |  | FBLIM1     | MAJIN      | CRHBP     | SNORA58B   | RNU12    |  | PJKV    | NOL4      |
| TAGLN      | UBD      | GPRCSB    |  | STARD8     | HEATR9     | GALR1     | CMYA5      | NPAS4    |  | ITGA1   | SYCP2     |
| TGM7       | ADCY4    | ADAMT S5  |  | COL14A1    | AC118754.1 | SCGB1A1   | CX3CR1     | TBX4     |  | SSPN    | KIF19     |
| TBC1D9     | KCNIP3   | COL5A3    |  | RHBDL1     | GAD1       | PLAC8     | CD7        | SEZ6L    |  | SIAH3   | CPB1      |

|           |          |           |  |         |         |           |         |            |  |            |           |
|-----------|----------|-----------|--|---------|---------|-----------|---------|------------|--|------------|-----------|
| TUBB4A    | HSPA12B  | CDH11     |  | FZD7    | DEPDC1  | ZSWIM2    | RUNX3   | SPOCD1     |  | NWD2       | VTN       |
| GPR183    | STAP1    | B4GALNT2  |  | TMEM63C | IGFBP3  | CLDN14    | GRM7    | POU4F1     |  | AC011529.1 | PRG3      |
| SERPINF2  | HSD11B1  | GRM1      |  | GRIN2B  | HYKK    | OR8S1     | MIR193B | DPP6       |  | GUCY1A2    | TMPRSS5   |
| C19orf67  | TNFSF10  | TGM5      |  | REP15   | FGL1    | SCGB3A1   | PLCXD3  | NOXO1      |  | CD27       | GPR45     |
| KIAA1324L | RNF128   | RBP4      |  | AK7     | RPRML   | WFDC2     | PHYHIPL | WSCD2      |  | CAPN6      | TLR1      |
| CYP27A1   | GFR4     | MN1       |  | GRIK1   | FIGN    | SULF1     | ADAM12  | RRAGB      |  | INHBA      | MOGAT2    |
| LRRC27    | SDCBP2   | LTA       |  | ACE     | DENND2A | FBXW10    | UBASH3A | AKAP6      |  | KLHL13     | TRIM38    |
| ENPP5     | KSR2     | EPHX4     |  | KCNJ10  | KCNT1   | LINGO3    | SCAMP4  | OLFML2B    |  | FAM13C     | VXN       |
| DNAH2     | SNORA14B | SPRY4     |  | SLC24A4 | ITLN1   | GDF11     | CAGE1   | HRNR       |  | ILK        | SOX2      |
| DNHD1     | PKP2     | RNU6-622P |  | TNFSF10 | SLC5A5  | CDHR1     | DMBT1   | CD86       |  | RAI2       | RN7SKP204 |
| ADAMTSL3  | PRKCQ    | LRRC34    |  | CLIP3   | TSPAN33 | AIPL1     | SCN3A   | RIPOR2     |  | CFAP77     | TMEM200C  |
| MSI1      | HEATR9   | RNF222    |  | NPR2    | SH2D4B  | C20orf173 | PPP1R27 | INSYN1     |  | PLA2G4C    | CALY      |
| WFIKK2    | BCHE     | SNORA58B  |  | NDP     | CD38    | COMM5     | ZFPM2   | AC021072.1 |  | COL11A2    | SEMA6D    |
| EGFLAM    | KRT26    | COLEC11   |  | LHFPL2  | SHANK3  | CD38      | MYO1F   | GRIN1      |  | RGL1       | LBX2      |
| GGT5      | ATP6V1B1 | SMPD3     |  | ATP10A  | QRICH2  | FFAR2     | ATP1A2  | HGFAC      |  | HEATR4     | FLT4      |
| TAL2      | EAF2     | CGNL1     |  | CLEC3B  | IFIT2   | RASGRF2   | KDM5D   | EBF1       |  | SKAP1      | TSKS      |
| BIN2      | DNAH11   | ZC3H12D   |  | BTN3A1  | FGF16   | ACYP2     | LAPTM5  | KCND2      |  | SYTL3      | DKKL1     |
| ODF3L1    | TSPAN33  | GSPT2     |  | ISL1    | MT-ND3  | NEFH      | FKBP14  | CLIC5      |  | FBXL13     | IGF2BP2   |
| OPN3      | KLHL32   | CCDC89    |  | ZNF365  | KLHDC9  | KATNAL2   | MMP21   | CD36       |  | VSNL1      | FAM155A   |
| TMEM25    | GCHFR    | MYH11     |  | SPINK6  | LRG1    | ASIC3     | CTSK    | CSRNP3     |  | RF00602    | LINGO4    |
| GNG5      | LAMA4    | ARID3B    |  | CHRM4   | SLC18A3 | GUCY1A1   | GPR6    | ADGRL3     |  | PCDHGB2    | EDAR      |
| C19orf57  | MIR365A  | RHPN1     |  | FOXC1   | C3orf18 | OTOG      | ZIC3    | KRT9       |  | DNAJC12    | PP2D1     |
| ABCD1     | MECOM    | MTFP1     |  | IRX1    | SLC17A9 | RXRG      | ICA1L   | SLC10A1    |  | SULF2      | RIPOR2    |
| AGR2      | DOCK10   | SPAG8     |  | COL5A2  | MAP9    | ANKRD1    | ZNF618  | CPXM1      |  | STRA6      | PRCD      |
| DNAI1     | RIBC2    | CSRP2     |  | INHBB   | NPR3    | CHRNA6    | ADRA1D  | RUNX2      |  | FBXL2      | OGN       |
| CHRNA3    | CACNA11  | SSC5D     |  | SNORA2C | ST18    | SLC6A5    | FEZF2   | IL16       |  | VSIG8      | Z98752.3  |
| CAPN12    | HOXD1    | DNAH10    |  | SHCBP1L | LSP1    | GPR119    | LY6H    | ADAMTSL1   |  | ZIC5       | EPHX4     |
| RNF152    | PLEKHG1  | CCDC69    |  | RGS20   | SLC16A3 | GJD2      | LIN7A   | NDP        |  | FMNL1      | CD40      |
| PPEF2     | NYX      | ARG1      |  | PLIN4   | TSSK1B  | COLCA2    | ALOX15B | LDB3       |  | NEURL1     | CYTIP     |
| RAB2B     | CDH5     | NRIP3     |  | OTOP3   | CCDC73  | RNU6-931P | KRT35   | KRT19      |  | EFHB       | OBSCN     |
| PRSS35    | CTSS     | TRIM9     |  | FBXO27  | SP6     | PPARG     | RORB    | HSPA12B    |  | RELN       | AGR3      |
| SCARF2    | C11orf65 | BMP6      |  | LG13    | MIPOL1  | KCNQ1     | LARS2   | KIAA1324L  |  | CD5        | FBN2      |
| CAMK2N2   | MMP13    | EPB41L2   |  | KRT80   | S100G   | RNF112    | COL3A1  | IGF2BP1    |  | MYO1H      | ENPP6     |



|            |            |           |  |           |         |           |          |          |  |          |          |
|------------|------------|-----------|--|-----------|---------|-----------|----------|----------|--|----------|----------|
| C18orf54   | TIMP1      | ALDH3B1   |  | PDLIM3    | SPTBN4  | ARAP3     | AKAP5    | RASGRP4  |  | INHBB    | BRINP3   |
| CCDC33     | ACSBG2     | LRFN3     |  | ODF3B     | PAX8    | TNFSF11   | SERPINA5 | EREG     |  | EHF      | FAM89B   |
| DBN1       | NUGGC      | SNORD63   |  | ABI3BP    | SULF1   | CFAP70    | MIR221   | MFAP2    |  | HIST2H4A | LBP      |
| CUX2       | RTL9       | MYL9      |  | ARMCX6    | PDZD3   | PLVAP     | THRSP    | TEX49    |  | AQP3     | NOXO1    |
| A3GALT2    | GPR25      | NRXN1     |  | FGF22     | SLC4A5  | HSPB9     | HPSE     | RNY3     |  | CACNA1G  | IL31RA   |
| SERPINC1   | CD83       | SERPINA12 |  | CHADL     | AMHR2   | PECAM1    |          | HMCN1    |  | FKBP10   | CXorf21  |
| FAM19A5    | CCDC87     | JAM2      |  | HRASLS    | KLK13   | NNMT      |          | KLK13    |  | SACS     | ARG1     |
| CASC1      | TRIM66     | PTPRM     |  | HTR1B     | NCAM1   | MAP3K19   |          | SOX10    |  | LCA5     | PTPRN    |
| PSORS1C2   | SCUBE1     | STRA6     |  | PDF       | IGFBP2  | DES       |          | DYNC111  |  | KCNH5    | PHKG1    |
| DACH1      | IL1RAPL1   | FAXC      |  | KIRREL1   | MROH6   | FSTL5     |          | CHST2    |  | TOMM6    | RRAGB    |
| ANKRD33B   | RIMS3      | EDN1      |  | TNFRSF11B | GPR137C | SPATC1    |          | ADCY1    |  | ARHGEF40 | FSTL1    |
| C3orf18    | AC021072.1 | NPTX1     |  | ARHGA28   | SLC30A2 | RNU6-622P |          | TMCC2    |  | VPS25    | ITGAE    |
| KLHL3      | GNGT2      | PLPP1     |  | PDGFRA    | ZFXH3   | CD5L      |          | RNF180   |  | TBXAS1   | CCDC89   |
| LMCD1      | TECTA      | ULK4      |  | NTRK2     | FAM19A5 | ECE2      |          | APOLD1   |  | ARHGEF2  | SLC34A2  |
| MMRN2      | CLDN15     | IMPG2     |  | NEXMIF    | SH3TC1  | MIR98     |          | LIPN     |  | STPG3    | SNORD62A |
| SMIM1      | HIST1H2BD  | TET1      |  | LIPC      | CNNM1   | OR52W1    |          | SLC4A5   |  | SNCG     | NCF2     |
| SCNN1G     | PCNX2      | DLX6      |  | FGF1      | LCP2    | PCDHA1    |          | NPPC     |  | LPAR3    | CNN1     |
| RNU6-1299P | B4GALT6    | HIST1H4L  |  | TMEM238L  | PTPRD   | DPEP2NB   |          | IYD      |  | EGFL7    | F8       |
| PLEKHG4    | AC005551.1 | MYO15B    |  | CH25H     | C1QA    | NMBR      |          | SPTBN4   |  | SBK3     | CRACR2A  |
| FAM217B    | C4orf48    | KCNS1     |  | SYNE4     | SLC1A6  | FOXI3     |          | PCP4L1   |  | FAM186B  | FREM3    |
| PTPN18     | LCK        | KRT79     |  | ADAM22    | SLC2A13 | NTSR2     |          | SERPINA9 |  | SNORD35A | TRIB2    |
| GRAMD1B    | CACNB2     | CCL2      |  | SSTR4     | TNNC1   | TGM2      |          | CASQ2    |  | PTGDR    | RHAG     |
| CIITA      | SLC5A8     | OPRD1     |  | FAM171B   | MLPH    | RND1      |          | AANAT    |  | RTN4R    | ROR2     |
| CSRP2      | ZNF449     | ETV2      |  | LHX2      | TMEM100 | NCAM1     |          | IL2      |  | TGIF2    | FOXF1    |
| ARHGEF25   | AQP5       | KRT18     |  | SLIT3     | CASKIN1 | SBK3      |          | ROPN1L   |  | DCST2    | GPR151   |
| DMTN       | DUSP13     | PECAM1    |  | CD7       | SLC7A11 | PI15      |          | ST8SIA3  |  | GABRB1   | MEF2B    |
| LAT2       | PTPRN2     | SETBP1    |  | TSPAN13   | ARHGA22 | SCN4B     |          | GPR149   |  | PDE7B    | CFAP299  |
| GNPNAT1    | SERPINI1   | KLHL41    |  | CPT1C     | RNF180  | SLIRP     |          | GABRA5   |  | PIK3AP1  | CYP27B1  |
| CDH23      | OPN15W     | DNAH9     |  | SGMS2     | CELF2   | FAM83A    |          | HDC      |  | FNDC4    | SCHIP1   |
| LHX2       | SHISA8     | FAM13C    |  | NANP      | LTA     | PRR22     |          | PTGDR    |  | FGFR1    | TNFRSF1B |
| INVS       | LOXL3      | AVPR1A    |  | SLC35G2   | CALR3   | KLHL6     |          | USP44    |  | BGN      | ZFP57    |
| HEATR4     | EFHD1      | FADS2     |  | FER1L5    | AKNA    | NPHS1     |          | LUM      |  | ZNF593   | TLR9     |
| PLA2G3     | TNFRSF11A  | TSPAN33   |  | C18orf25  | RIPOR2  | IL13RA2   |          | ZNF582   |  | HTR2B    | HRNR     |

|                |              |               |  |              |              |                        |  |                |              |               |
|----------------|--------------|---------------|--|--------------|--------------|------------------------|--|----------------|--------------|---------------|
| APOLD1         | BMP3         | GFAP          |  | TRPM6        | TMEM2<br>69  | NPTX2                  |  | SHOC1          | AADACL<br>3  | KCNS1         |
| POU4F1         | RAD51<br>AP2 | KRTAP1<br>1-1 |  | FND4         | LAMA4        | WNT11                  |  | CYP27A1        | ADGRE<br>1   | C19orf7<br>1  |
| RPS6KL1        | PCP4L1       | MYOM<br>2     |  | GNG3         | CACNA<br>1A  | CARMIL<br>2            |  | RAB3IL1        | KRT7         | RNU6-<br>750P |
| AMIGO2         | CFAP12<br>6  | PRUNE<br>2    |  | PTGER4       | SPSB4        | FND1                   |  | EPST1          | TRAF3IP<br>3 | GFRA3         |
| ARC            | SYTL2        | CD93          |  | FXD6         | ANKRD<br>53  | RARB                   |  | SPATA21        | SPINK2       | ADGRG<br>3    |
| COL27A1        | DNAH3        | GPRC5C        |  | ARHGEF<br>17 | FOXF2        | SIX2                   |  | SALL1          | GSAP         | TMPRSS<br>11A |
| FSTL1          | TSGA10       | EVL           |  | AGAP2        | RNF32        | MYLK                   |  | ADCY10         | SAT2         | SLC44A<br>3   |
| PLAG1          | PRKAG<br>3   | RARRES<br>2   |  | TNF          | ASIC2        | HCST                   |  | TMC3           | PCDHG<br>A2  | FOXS1         |
| RALGPS1        | MYRIP        | PRKAR1<br>B   |  | MARK1        | GPR68        | PLXNC1                 |  | LPL            | AGER         | ARHGA<br>P30  |
| SPIN4          | GRIN3B       | TMEM1<br>51A  |  | CCL7         | BRSK2        | GLI1                   |  | RBPM52         | RILPL2       | TRIM67        |
| CYGB           | FOXC2        | RNF144<br>A   |  | ZNF853       | FOXS1        | CASKIN<br>1            |  | CD19           | PRR16        | AQP5          |
| NPR2           | C7orf31      | STAB2         |  | EMILIN<br>3  | PRR15L       | FAM3B                  |  | BASP1          | GRAP2        | EPOR          |
| MRVI1          | CLDN23       | VCAN          |  | AEBP1        | QPCT         | ETNPPL                 |  | C19orf81       | AK5          | EPHA10        |
| SELENOM        | AK7          | CLVS1         |  | LAMA2        | KCNE4        | CHADL                  |  | EPHA6          | KLHL3        | PHLDA1        |
| COL4A1         | ANKDD<br>1A  | SELENO<br>M   |  | CRYBA4       | S100A8       | TEX47                  |  | LY9            | TMEM2<br>6   | KCNH4         |
| CHIC1          | SRPX         | CHODL         |  | PIK3CG       | CMPK2        | CA3                    |  | SIM1           | GPRIN3       | KCNJ9         |
| SLC18A2        | ARMH1        | FERMT<br>2    |  | GIMAP5       | NCF2         | TTN                    |  | RAG1           | P2RX7        | MILR1         |
| MAK            | ITGA1        | MEF2B         |  | MSRB3        | PKDCC        | HEYL                   |  | ALLC           | ANKRD<br>53  | GPR173        |
| RUNX2          | SNORD<br>71  | KRT17         |  | MYBPC<br>2   | TUBB4A       | PCARE                  |  | CHGB           | PYGM         | ADGRA<br>2    |
| ZC4H2          | STX1A        | COL4A2        |  | NES          | GPM6A        | TCTEX1<br>D4           |  | CDH10          | SPOCD1       | RNF17         |
| RAB33A         | IL10RA       | C19orf6<br>6  |  | INTU         | RHOC         | PIP5KL1                |  | RNF186         | HSF5         | GSPT2         |
| TCHHL1         | GHRL         | ENPP5         |  | PEG3         | C10orf9<br>5 | SST                    |  | RNA5SP1<br>94  | ZNF189       | DLEC1         |
| CYP8B1         | CAPN3        | AGXT          |  | SLC10A<br>1  | MGARP        | SNAI3                  |  | HIST1H2B<br>E  | TLE6         | HACD1         |
| COMMD5         | GAREM<br>2   | VAMP5         |  | KIF26B       | PRIMA1       | ST6GAL<br>NAC1         |  | TEX22          | SLC7A8       | CLSTN3        |
| THSD1          | PGM5         | HEATR4        |  | RGS4         | DPF3         | GIP                    |  | CALCOCO<br>2   | MSH4         | SUSD4         |
| ZNF879         | CAMK4        | GDAP1L<br>1   |  | SMPDL<br>3B  | TTC25        | IL10                   |  | DNAH12         | SLC12A<br>5  | FADS3         |
| PCDHGA9        | DMBT1        | EFCAB5        |  | P4HTM        | NOXO1        | PMFBP<br>1             |  | C12orf42       | C1QA         | TEX14         |
| SLFNL1         | TRPC4        | MSRB3         |  | PPP1R3<br>C  | MLKL         | CDH16                  |  | MTNR1B         | CDH15        | PIK3R5        |
| ZKSCAN2        | TSGA13       | SYT1          |  | CPA2         | TTC7B        | TPSG1                  |  | MIR15A         | GALR3        | EAF2          |
| AC13864<br>7.1 | IL5          | USP43         |  | EFEMP2       | LRRC46       | LRIT2                  |  | RNU6-<br>842P  | GLIS1        | GRIN3A        |
| KLHDC9         | PRSS27       | FLNC          |  | ZAP70        | ALDOA        | RNU6-<br>105P          |  | AC11939<br>6.1 | CUL9         | SLC26A<br>8   |
| PPFIA4         | RBM20        | DLG4          |  | PIEZO2       | CARMIL<br>2  | ERICH6<br>RN7SKP<br>13 |  | ANGPT4         | NES          | TNN           |
| MYLK3          | RILP         | RAB37         |  | RAB39A       | ITGB7        |                        |  | GRIN2B         | NFASC        | PFN4          |
| ADAMTSL<br>1   | MFNG         | KRT77         |  | SYT2         | SLC4A4       | GRASP                  |  | SLC4A4         | ADGRF5       | CUBN          |

|           |           |             |  |             |    |           |  |         |  |            |           |
|-----------|-----------|-------------|--|-------------|----|-----------|--|---------|--|------------|-----------|
| COL4A2    | DPP10     | C9          |  | LIN7B       | F2 | ENO2      |  | ECM2    |  | GPR63      | HLA-DOB   |
| QRFP      | ARHGA P15 | ST6GAL NAC2 |  | RAB19       |    | PRR15L    |  | OXTR    |  | DNAH3      | RUNX3     |
| ATP7B     | TMEM8 8B  | LIPN        |  | ARTN        |    | SLIT1     |  | KCNC4   |  | KALRN      | OSBPL10   |
| BST1      | WDR49     | RF0060 2    |  | C2CD4C      |    | ANKS6     |  | PARVG   |  | MEIOC      | SLC6A17   |
| ERFE      | PTH2      | HNFB1       |  | GPX2        |    | ANKRD 33B |  | MYOC    |  | C2orf74    | FAM161B   |
| GADL1     | ZNF287    | ARHGA P44   |  | PTGDR       |    | TSNAXI P1 |  | PCLO    |  | ALX4       | TREX2     |
| SHC3      | TEX45     | CD72        |  | TP53TG 5    |    | MCTP1     |  | SLC38A4 |  | CLEC7A     | HCN2      |
| NUP210L   | SGCG      | OLFML2 B    |  | FLRT2       |    | TMOD2     |  | FSD2    |  | RNU6-1304P | FOXF2     |
| USHBP1    | CMYA5     | SVOPL       |  | LRRC24      |    | GJD3      |  | STX19   |  | IL10       | SNORD 42B |
| KRTAP16-1 | TMEM2 29B | TIMP2       |  | ESYT3       |    | DUSP4     |  | CPNE9   |  | PDCD1L G2  | ESPNL     |
| LDLRAD1   | AADAC L3  | PRSS35      |  | FBLN5       |    | LGI3      |  | CA7     |  | CPSF4L     | CCDC159   |
| PPP4R4    |           | LGI3        |  | ST8SIA4     |    | PRCD      |  | RUNX1   |  | ENPP2      | DHRS9     |
| PYGM      |           | KCTD11      |  | ISL2        |    | AMPD1     |  | ADGRB1  |  | SNORD 17   | IL1B      |
| TMEM240   |           | FOXS1       |  | EVL         |    | ARTN      |  | TCFL5   |  | PDE6B      | TMEM173   |
| TGM5      |           | CXCL9       |  | NTRK3       |    | SLC26A 8  |  | PCSK5   |  | NIPAL1     | LTB       |
| CHRM1     |           | TMEM2 62    |  | AMN         |    | TMEM8 8B  |  | RYR2    |  | CCBE1      | WNT9A     |
| NLRP3     |           | IL19        |  | GPR173      |    | OAS3      |  | SLC14A2 |  | PPP1R3 D   | RF02160   |
| PCSK1     |           | KCNC2       |  | CFAP74      |    | PDF       |  | MYOZ1   |  | GHRL       | CLEC4A    |
| ZNF239    |           | KLHL3       |  | JPH3        |    | SHISA2    |  | HOXD10  |  | LURAP1 L   | CTSW      |
| JAZF1     |           | PRR18       |  | CGNL1       |    | PHKG1     |  | SULF1   |  | FKBP1B     | NKAIN1    |
| CAMK2N 1  |           | ADAMT S7    |  | CXCL9       |    | LIPC      |  | FAM131C |  | ANXA9      | DND1      |
| AFF2      |           | CHRM5       |  | PHLDA1      |    | KIF17     |  | WFDC2   |  | CCDC30     | C2CD4D    |
| WDR66     |           | BEAN1       |  | TIE1        |    | PRRT3     |  | GJC1    |  | DLX1       | CPQ       |
| NEU2      |           | CNTF        |  | AC0115 29.1 |    | SLIT3     |  | CNN1    |  | ATP6V1 C2  | CITED1    |
| ANKHD1    |           | NANP        |  | STK36       |    | SH3RF3    |  | GPAT3   |  | XK         | ADAD2     |
| MROH8     |           | MIR106 B    |  | WNT1        |    | PP2D1     |  | FAT4    |  | TRAF1      | PTPRC     |
| ARHGAP4 4 |           | BLNK        |  | HIST1H 4B   |    | BAIAP2 L2 |  | C3orf80 |  | C17orf9 8  | S100Z     |
| SLC2A13   |           | RHOC        |  | APOD        |    | CCNA1     |  | MEST    |  | SPX        | RNU4-89P  |
| HSPB2     |           | EGR2        |  | SOSTDC 1    |    | AWAT1     |  | PRDM1   |  | ARHGA P6   | LRRD1     |
| ELN       |           | ECM2        |  | SELENO P    |    | PRRT1B    |  | CCN2    |  | RIBC1      | CAPN11    |
| GULP1     |           | SPON1       |  | EGFL6       |    | AGAP2     |  | MPPED2  |  | EFNB3      | MDGA2     |
| MANEAL    |           | SCRN1       |  | MMP21       |    | ARHGEF 6  |  | ARAP3   |  | ZNF786     | BCL2L1 5  |
| AWAT2     |           | CD37        |  | DOC2B       |    | SH2D4B    |  | PAX3    |  | GREB1L     | C18orf5 4 |
| ITGB8     |           | PRSS12      |  | GREM1       |    | LBP       |  | SLCO2B1 |  | CEP295 NL  | PRSS12    |
| SVEP1     |           | SOX9        |  | PLCH1       |    | RELL2     |  | TSPAN2  |  | JAZF1      | ABAT      |

|            |  |             |  |            |  |            |  |            |  |           |            |
|------------|--|-------------|--|------------|--|------------|--|------------|--|-----------|------------|
| AEBP1      |  | PCDHG C5    |  | UROC1      |  | FAM89 B    |  | AFF2       |  | ARL9      | IKZF3      |
| PTGDR      |  | ARC         |  | UBA7       |  | P4HTM      |  | ETNK2      |  | STYXL1    | HDC        |
| LRMDA      |  | BIK         |  | HHIPL1     |  | DIRAS1     |  | SLC7A14    |  | TOX       | SNORD 53   |
| KCNA7      |  | APOBEC 3H   |  | ADAMT S20  |  | AOAH       |  | MPP3       |  | GPR156    | PI16       |
| CSF2RA     |  | SEMA6 A     |  | PSMB8      |  | PPP1R1 C   |  | POU2F2     |  | SAMD1 2   | LRRTM 2    |
| ABI3       |  | PDZRN3      |  | DDAH2      |  | ZNF385 C   |  | ZIC1       |  | ADAMT S15 | CYBB       |
| C1QTNF6    |  | CNN1        |  | BCO2       |  | GRIN2C     |  | SNORD63 B  |  | SLFN5     | SYBU       |
| ZNF784     |  | TBX2        |  | SLPI       |  | NR1I2      |  | PREX1      |  | CMTM3     | CCL11      |
| ANKS1B     |  | PCDHB 7     |  | MEIG1      |  | TECTB      |  | MAGIX      |  | NEK2      | ZC3H12 B   |
| ADAMTS 17  |  | EQTN        |  | ACTL7A     |  | GDF3       |  | SLC38A1    |  | KBTBD4    | DERL3      |
| CNTN2      |  | HERC6       |  | ADCY7      |  | DRD2       |  | FAM57B     |  | KCNB1     | LST1       |
| STMN2      |  | PLCL2       |  | CTSZ       |  | GOT1L1     |  | RSPH4A     |  | TRPV2     | OR10V1     |
| STK36      |  | GRB14       |  | RIMS2      |  | KIF2B      |  | UBXN10     |  | THEMIS 2  | INPP5D     |
| DAB2       |  | RUNX1       |  | PLAG1      |  | CXCR1      |  | CIDEA      |  | PCDH18    | ARSJ       |
| ARMCX6     |  | GPSM1       |  | SLITRK3    |  | TEX48      |  | EBF3       |  | KLHL10    | KLHL38     |
| IL17RD     |  | CCDC14 8    |  | SNORD 117  |  | CCDC15 3   |  | PAPPA      |  | TNFSF1 3  | SLC39A 4   |
| RAMP2      |  | HSD17B 11   |  | ARL11      |  | OR2A12     |  | COL28A1    |  | ITGA4     | KITLG      |
| RTKN2      |  | PALM        |  | CIB3       |  | RN7SL6 45P |  | FAXC       |  | KCNA2     | NXNL2      |
| CELF3      |  | DDX4        |  | WDR17      |  | SPRN       |  | HOXB1      |  | OOEP      | KIAA17 55  |
| STC1       |  | TEX14       |  | RIMS1      |  | OSR1       |  | GLB1L2     |  | SLC16A 12 | TNFRSF 11B |
| DNAJC6     |  | PABPC4 L    |  | CCIN       |  | CCDC10 3   |  | PI15       |  | KANK2     | TBC1D3 0   |
| FYN        |  | GLRB        |  | KIAA03 19  |  | SLC15A 3   |  | FST        |  | GPRC5C    | KIT        |
| HRH2       |  | ACO115 29.1 |  | HIST1H 2BE |  | LYZL4      |  | SCARNA1    |  | METTL2 1C | LRCOL1     |
| CDH11      |  | SLC15A 1    |  | ANXA10     |  | IGSF10     |  | SAMD12     |  | ZCCHC3    | BAAT       |
| STRA6      |  | AC1187 54.1 |  | CHGA       |  | SLC10A 5   |  | INCA1      |  | ARC       | PLOD2      |
| TMEM25 3   |  | ACO158 02.6 |  | PRPH2      |  | RNU4-2     |  | TMEM22 9A  |  | FAM18 9B  | NOTUM      |
| TNFRSF11 B |  | GLI1        |  | PRDM5      |  | TMEM1 73   |  | PRRT4      |  | RFTN1     | DMRTC 2    |
| SCNN1B     |  | EPHB2       |  | GATM       |  | RSKR       |  | CCL11      |  | XRRRA1    | MRLN       |
| RNF17      |  | ADORA 2A    |  | DHRS7C     |  | HSD17B 8   |  | SLC9A5     |  | ARHGA P45 | TMEM2 38L  |
| ST3GAL1    |  | CALHM 5     |  | NNMT       |  | MYL9       |  | CRIP3      |  | NHSL2     | WIPF1      |
| PTPRB      |  | FOXF1       |  | RNU6- 105P |  | KIF6       |  | GASK1A     |  | PDLIM7    | PGR        |
| WFDC12     |  | NEIL2       |  | RF0218 7   |  | GRIP2      |  | NAV3       |  | FLNC      | UBASH 3A   |
| JAKMIP2    |  | ACTL9       |  | TRIML1     |  | HES7       |  | TAGLN      |  | CASC1     | AMPD1      |
| EPGN       |  | ADGRB 1     |  | NKX1-2     |  | SATB2      |  | TNFRSF13 B |  | ERICH5    | FAM16 9A   |
| ZHX1       |  | DPP6        |  | BTN2A2     |  | CCNO       |  | FABP7      |  | ELAVL2    | NKPD1      |
| COL5A2     |  | PCDHB 2     |  | GJA5       |  | P2RX6      |  | GXYLT2     |  | EME1      | SNORD 63B  |

|             |  |               |  |                |  |              |  |               |  |              |                |
|-------------|--|---------------|--|----------------|--|--------------|--|---------------|--|--------------|----------------|
| PI16        |  | MIR221        |  | KL             |  | PIP5K1<br>B  |  | DNM1          |  | MIR194<br>-1 | SPNS3          |
| DSG4        |  | STK32A        |  | MIR10B         |  | EMP3         |  | PRKAG3        |  | CATSPE<br>RD | SPRY3          |
| NOS3        |  | LBH           |  | LEMD1          |  | SLC39A<br>5  |  | RNU6-<br>431P |  | AARSD1       | SYT8           |
| ENO2        |  | RELN          |  | RF0041<br>3    |  | SMAD6        |  | MYLK          |  | CCSER1       | INSYN1         |
| REM2        |  | CXCL12        |  | HPGDS          |  | RPL3L        |  | FLT3          |  | ALAS2        | CEP126         |
| CCDC69      |  | RAB26         |  | TPO            |  | ARHGA<br>P6  |  | NR2E1         |  | SNORD<br>55  | P2RX2          |
| KCNG4       |  | GASK1A        |  | HOXA2          |  | ALDH1A<br>3  |  | SPATC1        |  | IQGAP2       | RAB44          |
| PTPRN       |  | SDK2          |  | CHP2           |  | NELL1        |  | MGAT3         |  | PI15         | BATF2          |
| DUSP18      |  | FST           |  | FYN            |  | AMIGO<br>2   |  | PLEK          |  | FN1          | CYP21A<br>2    |
| DUSP10      |  | RGS20         |  | MYT1           |  | COLEC1<br>1  |  | LRRC46        |  | FEZ1         | HAVCR<br>2     |
| HGD         |  | ANKRD<br>60   |  | CHST10         |  | GSPT2        |  | MMRN2         |  | PCBD1        | TNIP3          |
| METRNL      |  | PLCD4         |  | LINGO2         |  | GNGT2        |  | IL2RB         |  | ADAMT<br>S17 | C1orf11<br>5   |
| FAM187B     |  | KLHDC8<br>A   |  | KCTD4          |  | SLC2A1<br>3  |  | ONECUT2       |  | TIGD4        | TBX6           |
| FBLN2       |  | EPS8          |  | BCL2L1<br>4    |  | CALHM<br>5   |  | NCF2          |  | RAB33A       | CYSRT1         |
| SPOCD1      |  | STKLD1        |  | HIST1H<br>4D   |  | IL1F10       |  | PCDH9         |  | HHIPL1       | STX1B          |
| NFE2        |  | OLFM2         |  | CIITA          |  | ZEB1         |  | RF02160       |  | GNG7         | FSD1           |
| PENK        |  | MERTK         |  | ST6GAL<br>NAC2 |  | TGIF2        |  | TCERG1L       |  | REEP2        | TEX101         |
| KIF6        |  | FNDC7         |  | NME5           |  | LRFN3        |  | LHFPL5        |  | TRDC         | SGCD           |
| SPON1       |  | ILDR1         |  | PSTPIP1        |  | MYOM<br>1    |  | FBP1          |  | KIAA16<br>14 | ENTPD3         |
| ADRA2A      |  | SHISA8        |  | COL8A2         |  | IMPG2        |  | PADI1         |  | SH2B2        | RAB3B          |
| SELPLG      |  | TSPAN3<br>2   |  | ITGB8          |  | ANKRD<br>53  |  | EYA1          |  | RET          | SLC4A4         |
| PROX2       |  | RBPM5         |  | HEG1           |  | AOC3         |  | RSPH9         |  | IGSF10       | PDE6A          |
| PTH1R       |  | CCDC88<br>B   |  | ADCY1          |  | VXN          |  | FAM3B         |  | SAPCD2       | SLC7A1<br>1    |
| MERTK       |  | FBLIM1        |  | CLEC6A         |  | FKBP10       |  | CXXC4         |  | UNC80        | CHST1          |
| BGN         |  | AGMAT         |  | THSD1          |  | SEZ6L2       |  | UBD           |  | SPOCK2       | SH3BGR         |
| EPHB1       |  | RNU6-<br>494P |  | CNTN2          |  | HIST1H<br>4L |  | PCOLCE2       |  | MMEL1        | RSKR           |
| STYK1       |  | ANKRD<br>40CL |  | PLPP1          |  | TBKBP1       |  | PDE6A         |  | WFIKKN<br>2  | BPIFC          |
| RASD1       |  | HOXC9         |  | KCNJ14         |  | MYLK3        |  | CSMD3         |  | GREM1        | PARVG          |
| NEUROG<br>3 |  | ARHGA<br>P28  |  | SH3TC2         |  | TMEM1<br>98  |  | BRSK1         |  | CXCL12       | COLGAL<br>T2   |
| CCN3        |  | CCDC18<br>7   |  | PRKAR1<br>B    |  | GSTM2        |  | SSC5D         |  | SETBP1       | PCLO           |
| ADGRL3      |  | ELN           |  | ATP6V1<br>B1   |  | FERMT2       |  | KLHL32        |  | EBI3         | 4-Sep          |
| PLXND1      |  | RNF207        |  | STBD1          |  | MEF2B        |  | RAB42         |  | PCDH8        | COLCA2         |
| AMPD1       |  | CEMIP         |  | HID1           |  | TRIB2        |  | LOXL3         |  | CHRNA<br>3   | C11orf9<br>6   |
| TGFB111     |  | RAP1G<br>AP2  |  | ANGPTL<br>7    |  | NOS3         |  | HS3ST3A<br>1  |  | CDH7         | AL1217<br>68.1 |
| GRIN1       |  | DNM3          |  | KCNRG          |  | CFAP29<br>9  |  | SCARF1        |  | CLVS2        | JDP2           |
| RTN4RL1     |  | TMEM1<br>50C  |  | APBB1          |  | FAM22<br>7B  |  | POLN          |  | UBQLN<br>3   | HSPA1L         |

|          |  |           |  |            |  |          |  |          |  |            |           |
|----------|--|-----------|--|------------|--|----------|--|----------|--|------------|-----------|
| BEGAIN   |  | HENMT1    |  | AC124319.1 |  | IGLON5   |  | HOXD11   |  | OR2A12     | ZC3H12D   |
| CCDC114  |  | SHISA2    |  | CDHR3      |  | ADORA2A  |  | PLA2G2C  |  | HSPB7      | NPS       |
| ALS2CR12 |  | MRLN      |  | PDE6A      |  | GLIS1    |  | DNAH3    |  | SLC17A1    | PGLYRP3   |
| ANGPT1   |  | ACTL7A    |  | CCR10      |  | SCN5A    |  | MEF2C    |  | MCF2       | LPL       |
| APLN     |  | DPYSL5    |  | GSTM3      |  | APOL6    |  | MKRN20S  |  | CATSPERB   | LRRC46    |
| FBXO2    |  | SCARN A7  |  | CFAP70     |  | SLC9A3R2 |  | RBM11    |  | EPX        | KLK10     |
| TMEM8A   |  | KLK5      |  | GPX3       |  | GJB2     |  | CFAP77   |  | AL589666.1 | STAC2     |
| MEGF10   |  | SLC40A1   |  | VSNL1      |  | PYGM     |  | TTC16    |  | PKD1L1     | HSD17B8   |
| HELZ2    |  | RWDD2A    |  | FAM78B     |  | ABCC6    |  | FOXF2    |  | PROSER3    | ITGAL     |
| PLCXD1   |  | CALML4    |  | FAM171A2   |  | ADM      |  | KRT84    |  | FYB2       | TMEM45B   |
| CRTAM    |  | SCUBE3    |  | HCK        |  | EFHC1    |  | CACNA1E  |  | RUNX2      | HORMAD2   |
| ZC3H12D  |  | RNF152    |  | CYBRD1     |  | LBH      |  | TSPYL5   |  | RPL36      | ANGPT4    |
| EDNRA    |  | GSTM3     |  | NEFH       |  | MYBPHL   |  | KANK4    |  | SCML4      | INSYN2    |
| KIF27    |  | CEP112    |  | ADGRL3     |  | PRDM8    |  | PCDHB7   |  | GRAMD1B    | RPL36A L  |
| GPR137C  |  | DAPK2     |  | ETV4       |  | NOTUM    |  | MIR27A   |  | PIK3CD     | NRAP      |
| NGF      |  | PAPPA     |  | NRIP3      |  | NEURL1   |  | DPYD     |  | TRIM71     | PRR15     |
| CHST8    |  | SOGA1     |  | NWD1       |  | HENMT1   |  | DACT1    |  | ADD2       | LINGO3    |
| IQGAP2   |  | GARNL3    |  | AMIGO2     |  | BGN      |  | GPR34    |  | CCDC18     | CDK14     |
| ARHGEF15 |  | SAT2      |  | CPA4       |  | SH2D7    |  | SERPIND1 |  | NOVA1      | ASPG      |
| ADAMTS20 |  | CELF3     |  | ATOX8      |  | CCDC154  |  | NFAM1    |  | CARD11     | LENEP     |
| KCNE4    |  | MIR186    |  | FZD3       |  | PRG4     |  | PRSS57   |  | KIF21B     | ROM1      |
| GPRIN3   |  | MAP3K21   |  | LTBP1      |  | PRR16    |  | KRT24    |  | NT5E       | GPR137C   |
| ARHGAP28 |  | SLC18A2   |  | TMEM88     |  | IGF1     |  | CYP46A1  |  | P3H3       | TSPAN2    |
| DLG4     |  | DMBX1     |  | CLDN8      |  | GPR68    |  | GALNT12  |  | MAP2       | IFI44     |
| FN3K     |  | SNORA20   |  | ANGPTL2    |  | SERPINE1 |  | GAB3     |  | ZNF213     | KLK7      |
| RHO      |  | CYP1B1    |  | HECW1      |  | CABP1    |  | ZNF536   |  | LHX2       | HCN4      |
| LOXL2    |  | NODAL     |  | ASTN2      |  | TMEM178B |  | TNFRSF9  |  | KIAA0895L  | RN7SKP11  |
| TIMP2    |  | PANX2     |  | SLC15A1    |  | CHCHD10  |  | CPQ      |  | MARK1      | SELENO M  |
| COLEC12  |  | KALRN     |  | KRT28      |  | INSYN2   |  | ADAMTS9  |  | ASPA       | CNGA2     |
| PCDHGC4  |  | PROM1     |  | AQP9       |  | MYL6B    |  | KRT35    |  | TGFB3      | RNU6-622P |
| HEG1     |  | UTS2      |  | TSLP       |  | ENG      |  | RASGEF1A |  | NTRK2      | PNMT      |
| USP35    |  | HOXB1     |  | KIT        |  | DUSP18   |  | SEMA6A   |  | GAS7       | PCDHB2    |
| AARSD1   |  | ARHGA P24 |  | CMYA5      |  | MKRN3    |  | TERB1    |  | ETV2       | SNORD49A  |
| REC114   |  | RYR3      |  | MYLK       |  | PADI4    |  | PRRT3    |  | SLC25A2    | TC2N      |
| CYP2U1   |  | MISP      |  | BST2       |  | KCNC3    |  | SH3RF3   |  | EFR3B      | KCNC4     |
| SDK2     |  | NALCN     |  | FOXI3      |  | SYDE1    |  | PCDH15   |  | ADCY7      | SLFNL1    |

|         |  |              |  |             |  |               |  |          |  |             |              |
|---------|--|--------------|--|-------------|--|---------------|--|----------|--|-------------|--------------|
| LBH     |  | C2orf92      |  | SHD         |  | UBXN1<br>1    |  | SLC12A5  |  | PSD2        | SCARNA<br>22 |
| CHRNA1  |  | BMF          |  | PCDHB1<br>4 |  | PLPPR2        |  | TEKT5    |  | WDR93       | ARID3C       |
| ABCB5   |  | PLAUR        |  | TGIF2       |  | SCG3          |  | KRT36    |  | PGF         | LCK          |
| BMF     |  | SCML4        |  | CRIP3       |  | H1FX          |  | TSPAN13  |  | GULP1       | ZNF850       |
| MAJIN   |  | PGLYRP<br>1  |  | LRMDA       |  | PLK3          |  | IRX4     |  | AZIN2       | CA9          |
| SLC18A1 |  | CD248        |  | IL34        |  | NR1H3         |  | C10orf62 |  | MAP1B       | PCDHG<br>A5  |
| SOX9    |  | PIP5K1<br>B  |  | OGDHL       |  | CHRNA<br>1    |  | CD80     |  | STAB1       | FLVCR2       |
| C2orf88 |  | ADAMT<br>SL1 |  | GNGT2       |  | HUNK          |  | STK36    |  | CAMK2<br>N2 | MKRN3        |
| GPC6    |  | ATP6V1<br>C2 |  | PLCL2       |  | MIR374<br>B   |  | TRIM6    |  | WNT2B       | CD300L<br>B  |
| PAQR8   |  | PTGDR        |  | OSBP2       |  | SNORD<br>10   |  | PRR36    |  | RPS6KL<br>1 | PYROXD<br>2  |
| NKD2    |  | HSD11B<br>2  |  | ABLIM3      |  | GNG7          |  | LMOD2    |  | MYOM<br>1   | IL10RA       |
| GASK1B  |  | RSPH4A       |  | BRSK1       |  | RNU6-<br>133P |  | WNK3     |  | CAMKM<br>T  | AKAP6        |
| PCDHGA8 |  | EPOR         |  | SLC15A<br>2 |  | EPHA8         |  | GFRA1    |  | TRIB3       | HOXA1<br>0   |
| IRF4    |  | ATP6V1<br>B1 |  | CLVS1       |  | NAV1          |  | KRT8     |  | DGKG        | HES7         |
| ZFP30   |  | SPINK5       |  | PXDN        |  | DIRAS2        |  | RNF151   |  | PKNOX<br>2  | RIMKLA       |
| APOBEC1 |  | NOXRE<br>D1  |  | TMOD2       |  | SHC4          |  | PDZD3    |  | IL1F10      | TSPAN8       |
| ENPP3   |  | ABCB5        |  | MPPED<br>2  |  | DACT2         |  | INPP5D   |  | RF0115<br>9 | LIPG         |
| SGCA    |  | ALCAM        |  | KCNH7       |  | FKBP11        |  | HGD      |  | SOX9        | RASAL3       |
| NFE2L3  |  | HTRA3        |  | AGMO        |  | NAALA<br>DL1  |  | DCHS1    |  | HPGD        | BICD1        |
| ACOT11  |  | PLEKHG<br>4  |  | PCDHG<br>B2 |  | CC2D2B        |  | CACNA1F  |  | BIN1        | FSD1L        |
| SRRM4   |  | RTKN2        |  | FEZ1        |  | TUBG2         |  | ANGPT1   |  | IL22RA1     | TMEM2<br>5   |
| DNAJC12 |  | LRIG1        |  | PALM        |  | PCBP3         |  | DCLK1    |  | TIFA        | CCR8         |
| CA7     |  | LINGO1       |  | DCDC2<br>B  |  | NFIL3         |  | DIPK1B   |  | EHD3        | GNG4         |
| NFATC4  |  | EDNRA        |  | C7orf31     |  | OSGIN1        |  | WAS      |  | CALCB       | ZBTB46       |
| MN1     |  | GEM          |  | SYT9        |  | ZNF250        |  | LYPD1    |  | GJA3        | MAGEE<br>2   |
| LIPH    |  | TMTC1        |  | MPIG6B      |  | OTUD7<br>A    |  | FFAR2    |  | KRT17       | MESP1        |
| NLGN2   |  | ITIH5        |  | TNFAIP<br>2 |  |               |  | APOBR    |  | NOG         | CIDEA        |
| LRP2BP  |  | TMEM1<br>21  |  | GRIN3B      |  |               |  | NAPSA    |  | CDO1        | KCNN2        |
| ZNF521  |  | NYAP1        |  | TRIM6       |  |               |  | TFCP2L1  |  |             | HECTD2       |
| PPM1J   |  | GRIN3A       |  | FSTL1       |  |               |  | MED12L   |  |             | CFAP10<br>0  |
| ADCY1   |  | RHPN2        |  | SLC6A1<br>5 |  |               |  | DSCAML1  |  |             | CDKL3        |
| MIGA1   |  | GPR153       |  | PDZD9       |  |               |  | HOXC13   |  |             | PRDM8        |
| DDX4    |  | NFE2L3       |  | MEIS3       |  |               |  | KCNQ2    |  |             | C4orf19      |
| SBSPON  |  | APOBEC<br>1  |  | STX1A       |  |               |  | UNC13C   |  |             | AMOT         |
| HIPK4   |  | GPR173       |  | HTRA4       |  |               |  | SLC6A5   |  |             | ARMC2        |
| MYL7    |  | CMTM8        |  | TIMP2       |  |               |  | SLC5A5   |  |             | C1QTNF<br>3  |

|              |  |               |  |                |  |  |  |                   |  |  |               |
|--------------|--|---------------|--|----------------|--|--|--|-------------------|--|--|---------------|
| RASGRF1      |  | NPB           |  | DAPK2          |  |  |  | GNAZ              |  |  | NRXN1         |
| ABI3BP       |  | MESP1         |  | SMIM2<br>4     |  |  |  | TACR3             |  |  | TMEM8<br>8    |
| NT5E         |  | C1orf15<br>8  |  | CGN            |  |  |  | MIGA1             |  |  | HOXA4         |
| IL7          |  | TRIQQ         |  | TRPV1          |  |  |  | IGSF10            |  |  | SAG           |
| CCL2         |  | IGSF10        |  | EPCAM          |  |  |  | DTX1              |  |  | ACTN3         |
| BMP6         |  | KRTAP7<br>-1  |  | COL4A1         |  |  |  | MPO               |  |  | GPAT3         |
| LGALS12      |  | RNU6-<br>638P |  | PTPRK          |  |  |  | LRRC4             |  |  | HOXD1<br>0    |
| SETBP1       |  | DNAJB1<br>3   |  | CMTM3          |  |  |  | DNAH2             |  |  | OIT3          |
| PODXL        |  | NPAS1         |  | GPR135         |  |  |  | GPX2              |  |  | DIPK1B        |
| TMEM98       |  | TMEM1<br>00   |  | FAM22<br>1B    |  |  |  | TMEM15<br>1A      |  |  | CCDC17<br>3   |
| ITGB7        |  | GPRIN1        |  | PCDHB6         |  |  |  | CRACR2A           |  |  | MT-<br>ND6    |
| MYORG        |  | CASQ2         |  | SCRN1          |  |  |  | AIPL1             |  |  | PIH1D2        |
| ADAMTSL<br>4 |  | LRP2BP        |  | AD0008<br>64.1 |  |  |  | TMPRSS7           |  |  | RBM11         |
| COL15A1      |  | ADAMT<br>SL4  |  | RAD51A<br>P2   |  |  |  | RELN              |  |  | ELF5          |
| ITPRID1      |  | UPP1          |  | CCNO           |  |  |  | ETNPPL            |  |  | WIF1          |
| C5orf49      |  | CBLN3         |  | NOS3           |  |  |  | NKX2-1            |  |  | FBXO48        |
| MORN4        |  | SCN5A         |  | DIPK1B         |  |  |  | CHGA              |  |  | C9orf13<br>1  |
| ARHGAP3<br>0 |  | PTPRK         |  | FGFRL1         |  |  |  | TMEM13<br>2E      |  |  | SRMS          |
| SLPI         |  | B3GNT3        |  | SHROO<br>M3    |  |  |  | SLC17A6           |  |  | TNFRSF<br>13B |
| FSCN2        |  | MARK1         |  | DIXDC1         |  |  |  | TBX18             |  |  | SNORD<br>45A  |
| CEP112       |  | IGFALS        |  | PTGES          |  |  |  | SYTL4             |  |  | ANXA3         |
| NKAIN1       |  | SPATS2<br>L   |  | TET1           |  |  |  | DPP10             |  |  | IGFBP5        |
| BCL6B        |  | ZC4H2         |  | COL6A1         |  |  |  | LRP2BP            |  |  | CD84          |
| SNORD49<br>A |  | TBKBP1        |  | SYCE1L         |  |  |  | HECTD2            |  |  | USP50         |
| GUCA1A       |  | PLXNA4        |  | MAPK1<br>1     |  |  |  | NOSTRIN           |  |  | SAMD9<br>L    |
| LY6G6D       |  | SCARA5        |  | P2RX6          |  |  |  | PLCE1             |  |  | SNORD<br>98   |
| YPEL2        |  | EPCAM         |  | MECO<br>M      |  |  |  | FOXE1             |  |  | KLK6          |
| FXYD6        |  | FZD7          |  | ARHGA<br>P40   |  |  |  | NCCRP1            |  |  | ATP6V1<br>B1  |
| FAM189B      |  | HES2          |  | DBN1           |  |  |  | GRIP2             |  |  | PLA2G5        |
| COL8A1       |  | SCHIP1        |  | MAP3K<br>15    |  |  |  | CPN1              |  |  | TNNC1         |
| GPAT3        |  | WDR63         |  | PCED1B         |  |  |  | SYNJ2BP-<br>COX16 |  |  | OTOGL         |
| C22orf23     |  | TAGLN         |  | SNORD<br>53    |  |  |  | OSBPL6            |  |  | RNU6-<br>638P |
| SOX18        |  | SAMD1<br>2    |  | TLR4           |  |  |  | RHOH              |  |  | RPS12         |
| TLR4         |  | TMEM2<br>52   |  | DPP10          |  |  |  | LRRTM1            |  |  | HOXD9         |
| MYH10        |  | PRDM1<br>3    |  | LRRC32         |  |  |  | ACSM4             |  |  | TSPAN1<br>2   |
| NAALADL<br>2 |  | COL8A1        |  | C11orf9<br>1   |  |  |  | MPZ               |  |  | GPR68         |



|              |  |              |  |               |  |  |  |              |  |  |                     |
|--------------|--|--------------|--|---------------|--|--|--|--------------|--|--|---------------------|
| CTNND2       |  | ANO4         |  | FAM18<br>7B   |  |  |  | MFAP4        |  |  | CD53                |
| SYDE2        |  | RLBP1        |  | ACSS1         |  |  |  | DUSP13       |  |  | POLN                |
| TBX1         |  | STBD1        |  | EML1          |  |  |  | SATB2        |  |  | EMILIN<br>3         |
| PACSIN1      |  | MIR7-1       |  | XRRA1         |  |  |  | KLK6         |  |  | DACH2               |
| CTRL         |  | PCSK6        |  | ATP1B1        |  |  |  | GPR22        |  |  | CHRM1               |
| UPP1         |  | WSCD2        |  | TEK           |  |  |  | CD248        |  |  | RTN4RL<br>2         |
| THSD7A       |  | AMIGO<br>2   |  | DLG4          |  |  |  | SLC35F1      |  |  | HRCT1               |
| TSPAN2       |  | SCARN<br>A6  |  | FERMT2        |  |  |  | RNASE1       |  |  | ELF3                |
| KIF5A        |  | TMEM2<br>00B |  | MIGA1         |  |  |  | RILP         |  |  | NXPE3               |
| SLC25A23     |  | SCUBE2       |  | BLNK          |  |  |  | CCR5         |  |  | OPN1S<br>W          |
| KALRN        |  | FBP1         |  | COL4A2        |  |  |  | SOSTDC1      |  |  | P2RY2               |
| SHROOM<br>3  |  | TM4SF1       |  | AFF3          |  |  |  | APOM         |  |  | CAVIN2              |
| NEFH         |  | PCSK9        |  | DNAH2         |  |  |  | RHOF         |  |  | EFCAB5              |
| PYROXD2      |  | S100B        |  | PTPRN2        |  |  |  | DIRAS1       |  |  | NEURL2              |
| ARSA         |  | TMEM9<br>8   |  | RASSF2        |  |  |  | IPCEF1       |  |  | ZC3H12<br>C         |
| ARHGAP2<br>4 |  | CAMKV        |  | FAS           |  |  |  | MRVI1        |  |  | AC0055<br>51.1      |
| VAMP5        |  | CCDC17<br>7  |  | ARHGA<br>P24  |  |  |  | GATA6        |  |  | OSBP2               |
| SPINK2       |  | SLPI         |  | SERPIN<br>B11 |  |  |  | RSAD2        |  |  | GGACT<br>MBLAC<br>1 |
| ERO1B        |  | GRAMD<br>1B  |  | AQP11         |  |  |  | RHOC         |  |  |                     |
| PCDHGB5      |  | DIRAS1       |  | OTULIN<br>L   |  |  |  | COL5A2       |  |  | AGTR2               |
| TERB1        |  | DPYSL3       |  | SCEL          |  |  |  | NT5E         |  |  | CATSPE<br>R3        |
| EGR2         |  | PHLDA1       |  | CLMN          |  |  |  | EDN2         |  |  | ZAN                 |
| HOXA2        |  | NKAIN1       |  | LAT2          |  |  |  | NHLH2        |  |  | RAB3IL<br>1         |
| RIIAD1       |  | SNORA<br>62  |  | ACTN2         |  |  |  | CCR2         |  |  | OTOP1               |
| TENT5C       |  | GNB4         |  | SPOCD1        |  |  |  | CACNA2D<br>3 |  |  | TMEM1<br>32D        |
| ARMCX2       |  | COX7A1       |  | ACSF2         |  |  |  | PCSK2        |  |  | ASPDH               |
| ENO3         |  | DCLK3        |  | SPINK2        |  |  |  | MAJIN        |  |  | TRPM1               |
| DOK5         |  | TMEM2<br>49  |  | PRKCQ         |  |  |  | GUCY1B1      |  |  | LTK                 |
| LOXL4        |  | FXYD6        |  | SIGLEC1       |  |  |  | MYL9         |  |  | C16orf5<br>4        |
| RNF157       |  | TRABD2<br>B  |  | DPYD          |  |  |  | TYROBP       |  |  | SLC24A<br>2         |
| FBXO27       |  | OPTC         |  | APCDD<br>1    |  |  |  | GCH1         |  |  | KLHL31              |
|              |  | ANKRD<br>65  |  | MED12<br>L    |  |  |  | CCDC102<br>A |  |  | B3GNT6              |
|              |  | IGFBP6       |  | KIF27         |  |  |  | B3GALT2      |  |  | C3orf62             |
|              |  | LTBP1        |  | ALDH3A<br>1   |  |  |  | PCP2         |  |  | RN7SKP<br>231       |
|              |  | CAPN6        |  | CA7           |  |  |  | PM20D1       |  |  | GPR21               |
|              |  | SHROO<br>M4  |  | CHST2         |  |  |  | CNTN2        |  |  | ENDOU               |
|              |  | AFM          |  | PCDH19        |  |  |  | RAMP1        |  |  | SPI1                |

|  |          |          |  |          |  |            |
|--|----------|----------|--|----------|--|------------|
|  | DLEC1    | NR1I3    |  | TSNAXIP1 |  | LYPD5      |
|  | SLC41A3  | MGP      |  | FOXC1    |  | HS3ST1     |
|  | ATP1A2   | MYH13    |  | TM6SF2   |  | RASSF4     |
|  | CHI3L1   | AJAP1    |  | CYP1B1   |  | TEKT5      |
|  | GRID2IP  | PDZD7    |  | CLEC5A   |  | APC2       |
|  | SNX32    | GLI1     |  | SRGAP3   |  | HLX        |
|  | ABCG4    | GPRIN3   |  | UPK1A    |  | C20orf173  |
|  | ENPP1    | GRK4     |  | TMEM204  |  | PTPN22     |
|  | SASH3    | NEK11    |  | SNORA2C  |  | FABP7      |
|  | FSCN2    | VAV1     |  | KCNN2    |  | FAM217B    |
|  | FBP2     | VCAN     |  | CALHM5   |  | PDE1B      |
|  | CPED1    | CYBA     |  | ITGB7    |  | SMTNL2     |
|  | SSPO     | SLC16A2  |  | SLC39A5  |  | XKR8       |
|  | PI15     | LMO1     |  | MSANTD1  |  | MIR339     |
|  | ICA1L    | BMP6     |  | RGS16    |  | PKP2       |
|  | LRRC10B  | UNC5D    |  | HSD17B1  |  | ENPP3      |
|  | GRIK3    | PHKG1    |  | PGLYRP4  |  | FRMD7      |
|  | DNAH1    | MDGA2    |  | PPP1R1C  |  | WFDC3      |
|  | SLC9A5   | HOXD1    |  | APBA2    |  | BBS10      |
|  | KLHL4    | PDZD4    |  | ZEB1     |  | NR2F2      |
|  | KCTD14   | DHRS9    |  | KIF26A   |  | ST6GALNAC3 |
|  | RASGRP1  | PSD      |  | MYOM1    |  | GRIK3      |
|  | AEBP1    | TIGD3    |  | NEFH     |  | CSF1R      |
|  | NDN      | RARB     |  | SLC38A3  |  | PPFIA4     |
|  | ARHGEF17 | EPS8     |  | CA6      |  | KCNJ14     |
|  | ENPP2    | EPPK1    |  | RLBP1    |  | SCAMP4     |
|  | LOXHD1   | JMJD7    |  | CPSF4L   |  | TDRD6      |
|  | CLEC14A  | LPCAT4   |  | EVX2     |  | SH3RF3     |
|  | ZSCAN2   | PKIA     |  | SLC7A3   |  | C12orf60   |
|  | VSIG8    | LNP1     |  | LRG1     |  | MN1        |
|  | FLVCR2   | IL19     |  | ZEB2     |  | ACTL10     |
|  | SNORD71  | SLC25A23 |  | CACNB2   |  | CST6       |
|  | GP1BA    | AGR2     |  | AMOT     |  | LKAAEAR1   |
|  | HEG1     | FBP2     |  | HYKK     |  | GPD1       |
|  | SDSL     | ACTA2    |  | CFAP157  |  | LIX1       |
|  | SEMA6C   | CORO1A   |  | C11orf16 |  | TSTD1      |
|  | FBXO2    | CCL20    |  | DKKL1    |  | LRRC39     |
|  | NLRC5    | ITIH5    |  | CUBN     |  | SERPINB12  |
|  | CLDN4    | CFAP299  |  | DNAH9    |  | PATE2      |
|  | ZNF648   | GALNT16  |  | ANO4     |  | DOCK3      |

|  |          |  |           |  |  |  |          |  |           |
|--|----------|--|-----------|--|--|--|----------|--|-----------|
|  | ELK3     |  | SPRED3    |  |  |  | LRRD1    |  | ERICH3    |
|  | SNORD59A |  | RBPM5     |  |  |  | RINL     |  | APOH      |
|  | PLVAP    |  | MLANA     |  |  |  | APBB1    |  | COL5A3    |
|  | DNER     |  | HRC       |  |  |  | TMEM95   |  | FBXO24    |
|  | PKD1L1   |  | CTNND2    |  |  |  | ALDH1A3  |  | CNTD1     |
|  | NRXN2    |  | TERT      |  |  |  | GCK      |  | CD247     |
|  | ADGRL2   |  | FMN1      |  |  |  | LEPR     |  | CHIC1     |
|  | ASXL3    |  | IGSF9     |  |  |  | TTC12    |  | CCK       |
|  | FAM13A   |  | C4orf47   |  |  |  | GPRC5B   |  | PCDH17    |
|  | IL7      |  | YPEL4     |  |  |  | RGL1     |  | NRK       |
|  | CPA4     |  | PLAUR     |  |  |  | ADRA1A   |  | FNDC11    |
|  | FZD3     |  | FCHO1     |  |  |  | LAT      |  | DOK6      |
|  | KCNQ4    |  | KLHL3     |  |  |  | ANKRD65  |  | SOX11     |
|  | PCDH1    |  | DGAT2L6   |  |  |  | GALNT14  |  | DMBT1     |
|  | CHIC1    |  | ENC1      |  |  |  | NRCAM    |  | CLCN1     |
|  | TEX26    |  | EGR3      |  |  |  | SLC5A8   |  | RASL12    |
|  | CAVIN2   |  | LPO       |  |  |  | SETBP1   |  | KIAA1549L |
|  | DACH1    |  | IGF1      |  |  |  | TRPC6    |  | ZP1       |
|  | ACTA2    |  | FGFR1     |  |  |  | CTRL     |  | LHX3      |
|  | OPRL1    |  | BIK       |  |  |  | UBE2QL1  |  | TMEM232   |
|  | PPARG    |  | CATSPEED  |  |  |  | LRRC39   |  | POU6F2    |
|  | TMEM59L  |  | EPHB2     |  |  |  | FHL3     |  | TMEM121B  |
|  | PPM1N    |  | CAVIN2    |  |  |  | FGF1     |  | SSTR2     |
|  | TMIGD1   |  | TMEM200B  |  |  |  | RGS20    |  | IL1RAPL2  |
|  | NREP     |  | TGM5      |  |  |  | ZBTB32   |  | KCNS2     |
|  | OSBP2    |  | ETNK2     |  |  |  | RNU4-2   |  | RGS22     |
|  | CCDC173  |  | C20orf194 |  |  |  | MMP8     |  | NT5C1A    |
|  | SLC9A3R2 |  | TAS1R3    |  |  |  | AVIL     |  | CIB3      |
|  | RN7SKP70 |  | SERPING1  |  |  |  | FOXP2    |  | TBATA     |
|  | MINAR2   |  | CLDN1     |  |  |  | OASL     |  | COL26A1   |
|  | FAM149A  |  | PDE1B     |  |  |  | PRKAR1B  |  | SNORD127  |
|  | SFTPC    |  | ICAM1     |  |  |  | PLXNC1   |  | PRSS57    |
|  | ESYT3    |  | LINGO1    |  |  |  | SLC35D3  |  | MAEL      |
|  | TSTD1    |  | STAC2     |  |  |  | OGDHL    |  | CHST4     |
|  | XIRP1    |  | AIPL1     |  |  |  | HIST2H3D |  | TUB       |
|  | REEP2    |  | SYT12     |  |  |  | LAMA4    |  | SGCZ      |
|  | SCARA3   |  | HYAL3     |  |  |  | LGI4     |  | IMPG1     |
|  | TNFSF13B |  | NLRC3     |  |  |  | NOBOX    |  | CACNA2D4  |
|  | IQGAP2   |  | SYNE3     |  |  |  | GRASP    |  | NOS2      |
|  | RASD2    |  | C1QTNF12  |  |  |  | CDK3     |  | P4HA3     |
|  | B4GALT4  |  | TBC1D9    |  |  |  | GLIS1    |  | RNU6-365P |
|  | ADH7     |  | ARG1      |  |  |  | NALCN    |  | PCDHA C1  |

|  |  |         |  |          |  |  |  |          |  |  |            |
|--|--|---------|--|----------|--|--|--|----------|--|--|------------|
|  |  | CST6    |  | HELZ2    |  |  |  | SPATA7   |  |  | CLVS1      |
|  |  | TGFB3   |  | PCSK5    |  |  |  | SCN5A    |  |  | PCP2       |
|  |  | C7orf31 |  | CHKB     |  |  |  | GDAP1    |  |  | SLC4A10    |
|  |  | CD83    |  | INPP4B   |  |  |  | RSPH1    |  |  | CDHR4      |
|  |  | ANAPC15 |  | ARID5A   |  |  |  | NPAS1    |  |  | RNU6-1204P |
|  |  | CDO1    |  | UCP2     |  |  |  | SDS      |  |  | SRARP      |
|  |  | ICA1    |  | DCLK3    |  |  |  | COX6B2   |  |  | ACOD1      |
|  |  | SYNPO2  |  | CSF1     |  |  |  | CD5      |  |  | F9         |
|  |  | DBNDD1  |  | SPTB     |  |  |  | PROX2    |  |  | CFAP97D1   |
|  |  | KIRREL1 |  | SLC9B2   |  |  |  | CHRM3    |  |  | HMX2       |
|  |  | NACAD   |  | LEXM     |  |  |  | TBX15    |  |  | MYH6       |
|  |  | DOCK4   |  | FBN1     |  |  |  | CPS1     |  |  | TRIM34     |
|  |  | EGR3    |  | KHDRBS3  |  |  |  | ABCC6    |  |  | WT1        |
|  |  | SPATA20 |  | ADGRV1   |  |  |  | RF02271  |  |  | CRHBP      |
|  |  | KLHL31  |  | RAB17    |  |  |  | SORBS2   |  |  | KEL        |
|  |  | UPB1    |  | INSL6    |  |  |  | ADD2     |  |  | MRO        |
|  |  | ZNF385C |  | SLC39A4  |  |  |  | TXLNB    |  |  | CCDC36     |
|  |  | SLA     |  | DNAJC28  |  |  |  | FMO1     |  |  | NR1I2      |
|  |  | CFAP54  |  | RBPM52   |  |  |  | ADM      |  |  | DRD2       |
|  |  | APOM    |  | KLK5     |  |  |  | CNFN     |  |  | CXCR1      |
|  |  | GPR37   |  | RFX3     |  |  |  | HAS1     |  |  | IPCEF1     |
|  |  | SCEL    |  | RPS12    |  |  |  | SSTR4    |  |  | TRIML1     |
|  |  | IL4     |  | NUAK1    |  |  |  | RNF32    |  |  | HIST1H4D   |
|  |  | REM2    |  | PKD4     |  |  |  | FOXA3    |  |  | OR52J3     |
|  |  | EMB     |  | RSPH9    |  |  |  | DNAI2    |  |  | LEXM       |
|  |  | SPON2   |  | ARHGA4   |  |  |  | ABHD16B  |  |  | HEATR9     |
|  |  | IL17RD  |  | TNFAIP3  |  |  |  | PTGER1   |  |  | KCNMB1     |
|  |  | GSTM2   |  | ARHGEF25 |  |  |  | ADGRA2   |  |  | MYOCD      |
|  |  | HES3    |  | UTS2     |  |  |  | AVPR1A   |  |  | DRD1       |
|  |  | SPATA3  |  | MYH7     |  |  |  | NEURL3   |  |  | MSR1       |
|  |  | EFNB2   |  | AGMAT    |  |  |  | MYH11    |  |  | IL6        |
|  |  | PPP2R2C |  | EMB      |  |  |  | CORO1A   |  |  | CDK15      |
|  |  | LRP3    |  | IL17RD   |  |  |  | CACNA2D2 |  |  | SPAG17     |
|  |  | FBN1    |  | ELAVL2   |  |  |  | FES      |  |  | CAVIN4     |
|  |  | LPCAT4  |  | SACS     |  |  |  | SLA2     |  |  | ABCG2      |
|  |  |         |  | CALCRL   |  |  |  | HAS2     |  |  | UNCX       |
|  |  |         |  | LIFR     |  |  |  | GAL3ST3  |  |  | PRSS37     |
|  |  |         |  | RNU12    |  |  |  | WNT2B    |  |  | FGF20      |
|  |  |         |  | PTPN18   |  |  |  | DNAJB7   |  |  | TBX20      |
|  |  |         |  | SGK1     |  |  |  | MIR99A   |  |  | GLB1L3     |
|  |  |         |  | COX6B2   |  |  |  | STAB1    |  |  | SLC9C1     |
|  |  |         |  | RBP1     |  |  |  | MORN3    |  |  | PMCH       |
|  |  |         |  | FMNL1    |  |  |  | DUOX2    |  |  | VNN1       |
|  |  |         |  | FBLN1    |  |  |  | SLIT1    |  |  | TLR8       |
|  |  |         |  | ENPP1    |  |  |  | RUSC2    |  |  | SLCO4C1    |

|  |  |  |  |                |  |  |  |              |  |                |
|--|--|--|--|----------------|--|--|--|--------------|--|----------------|
|  |  |  |  | NOX1           |  |  |  | FAM222A      |  | TRARG1         |
|  |  |  |  | TRIB1          |  |  |  | TC2N         |  | ENPP7          |
|  |  |  |  | ITPKB          |  |  |  | TRPV5        |  | DOC2A          |
|  |  |  |  | ZNF449         |  |  |  | CHD5         |  | CLEC12<br>A    |
|  |  |  |  | SSC5D          |  |  |  | HIST1H1D     |  | OSM            |
|  |  |  |  | AKAP6          |  |  |  | FBXW10       |  | OR6A2          |
|  |  |  |  | LMX1B          |  |  |  | C10orf95     |  | OR4X1          |
|  |  |  |  | CSRNP3         |  |  |  | ENTPD3       |  | MUC21          |
|  |  |  |  | SELENO<br>M    |  |  |  | GSAP         |  | AC1876<br>53.1 |
|  |  |  |  | ATP6V1<br>C2   |  |  |  | ZNF334       |  | LHX8           |
|  |  |  |  | SRCIN1         |  |  |  | MYPN         |  | GALNTL<br>6    |
|  |  |  |  | SMIM1          |  |  |  | RAB17        |  | WDR49          |
|  |  |  |  | AP0029<br>56.1 |  |  |  | SHROOM<br>3  |  | GSTA5          |
|  |  |  |  | GAMT           |  |  |  | FCHO1        |  | HSD17B<br>14   |
|  |  |  |  | OPN5           |  |  |  | INPP5J       |  | PCDHB3         |
|  |  |  |  | ADGRA<br>3     |  |  |  | BBS10        |  | TRMT1<br>3     |
|  |  |  |  | AC0084<br>03.1 |  |  |  | MYH10        |  | JAKMIP<br>2    |
|  |  |  |  | CHI3L1         |  |  |  | PPP1R3B      |  | TMEM2<br>40    |
|  |  |  |  | SLC41A<br>3    |  |  |  | HOXD9        |  | GJB2           |
|  |  |  |  | HSD17B<br>8    |  |  |  | LRRC75B      |  | EPST11         |
|  |  |  |  | EFNB3          |  |  |  | TDRKH        |  | FBP1           |
|  |  |  |  | MCF2L          |  |  |  | C1QC         |  | SHISA8         |
|  |  |  |  | CCDC36         |  |  |  | PCDHGA5      |  | SEC31B         |
|  |  |  |  | SYT4           |  |  |  | MMP17        |  | RSAD2          |
|  |  |  |  | FTCD           |  |  |  | LGR5         |  | FERMT2         |
|  |  |  |  | CACNA<br>1C    |  |  |  | MIR103A<br>2 |  | SMIM3<br>8     |
|  |  |  |  | ITGA8          |  |  |  | TRIM67       |  | SPATA4<br>6    |
|  |  |  |  | SFXN4          |  |  |  | SRARP        |  | GCA            |
|  |  |  |  | ADAMT<br>SL4   |  |  |  | GDAP1L1      |  | DEGS2          |
|  |  |  |  | GDAP1L<br>1    |  |  |  | DLG4         |  | FMOD           |
|  |  |  |  | NECAB3         |  |  |  | RBP1         |  | SNX22          |
|  |  |  |  | IGSF10         |  |  |  | SPRY4        |  | FBLIM1         |
|  |  |  |  | ISM2           |  |  |  | HOXC9        |  | TSSK4          |
|  |  |  |  | SEMA6<br>D     |  |  |  | GNGT2        |  | ARHGEF<br>33   |
|  |  |  |  | PCDHG<br>A7    |  |  |  | CCDC154      |  | HIST1H<br>2AE  |
|  |  |  |  | FBLN2          |  |  |  | LRRC3        |  |                |
|  |  |  |  | PPP1R1<br>C    |  |  |  | LRP1B        |  |                |
|  |  |  |  | SDK2           |  |  |  | APBB1IP      |  |                |
|  |  |  |  | FGF2           |  |  |  | PLAG1        |  |                |
|  |  |  |  | RBM46          |  |  |  | NME5         |  |                |
|  |  |  |  | TOGAR<br>AM2   |  |  |  | PRR16        |  |                |

|  |  |  |  |          |  |  |  |          |  |  |  |
|--|--|--|--|----------|--|--|--|----------|--|--|--|
|  |  |  |  | CYP27B1  |  |  |  | NRAP     |  |  |  |
|  |  |  |  | CCDC88B  |  |  |  | BARHL1   |  |  |  |
|  |  |  |  | WFDC3    |  |  |  | TIMP2    |  |  |  |
|  |  |  |  | GAB3     |  |  |  | B4GALT5  |  |  |  |
|  |  |  |  | ATP8A2   |  |  |  | TGM5     |  |  |  |
|  |  |  |  | NAT14    |  |  |  | TMEM229B |  |  |  |
|  |  |  |  | FNDC7    |  |  |  | RIMBP2   |  |  |  |
|  |  |  |  | DLC1     |  |  |  | RSPO1    |  |  |  |
|  |  |  |  | WIF1     |  |  |  | SPDYA    |  |  |  |
|  |  |  |  | SORCS2   |  |  |  | OTP      |  |  |  |
|  |  |  |  | LCN2     |  |  |  | OR52J3   |  |  |  |
|  |  |  |  | OXTR     |  |  |  | AKAP12   |  |  |  |
|  |  |  |  | ANGPT1   |  |  |  | RGS14    |  |  |  |
|  |  |  |  | AARSD1   |  |  |  | SOAT1    |  |  |  |
|  |  |  |  | BEND5    |  |  |  | ADORA1   |  |  |  |
|  |  |  |  | CD3G     |  |  |  | TLL1     |  |  |  |
|  |  |  |  | KCNAB2   |  |  |  | CACNA1A  |  |  |  |
|  |  |  |  | RAB2B    |  |  |  | DNASE1L3 |  |  |  |
|  |  |  |  | SCARA3   |  |  |  | KCNT2    |  |  |  |
|  |  |  |  | GJB4     |  |  |  | NLRC4    |  |  |  |
|  |  |  |  | LPXN     |  |  |  | BGN      |  |  |  |
|  |  |  |  | LGALS3BP |  |  |  | CHCHD10  |  |  |  |
|  |  |  |  | TVP23A   |  |  |  | LGALS2   |  |  |  |
|  |  |  |  | RGMA     |  |  |  | DCN      |  |  |  |
|  |  |  |  | NID1     |  |  |  | SCIMP    |  |  |  |
|  |  |  |  | CHD5     |  |  |  | SGIP1    |  |  |  |
|  |  |  |  | BCL6B    |  |  |  | CCDC24   |  |  |  |
|  |  |  |  | KANK3    |  |  |  | EML1     |  |  |  |
|  |  |  |  | KLK8     |  |  |  | SP5      |  |  |  |
|  |  |  |  | ALCAM    |  |  |  | PTGES3L  |  |  |  |
|  |  |  |  | RASL10A  |  |  |  | TMEM198  |  |  |  |
|  |  |  |  | SFMBT2   |  |  |  | SH2D5    |  |  |  |
|  |  |  |  | SHE      |  |  |  | SLC11A1  |  |  |  |
|  |  |  |  | PLCL1    |  |  |  | MYL6B    |  |  |  |
|  |  |  |  | JPH1     |  |  |  | ZNF382   |  |  |  |
|  |  |  |  | HIST2H3D |  |  |  | SLIT2    |  |  |  |
|  |  |  |  | DUSP6    |  |  |  | SH2B2    |  |  |  |
|  |  |  |  | DUSP1    |  |  |  | ANKLE1   |  |  |  |
|  |  |  |  | NHS      |  |  |  | TM4SF1   |  |  |  |
|  |  |  |  | IRF8     |  |  |  | AARSD1   |  |  |  |
|  |  |  |  | ZFP92    |  |  |  | ABI3BP   |  |  |  |
|  |  |  |  | KCNU1    |  |  |  | PIP5K1B  |  |  |  |
|  |  |  |  | BARX2    |  |  |  | BEGAIN   |  |  |  |
|  |  |  |  | CADM4    |  |  |  | ACOX2    |  |  |  |
|  |  |  |  | EFCAB12  |  |  |  | PPFIA4   |  |  |  |
|  |  |  |  | CALHM6   |  |  |  | IFITM5   |  |  |  |
|  |  |  |  | MAGI2    |  |  |  | DNM3     |  |  |  |
|  |  |  |  | CYP7B1   |  |  |  | AGAP2    |  |  |  |

|  |  |  |              |  |  |  |                |  |  |
|--|--|--|--------------|--|--|--|----------------|--|--|
|  |  |  | RAMP3        |  |  |  | PKNOX2         |  |  |
|  |  |  | ACSBG1       |  |  |  | ATP2A3         |  |  |
|  |  |  | CREB5        |  |  |  | BICC1          |  |  |
|  |  |  | SOGA1        |  |  |  | FAM229A        |  |  |
|  |  |  | SOX5         |  |  |  | STYXL1         |  |  |
|  |  |  | ANKRD<br>61  |  |  |  | NFASC          |  |  |
|  |  |  | CPLANE<br>2  |  |  |  | ARID3C         |  |  |
|  |  |  | ADAMT<br>S15 |  |  |  | C3             |  |  |
|  |  |  | IRX2         |  |  |  | CCDC173        |  |  |
|  |  |  | GPR63        |  |  |  | NKD2           |  |  |
|  |  |  | RELN         |  |  |  | PHLDA1         |  |  |
|  |  |  | INPP5D       |  |  |  | PIWIL2         |  |  |
|  |  |  | RHBDL3       |  |  |  | KCNC3          |  |  |
|  |  |  | EDN1         |  |  |  | GPR162         |  |  |
|  |  |  | IRX3         |  |  |  | SHC3           |  |  |
|  |  |  | ZNF879       |  |  |  | RASAL1         |  |  |
|  |  |  | HPN          |  |  |  | SLC26A10       |  |  |
|  |  |  | PRSS53       |  |  |  | SLC12A8        |  |  |
|  |  |  | SLC2A4       |  |  |  | CLDN8          |  |  |
|  |  |  | CYP2R1       |  |  |  | GFRA4          |  |  |
|  |  |  | MMRN<br>1    |  |  |  | AP00081<br>2.5 |  |  |
|  |  |  | LEF1         |  |  |  | COL6A6         |  |  |
|  |  |  | ACSM3        |  |  |  | SCN2A          |  |  |
|  |  |  | GMDS         |  |  |  | KIF17          |  |  |
|  |  |  | THBS1        |  |  |  | VILL           |  |  |
|  |  |  | BDNF         |  |  |  | C1orf162       |  |  |
|  |  |  | SEMA6<br>C   |  |  |  | UPB1           |  |  |
|  |  |  | TMEM8<br>6A  |  |  |  | DACH2          |  |  |
|  |  |  | HDDC3        |  |  |  | TREX2          |  |  |
|  |  |  | SOCS3        |  |  |  | C19orf71       |  |  |
|  |  |  | PRSS22       |  |  |  | TOX3           |  |  |
|  |  |  | MZF1         |  |  |  | INSYN2         |  |  |
|  |  |  | DPYSL2       |  |  |  | ABI3           |  |  |
|  |  |  | ZNF8         |  |  |  | CCDC150        |  |  |
|  |  |  | DKK3         |  |  |  | GPR137C        |  |  |
|  |  |  | RPS6KA<br>6  |  |  |  | WNT8A          |  |  |
|  |  |  | FLNB         |  |  |  | WNT11          |  |  |
|  |  |  | ZFP2         |  |  |  | TRAT1          |  |  |
|  |  |  | DOK3         |  |  |  | HIC1           |  |  |
|  |  |  | PTPRM        |  |  |  | CXCR4          |  |  |
|  |  |  | CDKL1        |  |  |  | SNCAIP         |  |  |
|  |  |  | MMRN<br>2    |  |  |  | RAC2           |  |  |
|  |  |  | GCHFR        |  |  |  | HPN            |  |  |
|  |  |  | SPEG         |  |  |  | SKAP1          |  |  |
|  |  |  | GDF7         |  |  |  | PLPPR2         |  |  |
|  |  |  | RTN4RL<br>1  |  |  |  | DNAH1          |  |  |
|  |  |  | APLN         |  |  |  | TTC25          |  |  |
|  |  |  | TXNDC8       |  |  |  | FRAS1          |  |  |
|  |  |  | COL5A3       |  |  |  | DPYSL3         |  |  |

|  |  |  |  |               |  |  |  |         |  |  |  |
|--|--|--|--|---------------|--|--|--|---------|--|--|--|
|  |  |  |  | SPATA3<br>3   |  |  |  | AMBP    |  |  |  |
|  |  |  |  | TBX1          |  |  |  | DMRTA2  |  |  |  |
|  |  |  |  | AWAT2         |  |  |  | PLP1    |  |  |  |
|  |  |  |  | RDH5          |  |  |  | CSMD2   |  |  |  |
|  |  |  |  | TNFRSF<br>13C |  |  |  | EGFL7   |  |  |  |
|  |  |  |  | CAMK2<br>B    |  |  |  | SLC4A3  |  |  |  |
|  |  |  |  | ZNF239        |  |  |  | GNG3    |  |  |  |
|  |  |  |  | RASD2         |  |  |  | PDE7B   |  |  |  |
|  |  |  |  | LPCAT1        |  |  |  | IZUMO1  |  |  |  |
|  |  |  |  | TNIK          |  |  |  | WDR66   |  |  |  |
|  |  |  |  | ENDOD<br>1    |  |  |  | SOX9    |  |  |  |
|  |  |  |  | GLRB          |  |  |  | KIF5A   |  |  |  |
|  |  |  |  | ING4          |  |  |  | CACNA1C |  |  |  |
|  |  |  |  | SPATA4<br>5   |  |  |  | FBXL22  |  |  |  |
|  |  |  |  | OAS3          |  |  |  | WDR38   |  |  |  |
|  |  |  |  | CCL5          |  |  |  | C4orf47 |  |  |  |
|  |  |  |  | FAM13<br>1A   |  |  |  | FLVCR2  |  |  |  |
|  |  |  |  | WSCD2         |  |  |  | SELENOV |  |  |  |
|  |  |  |  | EDAR          |  |  |  | LG12    |  |  |  |
|  |  |  |  | C8G           |  |  |  | HPCA    |  |  |  |
|  |  |  |  | CHRNB<br>1    |  |  |  | MLXIPL  |  |  |  |
|  |  |  |  | PRDM8         |  |  |  | CD200   |  |  |  |
|  |  |  |  | NLGN3         |  |  |  | MSH5    |  |  |  |
|  |  |  |  | DZIP3         |  |  |  | CALCB   |  |  |  |
|  |  |  |  | TNFAIP<br>8L3 |  |  |  | ADCY5   |  |  |  |
|  |  |  |  | WDR25         |  |  |  | SNX32   |  |  |  |
|  |  |  |  | ANO9          |  |  |  | RCN3    |  |  |  |
|  |  |  |  | KCNG3         |  |  |  | CXCL12  |  |  |  |
|  |  |  |  | EHF           |  |  |  | CARD9   |  |  |  |
|  |  |  |  | ADGRF5        |  |  |  | NSMF    |  |  |  |
|  |  |  |  | ADGRG<br>2    |  |  |  | RF01159 |  |  |  |
|  |  |  |  | CYS1          |  |  |  | KRT7    |  |  |  |
|  |  |  |  | TEX26         |  |  |  | PXMP2   |  |  |  |
|  |  |  |  | GAS7          |  |  |  | RASGRF1 |  |  |  |
|  |  |  |  | GPR27         |  |  |  | 10-Mar  |  |  |  |
|  |  |  |  | SNX22         |  |  |  | PRRX2   |  |  |  |
|  |  |  |  |               |  |  |  | MXRA8   |  |  |  |
|  |  |  |  |               |  |  |  | C2CD4C  |  |  |  |
|  |  |  |  |               |  |  |  | BACH2   |  |  |  |
|  |  |  |  |               |  |  |  | LCP1    |  |  |  |
|  |  |  |  |               |  |  |  | CLBA1   |  |  |  |
|  |  |  |  |               |  |  |  | SLC27A6 |  |  |  |
|  |  |  |  |               |  |  |  | FBXO47  |  |  |  |
|  |  |  |  |               |  |  |  | GALR2   |  |  |  |
|  |  |  |  |               |  |  |  | STARD8  |  |  |  |
|  |  |  |  |               |  |  |  | ENOX1   |  |  |  |
|  |  |  |  |               |  |  |  | SAMD14  |  |  |  |
|  |  |  |  |               |  |  |  | KLHL41  |  |  |  |
|  |  |  |  |               |  |  |  | SGMS2   |  |  |  |



|  |  |  |  |  |  |  |  |             |  |  |  |
|--|--|--|--|--|--|--|--|-------------|--|--|--|
|  |  |  |  |  |  |  |  | IMPG1       |  |  |  |
|  |  |  |  |  |  |  |  | HPGD        |  |  |  |
|  |  |  |  |  |  |  |  | HIP1        |  |  |  |
|  |  |  |  |  |  |  |  | PGM5        |  |  |  |
|  |  |  |  |  |  |  |  | PLA2G4B     |  |  |  |
|  |  |  |  |  |  |  |  | SOGA1       |  |  |  |
|  |  |  |  |  |  |  |  | GLI1        |  |  |  |
|  |  |  |  |  |  |  |  | SSC4D       |  |  |  |
|  |  |  |  |  |  |  |  | TLR2        |  |  |  |
|  |  |  |  |  |  |  |  | TMEM26<br>9 |  |  |  |
|  |  |  |  |  |  |  |  | ESR2        |  |  |  |
|  |  |  |  |  |  |  |  | VWF         |  |  |  |
|  |  |  |  |  |  |  |  | PPP1R3C     |  |  |  |
|  |  |  |  |  |  |  |  | SLC6A17     |  |  |  |
|  |  |  |  |  |  |  |  | PLEKH01     |  |  |  |
|  |  |  |  |  |  |  |  | ITPR1       |  |  |  |
|  |  |  |  |  |  |  |  | ACYP2       |  |  |  |
|  |  |  |  |  |  |  |  | AIFM3       |  |  |  |
|  |  |  |  |  |  |  |  | TNC         |  |  |  |
|  |  |  |  |  |  |  |  | SHISA2      |  |  |  |
|  |  |  |  |  |  |  |  | FHL2        |  |  |  |
|  |  |  |  |  |  |  |  | SYT2        |  |  |  |
|  |  |  |  |  |  |  |  | TMEM88<br>B |  |  |  |
|  |  |  |  |  |  |  |  | ARMH4       |  |  |  |
|  |  |  |  |  |  |  |  | SULT4A1     |  |  |  |
|  |  |  |  |  |  |  |  | CERS4       |  |  |  |
|  |  |  |  |  |  |  |  | CRYM        |  |  |  |
|  |  |  |  |  |  |  |  | FLG2        |  |  |  |
|  |  |  |  |  |  |  |  | COL6A2      |  |  |  |
|  |  |  |  |  |  |  |  | CCDC103     |  |  |  |
|  |  |  |  |  |  |  |  | SNX22       |  |  |  |
|  |  |  |  |  |  |  |  | MANSC4      |  |  |  |
|  |  |  |  |  |  |  |  | PIK3R6      |  |  |  |
|  |  |  |  |  |  |  |  | RSKR        |  |  |  |
|  |  |  |  |  |  |  |  | PDLIM4      |  |  |  |
|  |  |  |  |  |  |  |  | INHBB       |  |  |  |
|  |  |  |  |  |  |  |  | COL5A3      |  |  |  |
|  |  |  |  |  |  |  |  | APLP1       |  |  |  |
|  |  |  |  |  |  |  |  | CTSW        |  |  |  |
|  |  |  |  |  |  |  |  | ZFP69       |  |  |  |
|  |  |  |  |  |  |  |  | CTNNA2      |  |  |  |
|  |  |  |  |  |  |  |  | MORN1       |  |  |  |
|  |  |  |  |  |  |  |  | CFD         |  |  |  |
|  |  |  |  |  |  |  |  | CLDN20      |  |  |  |
|  |  |  |  |  |  |  |  | IL10RA      |  |  |  |
|  |  |  |  |  |  |  |  | CHRM1       |  |  |  |
|  |  |  |  |  |  |  |  | EMP3        |  |  |  |
|  |  |  |  |  |  |  |  | IQGAP2      |  |  |  |
|  |  |  |  |  |  |  |  | AREG        |  |  |  |

Table S3: Hallmark pathways from all our RNA-seq studies

Tail\_sc-RNAseq pathways

| NAME                          | Diff       | SC1        | SC2        | SC3        | G1S        | G2M        |
|-------------------------------|------------|------------|------------|------------|------------|------------|
| E2F_TARGETS (131)             | -4.682936  | -3.6657124 | -4.268467  | -3.1023793 | -1.3501003 | -1.1582348 |
| G2M_CHECKPOINT(109)           | -4.0574727 | -3.5039718 | -3.9589846 | -3.154362  | -1.5346452 | 1.4125943  |
| MITOTIC_SPINDLE(55)           | -3.7995632 | -3.45657   | -3.3746545 | -3.5983226 | -1.9686298 | 1.148271   |
| SPERMATOGENESIS (20)          | -2.7097    | -2.587747  | -2.7308521 | -2.6092844 | -2.0825965 | -2.01912   |
| DNA_REPAIR(35)                | -1.7658774 | -1.2542319 | -1.3261507 | -1.0925092 | 1.5067235  | -1.2052015 |
| ESTROGEN_RESPONSE_LATE(39)    | -1.0820348 | -1.0364676 | -1.1823704 | -1.311109  | -1.3219357 | -1.206096  |
| UV_RESPONSE_DN(17)            | -0.8684176 | -0.8568197 | -0.4748836 | -0.8989706 | -1.5496964 | -1.1688973 |
| GLYCOLYSIS(35)                | -0.7186033 | 0.5066259  | 1.1794835  | -0.8322288 | 0.9271684  | 0.9493796  |
| MYC_TARGETS_V2(17)            | -0.6163698 | 0.47856164 | -0.6939467 | 0.7717562  | 1.862138   | -0.6633685 |
| OXIDATIVE_PHOSPHORYLATION(34) | 3.8014102  | 3.8727715  | 3.9656787  | 3.8933487  | 3.4391928  | 3.7819068  |
| MYC_TARGETS_V1(101)           | 3.2650836  | 2.9192746  | 2.8684375  | 3.50464    | 4.7686462  | 3.7057416  |
| UNFOLDED_PROTEIN_RESPONSE(22) | 2.0615308  | 2.0750618  | 1.7570882  | 2.1654615  | 2.4180565  | 2.0971475  |
| PI3K_AKT_MTOR_SIGNALING(18)   | 2.0148757  | 1.7436715  | 1.8168856  | 1.9228346  | 1.5121639  | 1.8904669  |
| INTERFERON_GAMMA_RESPONSE(15) | 1.7909826  | 1.4254903  | 1.6139947  | 1.7082126  | 1.0122232  | 1.0722735  |

|                             |           |            |            |            |            |            |
|-----------------------------|-----------|------------|------------|------------|------------|------------|
| COMPLEMENT(19)              | 1.7091873 | 1.564375   | 1.4140358  | 1.6596674  | 1.0857165  | 1.5047451  |
| P53_PATHWAY(37)             | 1.7050356 | 2.3698084  | 1.8601553  | 1.9064758  | 1.5264822  | 1.0347332  |
| APICAL_JUNCTION(24)         | 1.6896509 | 2.106274   | 2.0134456  | 1.8080944  | 1.4377779  | 1.3275843  |
| APOPTOSIS(36)               | 1.6242682 | 1.845518   | 1.410226   | 1.2935796  | 1.3854384  | 1.0857083  |
| HEME_METABOLISM(19)         | 1.5273745 | 1.5359646  | 1.47111    | 0.9921816  | 0.9104973  | 1.1543444  |
| HYPOXIA(41)                 | 1.4429158 | 1.0555362  | 1.8087212  | 1.3543615  | -0.5798251 | -0.5913035 |
| FATTY_ACID_METABOLISM(26)   | 1.3684269 | 1.4507499  | 1.0484419  | 1.3456621  | 1.195047   | 1.5306946  |
| ADIPOGENESIS(31)            | 1.3648088 | 1.4306811  | 1.3495574  | 1.1902834  | 1.0909387  | 1.1220694  |
| MTORC1_SIGNALING(61)        | 1.3341583 | 1.3332473  | 1.3095369  | 1.6075851  | 1.5658602  | 1.2920396  |
| MYOGENESIS(25)              | 1.2682966 | 1.189895   | 1.2733841  | 1.0881729  | -1.5470449 | -1.1128021 |
| IL2_STAT5_SIGNALING(25)     | 1.2464702 | 1.5840027  | 1.5088308  | 1.5381008  | 1.010398   | 0.76815104 |
| TNFA_SIGNALING_VIA_NFKB(32) | 1.1795988 | 0.81324124 | 0.8638118  | -1.0219656 | -1.3939989 | -1.5722883 |
| PEROXISOME(16)              | 1.1494766 | -1.0203288 | -0.9958598 | -1.0092525 | -0.6897997 | -0.8614714 |
| COAGULATION(21)             | 1.1192429 | 0.8508343  | 0.70759463 | 0.8164171  | -0.7656635 | -0.6505861 |
| CHOLESTEROL_HOMEOSTASIS(19) | 1.0921057 | -1.130683  | -1.0657239 | -1.3410021 | -1.0363894 | 1.30462    |
| UV_RESPONSE_UP(25)          | 1.0530409 | 0.98483425 | 1.1967087  | 1.4645655  | 1.3650792  | 0.8406757  |
| ESTROGEN_RESPONSE_EARLY(24) | 1.0086446 | -0.8372409 | 0.78612363 | -0.540132  | -1.2021458 | -1.2737598 |

|                                       |            |           |            |            |            |            |
|---------------------------------------|------------|-----------|------------|------------|------------|------------|
| ANDROGEN_RESPONSE(17)                 | 0.982604   | 0.7368959 | 0.8731565  | 0.94490206 | -0.708591  | 0.84426224 |
| KRAS_SIGNALING_UP(16)                 | 0.87573624 | 0.8926478 | 0.6622392  | -0.5920608 | -1.2808753 | -1.2886429 |
| XENOBIOTIC_METABOLISM(18)             | 0.8652188  | 0.8839879 | -0.8824338 | -1.1358254 | -0.6629924 | -1.1481693 |
| EPITHELIAL_MESENCHYMAL_TRANSITION(35) | 0.8568717  | 0.9170984 | 1.5241637  | 1.1169033  | -1.1393188 | -0.9202461 |

### BACK Lineages BulkRNAseq pathways

| NAME                                  | K14_NES    | Aspm_NES   | Slc1a3_NES |
|---------------------------------------|------------|------------|------------|
| ADIPOGENESIS(23)                      | -1.7230686 | -1.6615951 | -0.7113095 |
| APICAL_JUNCTION(55)                   | -1.3602146 | -0.636548  | -1.1650925 |
| XENOBIOTIC_METABOLISM(40)             | -1.273821  | -0.5180924 | 1.0235921  |
| KRAS_SIGNALING_DN(79)                 | -1.2222909 | 1.0439161  | -0.837944  |
| KRAS_SIGNALING_UP(73)                 | -1.1887958 | -0.705478  | 0.9697699  |
| HYPOXIA(38)                           | -1.1769724 | -2.436133  | -1.0642399 |
| EPITHELIAL_MESENCHYMAL_TRANSITION(82) | -1.1077985 | -2.444594  | -1.0821555 |
| UV_RESPONSE_UP(28)                    | -0.978177  | 0.9317005  | 1.0360665  |
| INTERFERON_GAMMA_RESPONSE(42)         | -0.8350972 | -1.5736722 | -0.7196346 |
| IL6_JAK_STAT3_SIGNALING(20)           | -0.7998071 | -0.8605501 | 1.0866358  |
| TNFA_SIGNALING_VIA_NFKB(37)           | -0.7233527 | -1.689807  | 0.7619891  |
| FATTY_ACID_METABOLISM(20)             | -0.7127058 | -0.6498675 | -0.8703838 |
| SPERMATOGENESIS(44)                   | 1.7043755  | -1.2103025 | -0.9694198 |
| UV_RESPONSE_DN(25)                    | 1.5465708  | -1.4077727 | 0.6895311  |
| ESTROGEN_RESPONSE_EARLY(39)           | 1.3811834  | -1.5613638 | -0.9670543 |
| GLYCOLYSIS(27)                        | 1.3259623  | -1.6409675 | 1.1435146  |
| HEME_METABOLISM(27)                   | 1.325411   | -0.8607146 | 1.2895303  |
| ESTROGEN_RESPONSE_LATE(34)            | 1.2173046  | -0.9858574 | -1.3250542 |
| COAGULATION(43)                       | 1.1804487  | 2.1603937  | 0.9711534  |
| P53_PATHWAY(18)                       | 1.0687017  | -1.6918521 | -0.9272006 |
| COMPLEMENT(56)                        | 1.0328388  | 1.3844367  | -1.1598985 |
| ALLOGRAFT_REJECTION(76)               | 0.90808254 | -1.060405  | 1.6945944  |
| APOPTOSIS(29)                         | 0.85158426 | -1.1295991 | 1.2176819  |
| IL2_STAT5_SIGNALING(50)               | 0.84490097 | -1.1987575 | 2.1733627  |
| ANGIOGENESIS(16)                      | 0.77023053 | 1.131217   | 1.1706219  |

|                           |           |            |            |
|---------------------------|-----------|------------|------------|
| PANCREAS_BETA_CELLS(15)   | 0.7282419 | -1.1135167 | 1.7134359  |
| INFLAMMATORY_RESPONSE(81) | 0.6873166 | -0.8574358 | -0.5551702 |
| MYOGENESIS(70)            | 0.5473834 | -2.2354105 | -1.1164178 |
| BILE_ACID_METABOLISM(26)  | 0.4445975 | 0.9281388  | -0.9497377 |

### TAIL Lineages BulkRNAseq pathways

| NAME                                  | Dlx1_NES   | Aspm_NES   | Slc1a3_NES |
|---------------------------------------|------------|------------|------------|
| EPITHELIAL_MESENCHYMAL_TRANSITION(81) | -2.6186883 | -2.3714032 | -3.4202883 |
| UV_RESPONSE_DN(34)                    | -1.9197372 | -1.9594172 | -1.7762134 |
| P53_PATHWAY(16)                       | -1.7161264 | -1.1403478 | -1.575166  |
| APICAL_JUNCTION(62)                   | -1.6988373 | -0.9111538 | -1.3946847 |
| ESTROGEN_RESPONSE_EARLY(47)           | -1.6603141 | -1.7536302 | -1.9194853 |
| XENOBIOTIC_METABOLISM(40)             | -1.4936395 | 1.4369602  | -0.9087182 |
| BILE_ACID_METABOLISM(28)              | -1.2516438 | 0.6665449  | 1.0057685  |
| UV_RESPONSE_UP(26)                    | -1.2073126 | 0.58741003 | -0.7453425 |
| IL6_JAK_STAT3_SIGNALING(21)           | -1.1945552 | -1.3556325 | -1.5200282 |
| ADIPOGENESIS(23)                      | -1.1065606 | 0.95920795 | -0.8430871 |
| IL2_STAT5_SIGNALING(50)               | -0.9799851 | 0.8211293  | -1.5377597 |
| HEME_METABOLISM(27)                   | -0.8823531 | 0.9291757  | -0.6240804 |
| ESTROGEN_RESPONSE_LATE(39)            | -0.8815707 | 0.91418177 | -0.8276745 |
| INTERFERON_GAMMA_RESPONSE(54)         | -0.8676996 | -0.992394  | -1.7959685 |
| INFLAMMATORY_RESPONSE(78)             | -0.859344  | 0.98626304 | -2.2286022 |
| GLYCOLYSIS(35)                        | -0.8585612 | -1.668841  | 0.57231283 |
| SPERMATOGENESIS(41)                   | -0.81315   | 0.9893882  | -0.9112202 |
| MYOGENESIS(68)                        | -0.7283331 | -2.076922  | 0.97508645 |
| HYPOXIA(43)                           | -0.6789476 | -1.621721  | 0.7484723  |
| INTERFERON_ALPHA_RESPONSE(19)         | -0.6589274 | -0.9863508 | -1.6548676 |
| ALLOGRAFT_REJECTION(70)               | 2.289419   | 0.82894033 | -1.8440007 |
| PANCREAS_BETA_CELLS(18)               | 1.645536   | 0.7656557  | 1.3558906  |
| KRAS_SIGNALING_UP(77)                 | 1.2137183  | 1.1777133  | -1.0576171 |
| COAGULATION(40)                       | 1.1363317  | -0.8872311 | 0.7577182  |
| APOPTOSIS(34)                         | 1.0492808  | 0.5125637  | -1.4000115 |
| COMPLEMENT(51)                        | 0.8890659  | 1.1915193  | -0.8677361 |
| KRAS_SIGNALING_DN(77)                 | 0.8760653  | -0.8056086 | 0.87724537 |
| FATTY_ACID_METABOLISM(19)             | 0.8416021  | 0.80583864 | 0.89124566 |
| TNFA_SIGNALING_VIA_NFKB(47)           | 0.8196529  | -0.9630933 | -2.8415568 |
