# Supplementary material
Source: PubMed Central journal article supplement (PMC9475544)
Supplement: EMBJ-41-e110488-s006.pdf [file EMBJ-41-e110488-s006.pdf]

## Expanded View Figures

### Figure EV1. H2B-GFP LRC and non-LRC IFE domains in mouse tail skin from lineage-traced mice (Associated with Fig 1).

- A Whole mount view (top) and sections (bottom) of mouse tail skin from *Dlx1-/Slc1a3-/AspmCreER x K5-tTA/pTRE-H2BGFP* mice showing H2BGFP label retaining cells (LRCs) after doxycycline (doxy) chases. Scale bar = 50 or 200  $\mu\text{m}$  as indicated on panels. Interscale regions have been previously shown enriched in LRCs (Mascre *et al*, 2012; Gomez *et al*, 2013; Sada *et al*, 2016). Here, scale and interscale regions are tentatively outlined based on the known H2B-GFP LRC clustering, the 3-hair follicle grouping patterns and DAPI staining.
- B Cartoon showing the microscopic view for whole mount and sections.
- C Top Panels: Schematics of tet-off (left) versus tet-on (right) inductions used for comparison with (Piedrafita *et al*, 2020). Bottom Panels: Tail skin sections from K5-tta x and K14-rta x pTRE-H2BGFP mice stained with interscale (K10) marker (as indicated). "Mosaicism" denotes areas of the IFE devoid of H2BGFP due to deficiency in transgene expression. High vs. low exposure images demonstrate enrichment of LRCs in the interscale areas in both mouse models. Better contrast is obtained in the K5-tTa (our preferred) mouse model compared to the K14-rTa (Piedrafita *et al*, 2020) and a minimum of 2-week chase is required to note differences.
- D Tail skin sections stained for LRC/non-LRC markers as in Fig 1D, exhibit preferred overlap with H2BGFP LRC or non-LRCs IFE domains. Dotted lines indicate scale or interscale, depending on which is written within the image.

Source data are available online for this figure.

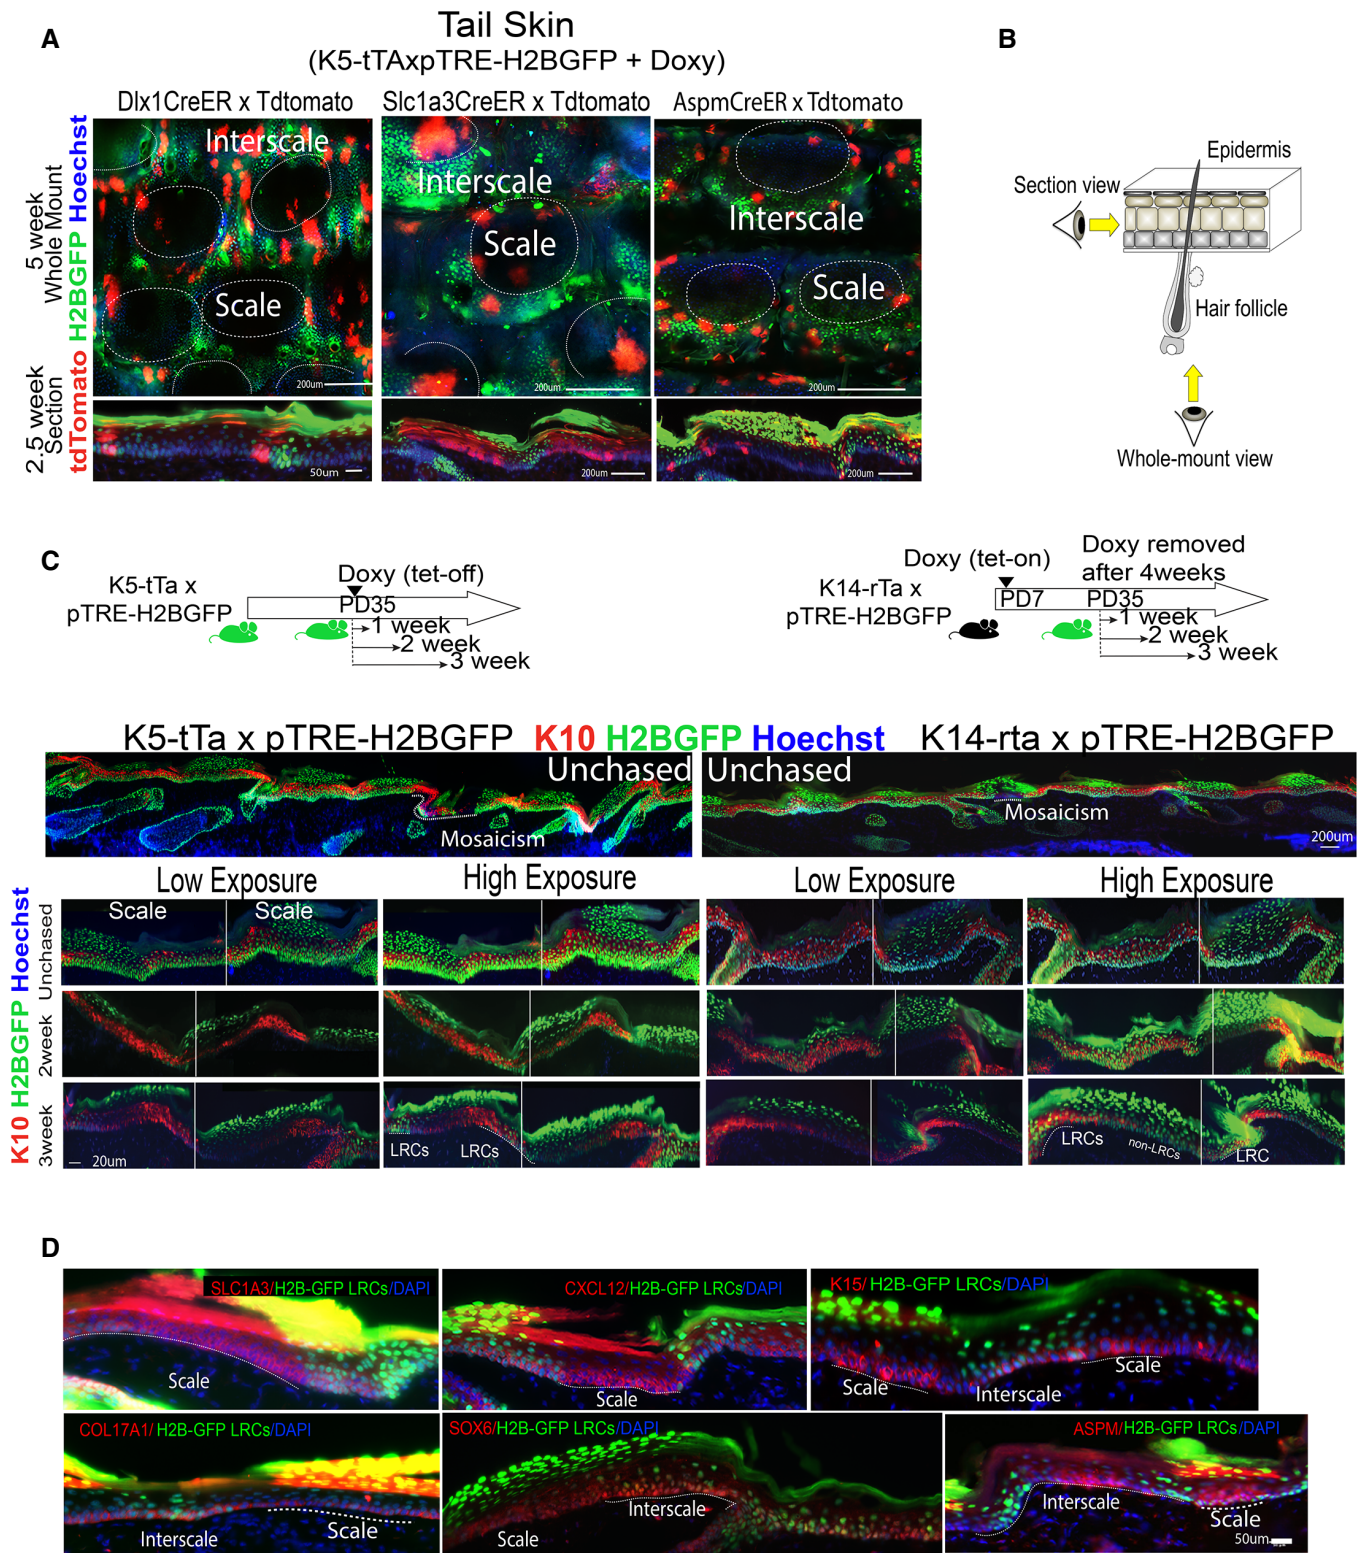

Figure EV1.

**Figure EV2. H2B-GFP LRC and non-LRC IFE domains in mouse non-tail body regions from lineage-traced mice (Associated with Fig 1).**

- A Schematic of tamoxifen and doxy chase times for various body skin regions.
- B Back and ear skin sections from unchased K5-tTA x pTRE-H2BGFP mice. Mosaicism is due to deficiency in transgene expression in ear skin. Scale bars = 200  $\mu$ m.
- C, D Whole mount (C) and section (D) view of back from lineage-traced mice showing 2-week chased H2B-GFP (green) postinjection with high tamoxifen (TM) dose. Scale bars = 200  $\mu$ m (C) or as indicated (D). Dashed line in (C) indicates non-LRC patches devoid of H2BGFP signal. Dotted lines in (D) indicated basement membrane.
- E Images of skin from back, ear and paw immuno-stained for some markers from Fig 1D. Dotted lines in (E) indicates ROI in basement membrane. Scale bar is as indicated per row.
- F, G (F) Quantification of images like those in (E) with  $n = 2-5$  mice and 6-7 images per mouse showing marker heterogeneity and (G) overlap with H2BGFP LRCs vs. non-LRCs domains.  $P$ -values were calculated by two-tail Student's  $t$ -test.

Source data are available online for this figure.

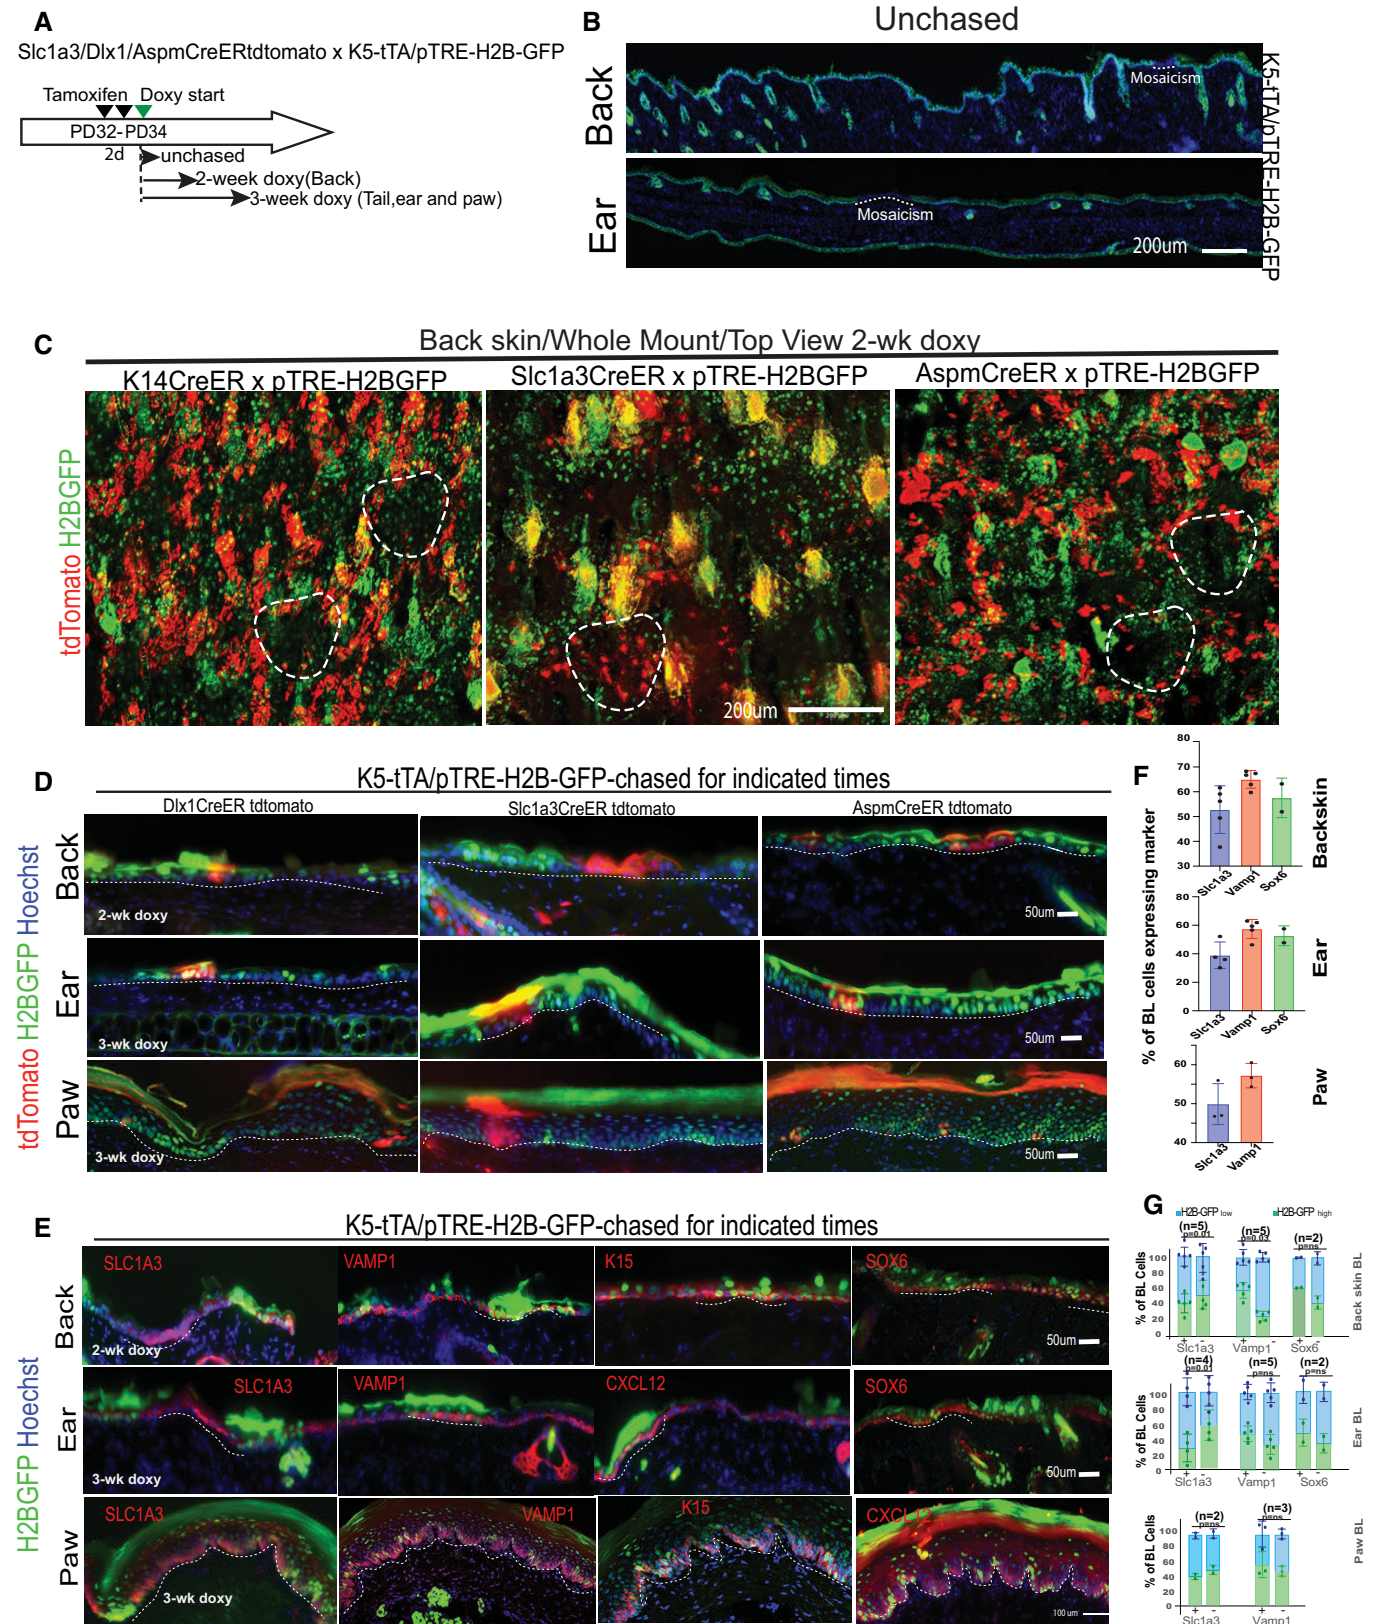

Figure EV2.

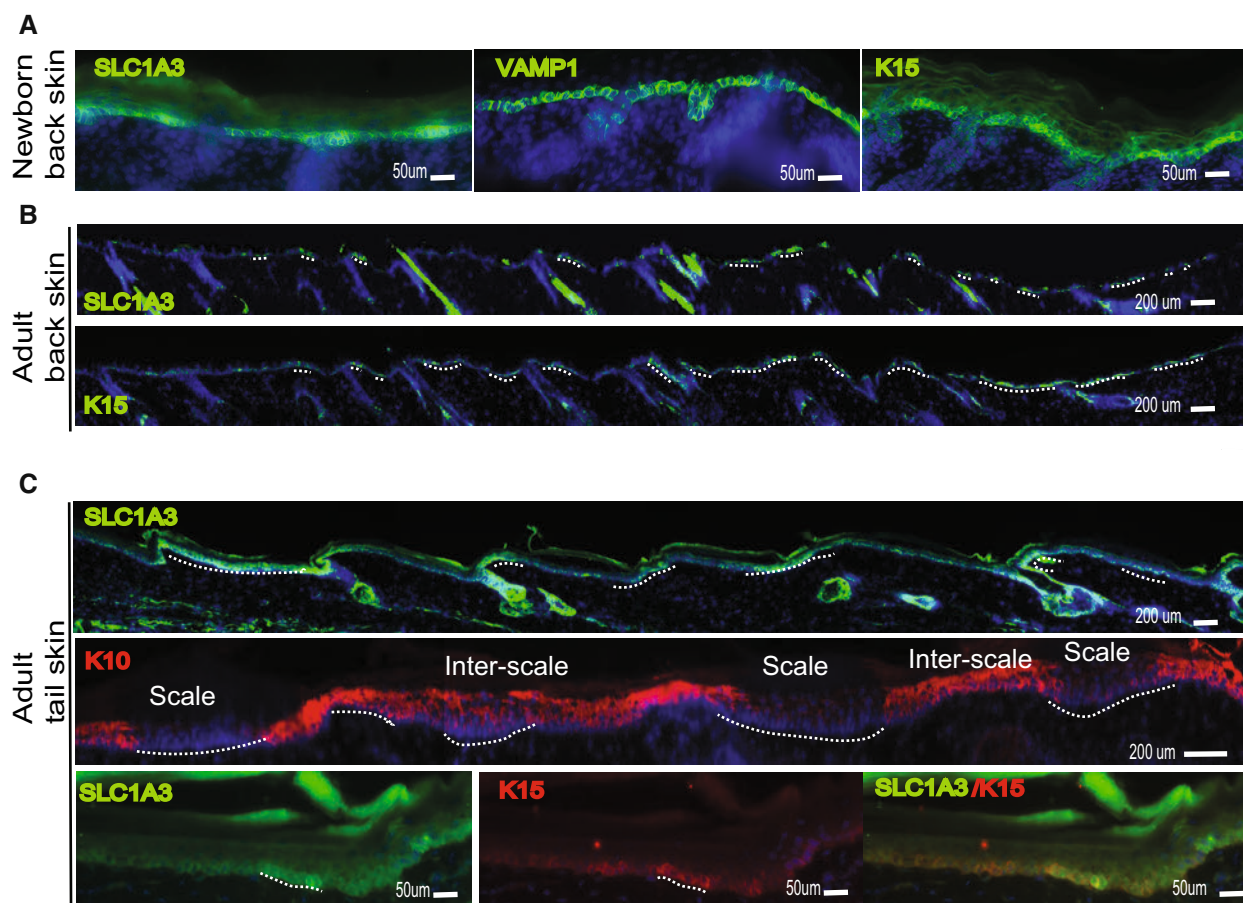

**Figure EV3. Expression of select markers in newborn versus adult mouse skin (Associated with Fig 1).**

A–C Immunostaining for select markers analyzed in Fig 1D shown here in mouse skin from newborn (A) vs. adult back (B) and adult tail (C) skin. Markers show more uniform expression in newborn back skin. Scale = 50 or 200 µm as indicated on panels.

Source data are available online for this figure.

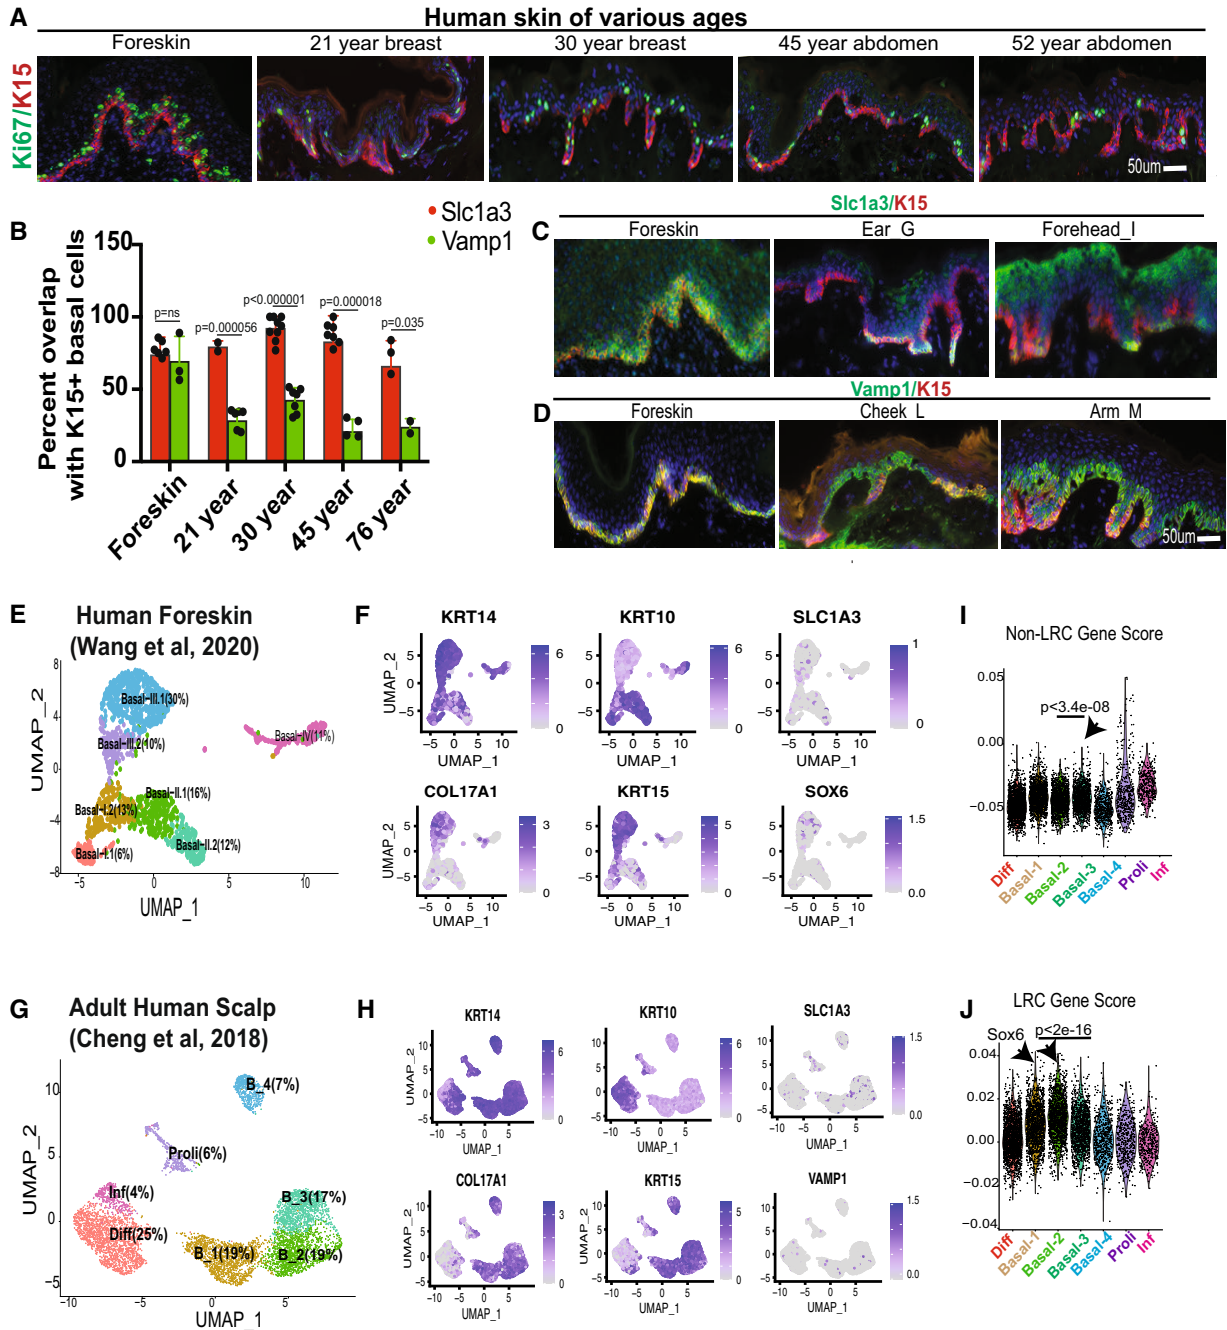

**Figure EV4. Human skin LRC/non-LRC marker staining and scRNA-seq analysis (Associated with Fig 2).**

- A Ki67 staining of human skin at various ages. Scale = 50  $\mu$ m for all the panels.
- B Quantification demonstrates preferential colocalization of K15 with Slc1a3 (non-LRC/scale marker), but not with Vamp1 (LRC/inter-scale marker) in human skin of all ages, except in newborn foreskin. Error bars are SDs. 2–9 images were quantified from two different samples at every age. *P*-values were calculated by two-tailed Student's *t*-test.
- C, D Examples of staining in newborn foreskin and other adult body regions suggests more pronounced heterogeneity in the adult. Scale = 50  $\mu$ m for all the panels.
- E–H (E, G) Seurat generated clusters from scRNA-seq extracted from indicated studies shown as UMAP plots. (F, H) Feature plots show expression of specific markers in clusters from (E) and (G), respectively.
- I, J Non-LRC and LRC gene enrichment score analysis in cell clusters from (Cheng *et al*, 2018). *P*-values were calculated using pairwise Wilcoxon rank-sum tests with Benjamini-Hochberg correction.

Source data are available online for this figure.

**Figure EV5. Mouse back skin scRNA-seq of sorted basal LRCs, Mid-LRCs, Non-LRCs (Associated with Figs 3 and 4).**

- A–C (A) mRNA or gene count and percent mitochondrial genes reflecting the quality of selected cells used for scRNA-seq analysis are shown as violin plots for the (A) two mouse replicates and (B) three sorted IFE cell samples and (C) ten clusters used in our scRNA-seq experiment.
- D, E High correlation between UMAP plots (D) and clusters in gene expression matrix (E) from the two mouse replicates.
- F–H Gene expression changes in sorted basal cells from microarray (Sada *et al*, 2016) (F), scRNA-seq (G) and qRT-PCR (H); SEM and P-values are indicated.  $N = 3$  in (F), two mice in (G) and 4–5 mice (NT is not tested) in (H). Note low or undetectable levels of many markers in (G). Two-tailed Student's *t*-test.
- I Violin plots showing expression of genes extracted from refs (Dekoninck *et al*, 2020; Haensel *et al*, 2020) utilized to assign cell identity to each cell cluster.
- J Violin plot representation for the LRC/non-LRC marker expression in the given clusters across the samples showing generally low expression or weak differences in clusters.
- K Feature plots of cluster-defining markers and LRC/non-LRC genes.
- L Scores extracted from previous publication as indicated (Dekoninck *et al*, 2020; Haensel *et al*, 2020; Wang *et al*, 2020) demonstrate correlations among our 3 SC populations with the other databases (Dataset EV1). *P*-value was calculated using pairwise Wilcoxon rank-sum tests with Benjamini-Hochberg correction.
- M Cell cycle scoring of cells in various clusters as defined by cell-cycle phase-specific gene lists using AddmoduleScore (see Materials and Methods) function in Seurat.
- N LRCs and non-LRCs gene scores from previous microarray of back skin (Sada *et al*, 2016) detect both gene sets in all single-cell derived clusters with some enrichment. *P*-value was calculated using pairwise Wilcoxon rank-sum tests with Benjamini-Hochberg correction.

Source data are available online for this figure.

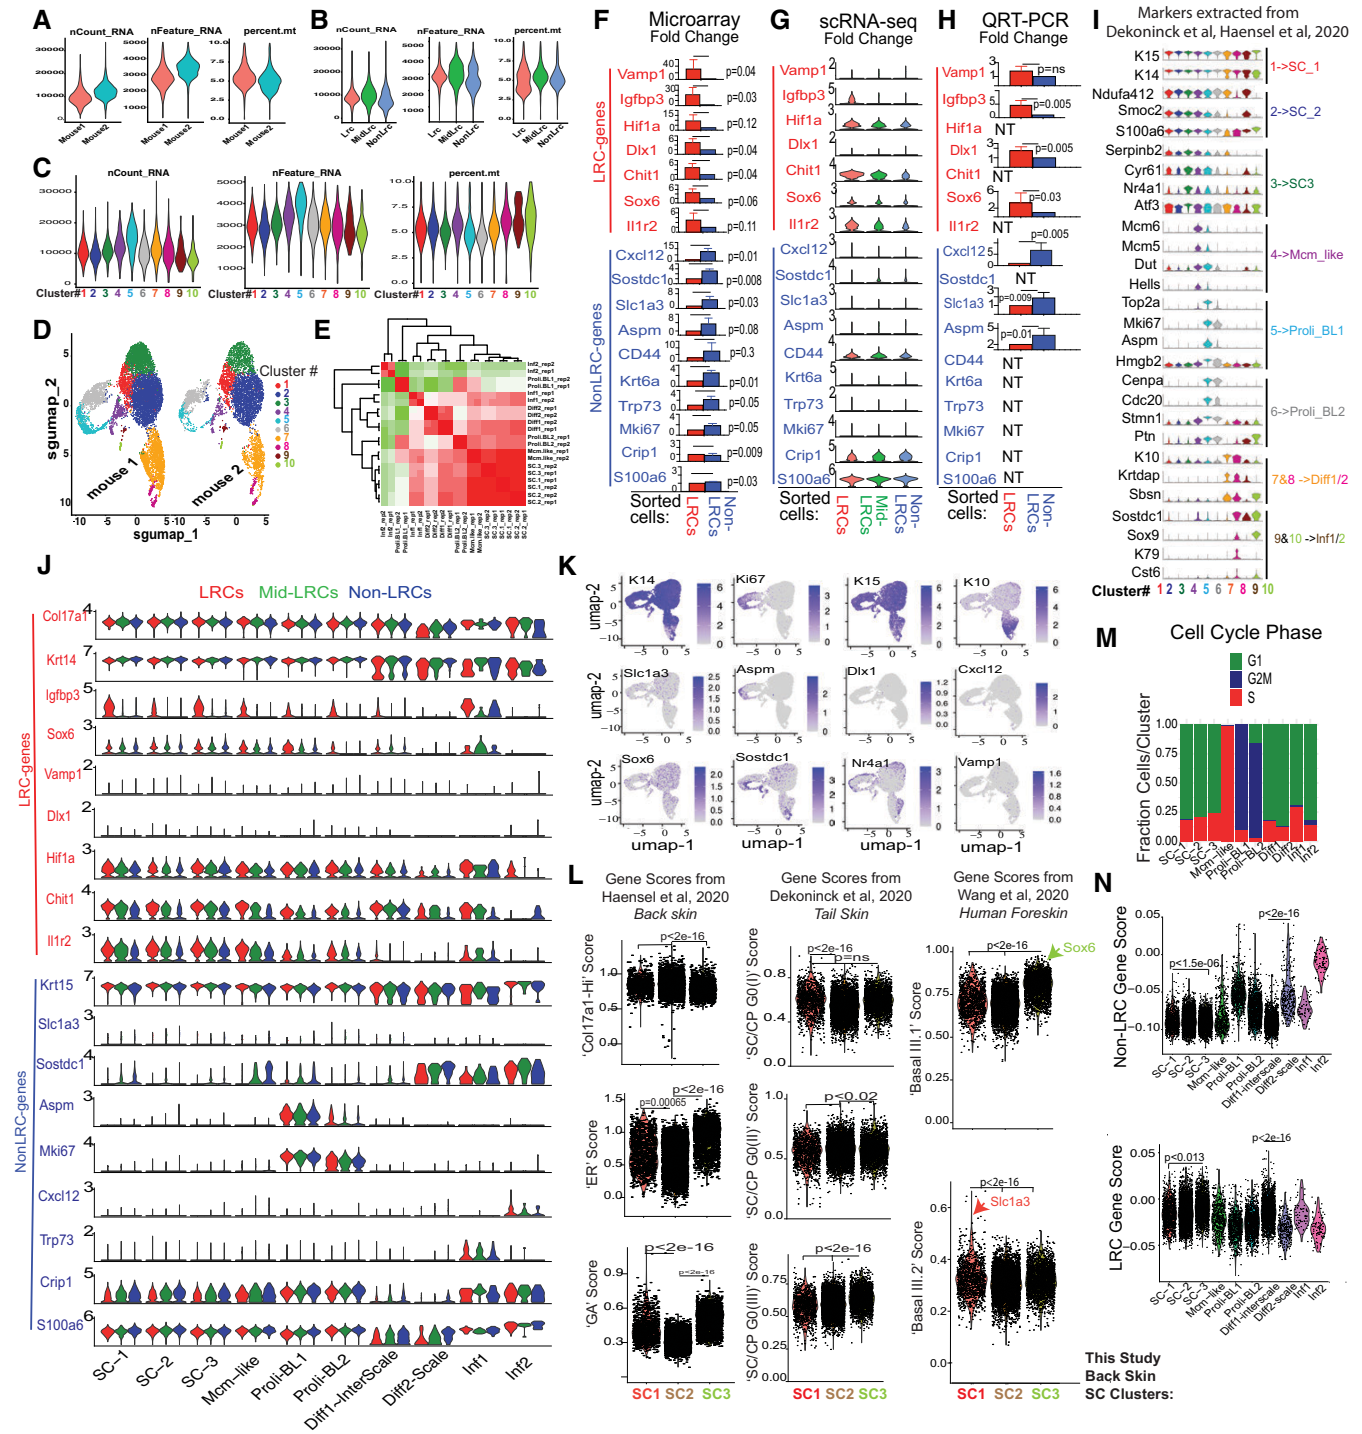

Figure EV5.
